# Supplementary material for: 2013 Annual Report of the American Board of Psychiatry and Neurology, Inc.
Source: Atypon-hosted journal article supplement (doi:10.1176/appi.ajp.2014.1710902), 2014-09-01
Supplement: 1015_ds001.pdf [file 1015_ds001.pdf]

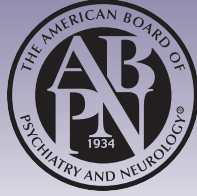

American  
Board of  
Psychiatry and  
Neurology, Inc.

A Member Board of the American Board of Medical Specialties (ABMS)

# ABPN Congratulations

Announcing diplomates of the ABPN for: **Certification in the subspecialty of Child and Adolescent Psychiatry awarded September 23 ,2013**

## CHILD AND ADOLESCENT PSYCHIATRY (271 DIPLOMATES)

John Philip Abraham, D.O., Austin, TX  
Peter Bradford Adams Jr., M.D., Braintree, MA  
Abiola Oladapo Adelaja, M.D., Rochester, NY  
Tisa Adiya Adkinson, D.O., Hamden, CT  
Richa Aggarwal, M.D., New York, NY  
Veena Tripathi Ahuja, M.D., Powell, OH  
Efosa Osahon Airuehia, M.D., Columbia, MO  
Oyindamola Abimbola Ajibade-Akonai, M.D., Lititz, PA  
Benjamin Howard Albrecht, D.O., Beaver Creek, OH  
Mohammad Saleh Alghamdi, M.D., Edmonton, AB  
Firuza Aliyeva, M.D., Chicago, IL  
Allan Michael Andersen, M.D., Baltimore, MD  
Jitendra Reddy Annappareddy, M.D., Lynchburg, VA  
Saba A Arce, M.D., Chandler, AZ  
Leroy Arenivar, M.D., Austin, TX  
Emily Jennifer Aron, M.D., Pittsburgh, PA  
Linda Audrey Asante-Ackuayi, M.D., Ripon, CA  
Rebecca Jacqueline Aspden, M.D., Philadelphia, PA  
Ashutosh Atri, M.D., Kearney, NE  
Todd Matthew Augustus, M.D., Arlington, VA  
Ranjan Kumar Avasthi, M.D., Atlanta, GA  
Alvi Azad, D.O., Apo, AP  
Rajan Bahl, M.D., San Francisco, CA  
Malena Amina Banks, M.D., Capitol Heights, MD  
Aniruddh Prakash Behere, M.D., Rockport, ME  
Joaquin Baca Bermudez, D.O., Phoenix, AZ  
Richa Bhatia, M.D., Pleasanton, CA  
Irfan Sarwar Bhatti, M.D., Overland Park, KS  
Lincoln Charles Bickford, M.D. Ph.D., Monte Rio, CA  
Michael Leo Birnbaum, M.D., New York, NY  
Natalija Bogdanovic, M.D., Jamaica Plain, MA  
Naveena Sesikeran Boindala, M.D., Oklahoma City, OK  
Kinshuk Bose, M.D., Orlando, FL  
Kristie Boyce, M.D. MPH, San Francisco, CA  
Anne Buchanan, D.O., New York, NY  
Tara Romasanta Buck, M.D., Tulsa, OK  
Claudia Frances Califano, M.D., Guilford, CT  
Linda Call, M.D., Bow, NH

Luis M. Carcache, M.D., Miami, FL  
Ruxandra Carp, M.D., Winchester, MA  
Olivia Kristen Carrick, M.D., Westwood, MA  
Anthony John Cavalieri, M.D., Cincinnati, OH  
Jessica Renee Cayce, M.D., Marble Falls, TX  
William Harvey Cerrato, D.O., Annapolis, MD  
Prakash Chandra, M.D., Kansas City, MO  
Jason Victor Chang, M.D., Des Plaines, IL  
Parkavi Chellappa, M.D., Fayetteville, NC  
Joyce T Chen, M.D., Monroe Township, NJ  
Shaylin P. Chock, M.D., Toluca Lake, CA  
Gohar Choudhary, M.D., Chantilly, VA  
Pascale Chrisphonte, M.D., Farmingdale, NY  
Nicole DiDenti Christiansen, M.D., Portland, OR  
Weiming David Chu, M.D., Costa Mesa, CA  
Christina Earlene Clark, M.D., Seattle, WA  
Vered Birmaher Cohen, M.D., Pittsburgh, PA  
Rosario Maria Cosme Cruz, M.D., Chicago, IL  
Schvon Leigh Cummings, M.D., Quincy, IL  
Arman Danielyan, M.D., Walnut Creek, CA  
Lorraine Hooke Davies, M.D., Grants Pass, OR  
Nathan John Davis, M.D., Norman, OK  
Deepmala Deepmala, M.B.B.S., Little Rock, AR  
Michael John Dewberry, M.D., Glastonbury, CT  
Rasheshkumar B. Dholakia, M.D., M.P.H., Scranton, PA  
Alan Randall Dimond, M.D., Madison, WI  
Henry Patrick Charles Driscoll, M.D., Pittsburgh, PA  
David Isaac Driver, M.D., Washington, DC  
Rene Marie Duregger, M.D., Johnston, IA  
Francoise R. Eipper, M.D., Portland, OR  
Farshid Farrahi, M.D., Dublin, CA  
Lance Feldman, M.D., Charlotte, NC  
Nicole Yvonne Franklin, M.D., Brentwood, TN  
Jason William Friday, M.D., Mesa, AZ  
Nora Delia Friedman, M.D., Waban, MA  
Janine Fuertes-Ramirez, M.D., Ellicott City, MD  
Ritu Narang Gandhi, M.D., Middleton, WI  
Zindadil Manoj Gandhi, M.D., Cherry Hill, NJ

(Child and Adolescent Psychiatry continued)

|                                                           |                                                      |
|-----------------------------------------------------------|------------------------------------------------------|
| Maalobeeka Gangopadhyay, M.D., Nashville, TN              | Elizabeth R. D. L. Lobel, M.D., San Jose, CA         |
| Nicole Danielle Garber, M.D., Houston, TX                 | Adrienne Lona, M.D., Mountain View, CA               |
| Amy Lynn Garner, M.D., Dedham, MA                         | Melissa Rose Lorang, M.D., San Francisco, CA         |
| Dennis Ho-Kong Gee, M.D., San Francisco, CA               | Lorraine Lothwell, M.D., New York, NY                |
| Rose Lorraine George, M.D., Bountiful, UT                 | Marta Barbara Majczak, M.D., Providence, RI          |
| Arashdeep Gill, M.D., Phoenix, AZ                         | Kaaya Malhotra, D.O., Philadelphia, PA               |
| Ingrid Kathleen Gindin, M.D., Pittsburgh, PA              | Katherine Olivia Mallory, M.D., Rockville, MD        |
| Vicente Gonzaga, M.D., South Bend, IN                     | Eleni Maneta, M.D., Boston, MA                       |
| Heather Rae Goode, M.D., Monterey, CA                     | Saima Maqsood, M.D., Salisbury, MD                   |
| Shanti Lila Gooden, M.D., New York, NY                    | Danielle Martin, D.O., Farmingdale, NY               |
| Bradley G Goodson, M.D., Lowell, AR                       | Erin Perdock Martin, D.O., Washington, IA            |
| Monika Goyal, M.D., Columbia, MO                          | Jose Daniel Martinez-Gamba, M.D., Pueblo, CO         |
| Emily Kathryn Gray, M.D., Cambridge, MA                   | Maria Gulshan Master, M.D., Hoboken, NJ              |
| Daniel Isaiah Greene, M.D., Cambridge, MA                 | Nicole A. Matthews, D.O., Wyncote, PA                |
| Elisha Rebecca Greggo, M.D., Columbia, SC                 | Sophia Lloydie Maurasse, M.D., Cambridge, MA         |
| Wei Guan, M.D., Ph.D., Eden Prairie, MN                   | Benjamin Kemink Maxwell, M.D., San Diego, CA         |
| Mayank Gupta, M.D., Dubois, PA                            | Laura M. Mayol Sabatier, M.D., Gainesville, FL       |
| Sari Halpert, M.D., New York, NY                          | Amar Mehta, M.D., San Francisco, CA                  |
| Brandi Allison Hankins, M.D., Jonesboro, AR               | Corey Alexander Meyer, M.D., Somerville, MA          |
| Stephanie Lynn Hartselle, M.D., Pawtucket, RI             | Zehzaa Fawky Makin Mikhaeil, M.D., West Covina, CA   |
| Karah Ann Harvey, M.D., Canal Winchester, OH              | Kristin Ann Miselis, M.D., Seattle, WA               |
| Phillip Anthony Hash, D.O., PhD, Troy, OH                 | Mary Elizabeth Moore, M.D., Sherman Oaks, CA         |
| Kathleen Ann Hecksel, M.D., Charleston, IL                | Claudia Moreno, M.D., Woodbridge, CT                 |
| Howard Revilla Hernandez, M.D., Boston, MA                | Kelly Katherine M. Morton, M.D., MPA, New York, NY   |
| Jason Herrick, M.D., Ardsley, NY                          | Elizabeth McCallum Munzig, D.O., Ojai, CA            |
| Rebecca Marie Hicks, M.D., Boston, MA                     | Deepa Raju Nadimpalli, M.D., Geneva, IL              |
| Hon Lung Ho, M.D. M.P.H., Lynn, MA                        | Elton Rex Naidoo, M.D., Murphy, TX                   |
| Matthew David John Holve, M.D., Berkeley, CA              | Prathila Karunakaran Nair, M.D., Ridgefield Park, NJ |
| Josephine Pardenilla Horita, D.O., Honolulu, HI           | Shobhit Singh Negi, M.D., Clarksville, MD            |
| Michelle Bernadette Hornbaker-Park, M.D., Clarksville, TN | Tan Duy Ngo, M.D., Portland, OR                      |
| Mehnaz Hyder, M.D., Newark, CA                            | Janaki Nimmagadda, M.D., Hoover, AL                  |
| Aalamgeer Khakan Ibrahim, M.D., El Centro, CA             | Saadia Nosheen, M.D., Kitchener, ON                  |
| Sheryllene Ereso Go Ignacio, M.D., Saugus, CA             | Nana Okuzawa, M.D., Silver Spring, MD                |
| Kiran Iqbal, M.D., Ellicott City, MD                      | Garth Jon Olango, M.D., PhD, Bakersfield, CA         |
| Jeanne Pauly Johnson, M.D., Portland, OR                  | Jamie Jill Pacis, M.D., Downers Grove, IL            |
| Katherine Barbara Johnson, M.D., Durham, NC               | Peng Pang, M.D., Saint James, NY                     |
| Fareesh Hobbs Kanga, M.D., Lexington, KY                  | Sabena Panhwar, M.D., Rancho Santa Margarita, CA     |
| Joelle Megan Kezlarian, M.D., Chicago, IL                 | George Papaspyros, M.D., Lafayette, LA               |
| Robert Edward Khalil, M.D., West Redding, CT              | Shrenik Pratapbhai Parekh, M.B.B.S., Portland, OR    |
| Vijay Vivek Khilanani, M.D., Chicago, IL                  | Dhaval Harin Parikh, M.D., Mc Gregor, TX             |
| Nicole Mekesha King, M.D., Atlanta, GA                    | Jay Patel, M.D., Durham, NC                          |
| Rajeev Krishna, M.D., Westerville, OH                     | Jennifer Janell Patterson, M.D., Tybee Island, GA    |
| Sonia Lohiya Krishna, M.D., Los Angeles, CA               | Angel Luis Perez, M.D., Alpharetta, GA               |
| Tanya Brown Krolls, M.D., Houston, TX                     | Aruna Perumal, M.D., Houston, TX                     |
| Brooke R. Kwiecinski, M.D., Oregon, WI                    | Trisha Lyn Pesce, M.D., Wethersfield, CT             |
| Jody Alice Langford, M.D., Dousman, WI                    | Aisha Phillipson, M.D., Gretna, LA                   |
| Betty Lau, M.D., New York, NY                             | Rheanna Edith Platt, M.D., MPh, Baltimore, MD        |
| Benjamin David Lederer, M.D., Sharon, MA                  | Mariela Podolski, M.D., South Glastonbury, CT        |
| Allana R. Lee, D.O., Manchester, CT                       | Gayle Copeland Polsky, M.D., Newport Beach, CA       |
| Ruby E-Jean Lee, M.D., Providence, RI                     | Victoria Celeste Porter, M.D., Baltimore, MD         |
| Naomi Earls Leslie, M.D., Oakland, CA                     | Ornella Judith Potter, M.D., North Providence, RI    |
| Beata Anna Lewis, M.D., Brooklyn, NY                      | Deepak Prabhakar, M.D., M.P.H., Farmington Hills, MI |
| Alice Jyharn Li, M.D., San Jose, CA                       | Samuel Joseph Pullen, D.O., Twin Falls, ID           |
| Htet Htet Linn, M.D., Woodside, NY                        | Priti Purushothaman, M.D., Shaker Heights, OH        |
| Raven Crystal Lipmanson, M.D., Helena, MT                 | Sean David Pustilnik, M.D., Baltimore, MD            |
| Nina Ni Liu, M.D., Highland Park, IL                      | Joanna Quigley, M.D., Pittsburgh, PA                 |

(Child and Adolescent Psychiatry continued)

|                                                   |                                                  |
|---------------------------------------------------|--------------------------------------------------|
| Melissa Rose Quinn, M.D., Bonita, CA              | Garrett Matthew Sparks, M.D., Pittsburgh, PA     |
| Malak Shafik Safwat Rafla, M.D., Cambridge, MA    | Andrea Elise Spencer, M.D., Cambridge, MA        |
| Ranvinder Kaur Rai, M.D., Tracy, CA               | Colin Exall Stewart, M.D., Washington, DC        |
| Desirae J Reeder, M.D., Coppell, TX               | Ashley Kendall Storrs, M.D., Edgewater, NJ       |
| Dana Mansour Reid, D.O., Alpharetta, GA           | Javeed Iqbal Sukhera, M.D., London, ON           |
| Ronald Harry Rempfer Jr., M.D., St Petersburg, FL | Michael Harrison Swetye, M.D., San Francisco, CA |
| Lina Maria Reyes, M.D., Fort Lauderdale, FL       | Reza Taghavi Ardakany, M.D., New York, NY        |
| Alisson L Richards, M.D., Underhill, VT           | Hattie Marie Tapps, D.O., APO, AP, Okinawa       |
| Jessica Richter, D.O., Holtsville, NY             | Pradeep Reddy Tatagari, M.D., Greenfield, WI     |
| Joseph Anthony Rieman, D.O., Fremont, OH          | Frank Kenneth Tedeschi, M.D., New York, NY       |
| Monika Drummond Roots, M.D., Minneapolis, MN      | Ani Maria Tejada-Lipten, M.D., San Antonio, TX   |
| Andrew Jacob Rosenfeld, M.D., Forest Hills, NY    | Joseph Ryan Thoits, M.D., Portland, OR           |
| Shilpa Sachdeva, M.D., Kansas City, MO            | Karen Lesley Thomas, M.D., West Hempstead, NY    |
| Matthew Sachs, M.D., Virginia Bch, VA             | Shari Susan Thomas, M.D., Philadelphia, PA       |
| Jillan Cantor Sackett, M.D., Philadelphia, PA     | Gregory Dean Thorkelson, M.D., Pittsburgh, PA    |
| Cristina Sanchez-Jaquez, M.D., Hartford, CT       | Margaret Rose Tom, D.O., Memphis, TN             |
| Erik Bertil Sandegard, M.D., Danville, CA         | Maria Lee Trent-Watson, M.D., Baltimore, MD      |
| Sharmini Santher, M.D., Chesapeake, VA            | Napatia Moree Tronshaw, M.D., Homewood, IL       |
| Maria Andy Scarbrough, M.D., Madison, MS          | Marie Ly Truong, D.O., Roseville, CA             |
| Rebecca Louise Schaeffer, M.D., Amherst, NY       | Shuja Mohammed Uddin, M.D., Oakbrook Terrace, IL |
| Benjamin Noah Schneider, M.D., Los Angeles, CA    | Shoba Varkey, M.D., Alpharetta, GA               |
| Amanda Valerie Schroepfer, M.D., Honolulu, HI     | Marin Veldic, M.D., Rochester, MN                |
| Svetlana Rose Songco Sembrano, M.D., Phoenix, AZ  | Jagadeesh Venkatesha Reddy, M.D., Granger, IN    |
| Sourav Sengupta, M.D. MPH, Williamsville, NY      | Sarah Yvonne Vinson, M.D., Atlanta, GA           |
| Hinna Ehsanullah Shah, MD, Hazlet, NJ             | Ngoctram Thi Vo, D.O., Anaheim, CA               |
| Snehal Prabodh Shah, M.D., Lakewood, NJ           | Suzanne Renee Voelker, D.O., New York, NY        |
| Sonia Shetal Shah, M.D., Broadview Hts, OH        | Mitali Wadekar, M.D., Los Angeles, CA            |
| Deepika Shaligram, M.D., Lincoln, MA              | Anupama Natraj Wadhwa, M.D., Chicago, IL         |
| M. Shankarapura Nanjappa, MBBS, Minnetonka, MN    | Cecil Ray Webster Jr., M.D., Boston, MA          |
| Michael Shapiro, M.D., Gainesville, FL            | Keely Wyn Wheeler, D.O., Tulsa, OK               |
| Neha Sharma, D.O., Boston, MA                     | Dirk Christopher Winter, M.D., New York, NY      |
| Billina Rose Shaw, M.D., Baltimore, MD            | Sarah Elizabeth Wolfe, M.D., MPh, Pittsburgh, PA |
| Matthew James Shear, M.D., New York, NY           | Celine H. Wong, M.D., Singapore, n/a             |
| Ashok Shimoji-Krishnan, M.D., Seattle, WA         | Andrea Jennifer Wright, M.D., Atlanta, GA        |
| Neeraj Krishna Shukla, M.D., Thorold, ON          | James Jihoon Yi, M.D. Ph.D, Bryn Mawr, PA        |
| Shawn Singh Sidhu, M.D., Albuquerque, NM          | Stacyann Rochellee York, M.D., Chicago, IL       |
| Adam Foster Silberman, M.D., Dunwoody, GA         | Erik Nikolaus Youngdale, M.D., Sacramento, CA    |
| Shannon Wagner Simmons, M.D., Seattle, WA         | Natalie Simone Yzer-Newton, M.D., Baltimore, MD  |
| Kyle Michael Smith, M.D., Salt Lake City, UT      | John Thomas Zaharopoulos, D.O., Phoenix, AZ      |
| Rashminkumar R. Solanki, M.D., North Bergen, NJ   | Michael Patrick Zeola, M.D., Dayton, OH          |
| Susan Solimine, M.D., Barrington, RI              | Faiza Zubair, D.O., Somerset, NJ                 |
| Cathy Ann Southammakosane, M.D., Washington, DC   |                                                  |
