# Supplementary material for: 2013 Annual Report of the American Board of Psychiatry and Neurology, Inc.
Source: Atypon-hosted journal article supplement (doi:10.1176/appi.ajp.2014.1710902), 2014-09-01
Supplement: 1015_ds002.pdf [file 1015_ds002.pdf]

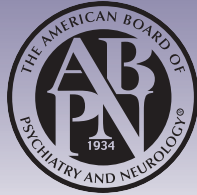

American  
Board of  
Psychiatry and  
Neurology, Inc.

A Member Board of the American Board of Medical Specialties (ABMS)

# ABPN Congratulations

Announcing diplomates of the ABPN for: **Certification in the subspecialty of Child and Adolescent Psychiatry awarded November 15 ,2013**

## CHILD AND ADOLESCENT PSYCHIATRY (265 DIPLOMATES)

Frieda Kamel Aboul-Fotouh, M.D., Brookfield, WI  
Sandra Dewi Abramoff Moehadjir, M.D., Iowa City, IA  
Candace Adair, M.D., Atlanta, GA  
Mehvesh Afrina, M.D., Richardson, TX  
Ruby Ugochi Agoha, M.D., San Diego, CA  
Sufian Mohammad Yasin Agwani, M.D., Roseville, CA  
Frances Marie Aledo Garcia, M.D., Conshohocken, PA  
Jennifer Cabuniag Almendrala, M.D., Seven Fields, PA  
Indhira F Almonte, M.D., Bronx, NY  
Julie Sara Alonso-Katzowitz, M.D., Austin, TX  
Bahar Altaha, M.D., Morgantown, WV  
Ara Anspikian, M.D., Los Angeles, CA  
Denys Esther Arrieta Zorro, M.D., Clovis, CA  
Muhammad Nouman Azhar, M.D., Lombard, IL  
Scott Robert Bartley, M.D., Dallas, TX  
Rhonda Kincaid Bass, M.D., Kingsport, TN  
Hisla Angela Bates, M.D., Jamaica Plain, MA  
Negar Beheshti, M.D., Franklin, MA  
Kristin Pirkola Bernhart, M.D., Woodinville, WA  
Tarun Bhandari, M.D., Brooklyn, NY  
Phintso Paden Dontatsang Bhutia, M.D., New York, NY  
Christopher Todd Bir, M.D., Falls Church, VA  
Anne Frances Bird, M.D., New York, NY  
Sally Ann Boeve, M.D., Tucson, AZ  
James Robert Boger, M.D., Wichita Falls, TX  
Leopold Jorge Bolona, M.D., Union, NJ  
Kalonda Kateece Bradshaw, M.D., New York, NY  
Lesley Thompson Brodie, M.D., Manchester, VT  
Rajvi Broker Sen, M.D., Foxboro, MA  
Dawn Kamilah Brown, M.D., The Woodlands, TX  
Robert Lee Brown Jr., M.D., Salinas, CA  
Kevin LaNeal Buford, M.D., Columbus, GA  
Ushimbra Juval Buford, M.D., Miramar, FL  
Matthew Hale Burson, M.D., Grand Jct, CO  
Barika Marise Butler-Quarles, M.D., Grosse Pointe Park, MI  
Omar Canosa, M.D., Morristown, NJ  
Carlos Sergio Castillo, M.D., De Pere, WI  
Manoj Chandran, M.D., Louisville, KY  
Sujatha Charlu, M.D., New York, NY

Christine Lynn Chiao, D.O., Reston, VA  
Raymond Ee-Mook Chong, M.D., Piscataway, NJ  
Gil Citro, M.D., Ph.D., Pittsburgh, PA  
Cheryl McGary Cobb, M.D., Nashville, TN  
Lindsey Lea Corr, M.D., Omaha, NE  
Michael Robert Cummings, M.D., Clarence Center, NY  
Georgette Marie De Jesus, M.D., San Juan, PR  
Melissa Stanlake Defilippis, M.D., Galveston, TX  
Lea DeFrancisci-Lis, M.D., Southampton, NY  
Lena Dhillon, M.D., American Canyon, CA  
Suzanne M Dieter, M.D., Ridgewood, NY  
John James Diggins, M.D., Berlin, MA  
Anthony Paul Digiovanni, M.D., Fairport, NY  
Helen Tsuon-Yeh Ding, M.D., Hastings On Hudson, NY  
Brian Jamel Dixon, M.D., Fort Worth, TX  
Belal Mohamed Elamir, M.D., Enola, PA  
William Paul Elsass, M.D., Breckenridge, CO  
Bradley Lief Erickson, M.D., Oconomowoc, WI  
Chinwe Tosha Erike, M.D., Groton, CT  
Terri Lynn Erwin, M.D., Prospect, KY  
Elizabeth Anne Feingold, M.D., New York, NY  
Krista Terese Fielding, M.D., Mountain View, CA  
Melinda Gloria Fierros, M.D., San Antonio, TX  
David Allen Fife, D.O., Gilbert, AZ  
Michael Alan Finch, M.D., Asheville, NC  
Constance Nicole Flanagan, M.D., Ellicott City, MD  
Thomas Foley, M.D., Hummelstown, PA  
Shaw Wendi Fortuchang, M.D., Fayetteville, GA  
Yuli Fradkin, M.D., Newton, MA  
Sarah Graham Frazier, M.D., Gainesville, FL  
Thomas Warren Freeman Jr., M.D., Little Rock, AR  
Alison Meri Gedalowitz, M.D., Scarsdale, NY  
Ruth Emily Geller, M.D., Brooklyn, NY  
Christina Jara Gesmundo, M.D., Saint Louis, MO  
Alexander Matthew Getz, M.D., Columbia, SC  
Asad Mohammad Ghiasuddin, M.D., Honolulu, HI  
Cassidy Anne Gillaspie, M.D., Houston, TX  
Diana Sofia Glaccum-Gavagni, M.D., Pembroke Pines, FL  
Kah Hong Goh, M.D., Elmhurst, NY

(Child and Adolescent Psychiatry continued)

|                                                        |                                                         |
|--------------------------------------------------------|---------------------------------------------------------|
| Ericka Lynn Goodwin, M.D., Florissant, MO              | Darryl William Dean McClintock, M.D., Reno, NV          |
| Rohan Gopalani, M.D., Merion Station, PA               | Scot McKay, M.D., Denver, CO                            |
| Francis Gorman, M.D., Clearwater, FL                   | Tina Rae Melendrez-Chu, M.D., Honolulu, HI              |
| Katherine Anders Goudelocke, M.D., Chattanooga, TN     | Travis Scott Mickelson, M.D., Salt Lake City, UT        |
| Chia Sonia Granda, M.D., Kapaa, HI                     | Susan Hyun Ju Tomihama Mikami, M.D., Honolulu, HI       |
| Joseph Leonard Gulino, M.D., Santa Monica, CA          | Justin William Mohatt, M.D., New York, NY               |
| Ranjay Halder, M.D., Saint Petersburg, FL              | Sricharan Moturi, M.D., Franklin, TN                    |
| Celine Alyssa Hamilton, M.D., Leeds, n/a               | Sabooh Sultan Mubbashar, M.D., Woodbridge, CT           |
| Michael Potter Henderson, M.D., Norfolk, VA            | Saranyacharyulu V. Mudumbi, M.D., Brentwood, TN         |
| Jacqueline Linda Henschke, M.D., New Orleans, LA       | John Douglas Napier Muir, M.D., Whitefish, MT           |
| Jeanine Herdman, M.D., McMurray, PA                    | Theodore M Murray, M.D., Belmont, MA                    |
| Jolene Marie Hillwig Garcia, M.D., Harrisburg, PA      | Shreya Maniar Nagula, M.D., South Setauket, NY          |
| Laura J Hollar-Wilt, M.D., Bristol, RI                 | Andrew Geoffrey Nanton, M.D., Tualatin, OR              |
| Wissam Khalil Hoteit, M.D., Sylvania, OH               | Francisco Navarro, M.D., Los Angeles, CA                |
| Nicole J Hraniotis, M.D., Edison, NJ                   | Sarah Denise Neely, M.D., Atlanta, GA                   |
| Paul Franklin Ignatius Jr., M.D., Dubois, PA           | Mai Phuong Nguyen, M.D., Houston, TX                    |
| Lisa Rose Inman, M.D., San Francisco, CA               | Welby Dane Nielsen, D.O., Chico, CA                     |
| Marrisa Monique Isaac, M.D., Austin, TX                | Asma Nisar, M.D., Kendall Park, NJ                      |
| Faye Fatina Istanbooly, M.D., Larue, TX                | Ngozi E. Nnadi, M.D., New Milford, NJ                   |
| Aron Christopher Janssen, M.D., New York, NY           | Erika Lynn Nurmi, M.D., Ph.D., Los Angeles, CA          |
| Venkata R. Jonnalagadda, M.D., Jacksonville, NC        | Teresa Ann O'Brien, M.D., Albuquerque, NM               |
| Thomas Joseph, M.D., Brooklyn Park, MN                 | Paul James O'Leary, M.D., Birmingham, AL                |
| Justus Hung-Ching Kam, M.D., Cincinnati, OH            | Ihuoma Nicole Okezie, M.D., Silver Spring, MD           |
| Nitin Madhukar Kamble, D.O., Leander, TX               | Ebele Okpokwasili-Johnson, M.D., M.P.H., Roslindale, MA |
| Michael Bernard Karluk, M.D., West Olive, MI           | Tolulope Abidemi Olupona, M.D., Astoria, NY             |
| Tejal Kaur, M.D., New York, NY                         | Anna Elisa Ordonez, M.D., Washington, DC                |
| Julia Anne Kearney, M.D., New York, NY                 | Johann Philipp Othmer, M.D., Lititz, PA                 |
| Katherine Lynn Keeton, D.O., Denver, CO                | Shelley Oxenhorn, M.D., Philadelphia, PA                |
| Patricia Ann Kinne, M.D., Galesburg, IL                | Lauren Burr Ozbolt, M.D., Miami, FL                     |
| Rohit Robin Kohli, M.D., Raleigh, NC                   | Johanna Fermina Paulino-Woolridge, D.O., Laurel, MD     |
| Roshni Lani Koli, M.D., Honolulu, HI                   | David Eugene Penner, M.D., Olympia, WA                  |
| Tin Wai Judy Koo, M.D., Austin, TX                     | Pria Persaud, M.D., Poway, CA                           |
| Michael Kornberg, M.D., La Jolla, CA                   | Suzy Ellen Peterson, D.O., Saint Paul, MN               |
| Vidya Krishnan, M.D., San Jose, CA                     | Neda Picuric, D.O., Miami, FL                           |
| Jonathan Michael Kusumi, M.D., Denver, CO              | Kenneth Graham Pittman, M.D., Apison, TN                |
| Tae Young Lee, M.D., Carrollton, TX                    | Sujatha Lakshmi Prayaga, M.D., Temple, TX               |
| John Sylvain Leptic, M.D., Tucson, AZ                  | Ginari Rene Price, M.D., Atlanta, GA                    |
| Mathias James Lillig, M.D., Glenview, IL               | Sonya Elizabeth Pritchard, M.D., Vestavia, AL           |
| Dina Jeehyun Lim, D.O., La Jolla, CA                   | Jennifer Dawn Purses, D.O., University Place, WA        |
| Karen Park Lim, M.D., Singapore, n/a                   | Iram Manzoor Qazi, M.D., Bethesda, MD                   |
| Jonson Job Lin, M.D., Redlands, CA                     | Virgen M. Quinones-Fernandini, M.D., Mayaguez, PR       |
| Ryan Edward Livingston, M.D., Matthews, NC             | MD Habibur Rahman, M.D., Floral Park, NY                |
| Moira Locke, M.D., Orange, CA                          | Aanmol Inderjeet Kaur Rai, M.D., Merced, CA             |
| Zohra Lodin, M.D., Apo, AE                             | Aneita Gloria Rashford, M.D., San Diego, CA             |
| Deep Lohia, M.D., East Elmhurst, NY                    | Pandeewari Raveendran, M.D., Sudbury, MA                |
| Heidi Frances Lopez-Coonjohn, M.D., Douglas, AK        | Himabindu Ravi, M.D., Cary, NC                          |
| Boris Lorberg, M.D., Watertown, MA                     | Clovis Raymond, M.D., New City, NY                      |
| Kelechi JN Loynd, M.D., Saint Louis, MO                | Ravita P Reddy, M.D., Irvine, CA                        |
| Catrina Natae Luca, M.D., Gainesville, FL              | Laura Ellen Griffith Reynolds, M.D., Nashville, TN      |
| Rizwan A. Malik, M.D., Ashburn, VA                     | April Carpenter Richardson, M.D., Greenville, SC        |
| Vikas Malik, M.D., West Hartford, CT                   | Francisco Andres Ripepi, M.D., West Hartford, CT        |
| Jonathan Calimlim Manaoat, M.D., San Francisco, CA     | Marilyn Jonell Roby, M.D., Baton Rouge, LA              |
| Mehreen Mansoor, M.D., Prospect, KY                    | Kristine Wilhelmina Roth, M.D., Bloomfield Hills, MI    |
| Cecilia Patrica Margret, M.B.B.S., Ph.D., Bellevue, WA | Emily Maria Rountree, M.D., Mt Pleasant, SC             |
| Andrew Hayes Martin, M.D., San Antonio, TX             | Cheryl Valerie Rozanov, M.D., High Point, NC            |
| Omanamhe Masagbor, M.D., Rockville Centre, NY          | David Harris Rubin, M.D., Woodcliff Lake, NJ            |

(Child and Adolescent Psychiatry continued)

|                                                       |                                                         |
|-------------------------------------------------------|---------------------------------------------------------|
| Brandi Janness Rudolph Bolling, M.D., Jasper, AL      | Shayla Ann Sullivant, M.D., Shawnee, KS                 |
| David Robert Ruecker, M.D., Encinitas, CA             | Barbara Sumbatian, M.D., Harrisburg, PA                 |
| Duke Ruktanonchai, M.D., BELTON, TX                   | Kavetha Sundaramoorthy, MBBS, Manchester, CT            |
| Kristin Smith Russell, M.D., Belmont, MA              | Murtaza Hamid Syed, M.D., Ann Arbor, MI                 |
| Kathy Jean Russeth, M.D., Milwaukee, WI               | William Biggins Taft, M.D., Madison, WI                 |
| Tatyana Rybakova, M.D., Louisville, KY                | Nouzha Tazi-Mzaalek, M.D., Gibsonia, PA                 |
| Angela Sagar, M.D., Marina Del Rey, CA                | Andrea Temerova, M.D., Los Angeles, CA                  |
| Osama Mohamed Saleh, M.D., Silver Spring, MD          | Miriam Tetelbom, M.D., Highlands, NJ                    |
| Elise Michelle Sannar, M.D., Denver, CO               | Tanya Yvonne Theriault, D.O., Pensacola, FL             |
| Dana Bishop Sarvey, M.D., Somerville, MA              | Tiffany Christine Thomas-Lakia, M.D., Mentor, OH        |
| Sneha Poornima Sastry, M.D., Ann Arbor, MI            | Qionna Mariel Tinney Railey, M.D., Durham, NC           |
| Suneeta Sayyaparaju, M.D., Cranbury, NJ               | Syed Jawad Tirmazi, M.D., Colonia, NJ                   |
| Elizabeth Merritt Schader, M.D., Portland, OR         | Susan Tran, M.D., Gainesville, FL                       |
| Naomi Rachel Schnittman, M.D., Silver Spring, MD      | Michael Long Trieu, M.D., Jamaica Plain, MA             |
| Indira Shah, M.D., Metuchen, NJ                       | Paul Elliot Trombley, M.D., F.A.A.P., Ocean Springs, MS |
| Seema Shah, M.D., Dallas, TX                          | Kimberly Jing-Yei Lee Tseng, M.D., San Francisco, CA    |
| Joseph Jerome Sheridan, M.D., La Mesa, CA             | Jessica Erin Tsourmas, M.D., Austin, TX                 |
| Nawras Shukair, M.D., Boston, MA                      | Emmanuel Aniebonam Ugwuoke, M.D., Glen Mills, PA        |
| Roopa Kyathanahally Siddabasappa, M.D., Cupertino, CA | Amy Kathleen Underwood, M.D., West Fargo, ND            |
| Rebecca Leader Siegel, M.D., New York, NY             | Carlos Benjamin Vargas, M.D., Austin, TX                |
| Evan Christopher Silvi, M.D., Rockford, IL            | Ajay Kumar Veeragandham, M.D., Lumberton, NC            |
| Kevin James Simmons, M.D., Missouri City, TX          | Dana Deaton Verner, M.D., Nashville, TN                 |
| Amer Smajkic, M.D., Hinsdale, IL                      | Theresa Nieva Villaflores, M.D., Saint Louis, MO        |
| Scott Brian Smolar, D.O., San Francisco, CA           | Marjorie Johnson Warren, M.D., Silver Spring, MD        |
| Israel Olusegun A Sokeye, M.D., Plymouth, MN          | Keri N. Wasser, M.D., Montclair, NJ                     |
| Patrick George Sola, M.D., Tucson, AZ                 | Trina Hope Webb, M.D., Lake City, FL                    |
| Joyce Chun Song, M.D., Ann Arbor, MI                  | Diana Lynn Weiner, M.D., Concord, NH                    |
| Andrea Elise Sorensen, M.D., Reno, NV                 | Zoe D. Wilson, M.D., Moorestown, NJ                     |
| Lourdes Soto-Moreno, M.D., Yarmouth, NS               | Molly Michelle Wimbiscus, M.D., Cleveland, OH           |
| Timothy Eric Spiegel, M.D., Saint Louis, MO           | Farhad Khorrami Yaghoubi, M.D., Los Angeles, CA         |
| Serena Roxane Srikureja, M.D., Tustin, CA             | John Matthew Yarbrough, M.D., Acampo, CA                |
| Libbie Louise Stansifer, M.D., Pepper Pike, OH        | Jennifer Louise Yen, M.D., Houston, TX                  |
| Allen Benjamin Stefane, M.D., Fort Mill, SC           | Hiejin Yoon, M.D., White Plains, NY                     |
| Mary Elizabeth Steinmann, M.D., Salt Lake City, UT    | Terica Natasha Young, M.D., Concord, NC                 |
| Ekaterina Alekseyevna Stepanova, M.D., Reno, NV       | Jahanara Zahid, M.D., M.P.H., Hummelstown, PA           |
| Daniel Giovanni Stewart, M.D., Ridgewood, NJ          | Saul Benjamin Zelan, M.D., Berkeley, CA                 |
| Michael Starbin Stewart, M.D., Mendham, NJ            | Xiangyang Zhao, M.D., M.S., Twin Cities, MN             |
| Joel Johnson Stoddard, M.D., Bethesda, MD             |                                                         |
