# Supplementary material for: 2013 Annual Report of the American Board of Psychiatry and Neurology, Inc.
Source: Atypon-hosted journal article supplement (doi:10.1176/appi.ajp.2014.1710902), 2014-09-01
Supplement: 1015_ds003.pdf [file 1015_ds003.pdf]

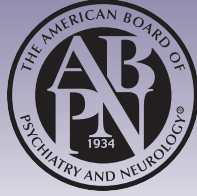

American  
Board of  
Psychiatry and  
Neurology, Inc.

A Member Board of the American Board of Medical Specialties (ABMS)

# ABPN Congratulations

Announcing diplomates of the ABPN for: **Maintenance of Certification in the subspecialty of Child and Adolescent Psychiatry awarded in 2013**

## MOC CHILD AND ADOLESCENT PSYCHIATRY (110 DIPLOMATES)

Asadullah Ahmed, M.D., Joplin, MO  
Jason Michael Andrus, M.D., Brooklyn, NY  
Paris Aristedes Arianas, M.D., Melville, NY  
Jim G. Aukstuolis, M.D., Little Rock, AR  
Muhammad Waqar Azeem, M.D., M.B.B.S., Rocky Hill, CT  
Brian David Barash, M.D., Leawood, KS  
Nasrin Bashiri, M.D., San Mateo, CA  
James Robert Batterson, M.D., Kansas City, MO  
Lisa Renee Benton-Hardy, M.D., Castro Valley, CA  
Sarah Lynn Bisch, M.D., Norfolk, VA  
Nancy Sue Braun, M.D., Lexington, KY  
Beth Ann Brooks, M.D., M.S.A., Lincoln, NE  
Janet Carella, M.D., Concord, NH  
Barbara Herman Center, M.D., Madison, WI  
Suneeta E. Chacko-Varkey, M.D., Westfield, NJ  
Joseph Burton Clem, M.D., Newport News, VA  
Herman Ronald Clements Jr., M.D., Searcy, AR  
Seth Graham Dewey, M.D., N Tonawanda, NY  
Amador Montes Dizon, M.D., Fargo, ND  
Elena Dlugach, M.D., Simpsonville, SC  
Farzaneh Dokhani Shabestari, M.D., Davis, CA  
Farheen Fahim, M.D., Livingston, NJ  
Margot Gina Feintuch, M.D., Nashville, TN  
Michael Francis Fitzpatrick, M.D., Los Angeles, CA  
Cathryn Ann Galanter, M.D., Brooklyn, NY  
Byron Garcia, M.D., Wellesley, MA  
Anna Marie Gonzaga, M.D., Baltimore, MD  
Preetham Grandhi, M.D., White Plains, NY  
Charles Kevin Hawley, M.D., Mahomet, IL  
David Weeks Heilman, M.D., Pacific Grove, CA  
Jeanne G. Holzgreffe, M.D., Ph.D., Washington, DC  
Linda S. Hryhorczuk, M.D., Grosse Pointe, MI  
Daniel Joseph Huesgen, M.D., Minneapolis, MN  
Jeffrey Ivan Hunt, M.D., Cumberland, RI  
Lourdes Teresa Illa-Sanchez, M.D., Miami, FL  
Frank Paul James, M.D., J.D., Waltham, MA  
Tina Aram Jin, M.D., Falls Church, VA  
Paramjit Toor Joshi, M.D., Lutherville, MD  
Darryl Brian Kabins, M.D., Topeka, KS

Kiran Jayesh Kamdar, M.D., Roslyn Heights, NY  
Poonam Khanna, D.O., Leawood, KS  
John George Koutras, M.D., Williston, VT  
Jennifer Sue Lahmann, M.D., La Crosse, WI  
Christopher Lee Lange, M.D., Olney, MD  
Paul Richard Larson, M.D., Oconomowoc, WI  
Nanci L. Lebowitz-Naegeli, M.D., Montclair, NJ  
Robin Cheryl Lessoff, M.D., Burlington, VT  
Suzanne Lind, M.D., Monmouth Junction, NJ  
Margaret Ann Lindsey, M.D., Rochester, NY  
David Leon Lopez, M.D., Stamford, CT  
Alfonso Lopez-Cardona, M.D., Williamsburg, VA  
Joanne Marie Loritz, M.D., Napa, CA  
Todd Douglas Luellen, M.D., Mobile, AL  
Albert Y. Ma, M.D., Bakersfield, CA  
Avram Howard Mack, M.D., Washington, DC  
Lorraine Sangillo Marshall, M.D., Norwood, NJ  
Rosa Martinez-Casuso, M.D., Coral Gables, FL  
Catherine Lapp McCarthy, M.D., Arlington, VA  
Robert Carl McKenzie Jr., D.O., APO, AE  
Tom Anderson Middlebrook, M.D., Nacogdoches, TX  
Serge A. Mitelman, M.D., Brooklyn, NY  
James Joseph Morris, M.D., Ocean Springs, MS  
Ronald Vincent Moruzzi, D.O., Alexandria, VA  
Michael D. Murphy, M.D. M.P.H., Beverly, MA  
Brett Nicole Murphy-Dawson, M.D., Midland, GA  
Jyotsna Nair, M.D., Columbia, MO  
Phillip W. Neuberger, M.D., Anchorage, AK  
Yiu Kee Ng, M.D., New York, NY  
Okechukwu Nkem Nwangburuka, M.D., Elk Grove, CA  
Anne Marie O'Melia, M.D., Mason, OH  
Derek Alan Ott, M.D., Los Angeles, CA  
Resul Kaan Ozbayrak, M.D., Phoenix, AZ  
Drew Alan Pate, M.D., Owings Mills, MD  
Deepak Vinoobhai Patel, M.D., Hopkinsville, KY  
Benjamin David Pe, M.D., Richland, WA  
Claudia Ann Phillips, M.D., Anchorage, AK  
Sigita Plioplys, M.D., Chicago, IL  
Donna Agnes Poplawski, M.D., Fair Oaks, CA

(MOC Child and Adolescent Psychiatry continued)

Javier Moises Prado, M.D., Fort Pierce, FL  
Bernard James Quigley Jr., M.D., Newburgh, ME  
Lorna Ramos-Morel, M.D., Pelham, NY  
Atta-Ur Rehman, M.D., Voorhees, NJ  
David Charles Rettew, M.D., Burlington, VT  
Timothy John Robertson, M.D., Eau Claire, WI  
Robyn Cecelia Robinson, M.D., Ithaca, NY  
Oscar Valdez Rosas, M.D. M.P.H., La Canada, CA  
Lane Gruber Rose, M.D., Little Silver, NJ  
Glenn Richard Saltz, M.D., Aptos, CA  
Kalyani Samudra, M.D., Salt Lake City, UT  
Cynthia Williams Santos, M.D., Houston, TX  
Caryn Beth Schorr, M.D., Aventura, FL  
Deborah Lee Scuglik, M.D., Neenah, WI  
Jess Parker Shatkin, M.D., M.P.H., New York, NY  
Rhea Elena Sherwin, M.D., Dix Hills, NY

Daniel Frederick Shreeve, M.D., Georgetown, TX  
Cindy Lou Slominski, M.D., M.P.H., Long Beach, CA  
Linda Barnes Snyder, M.D., Huntersville, NC  
David Lee Struble, M.D., Memphis, TN  
Heidi Beverley Sulman-Smith, M.D., Los Angeles, CA  
Juanita Lynn Taylor, M.D., Towson, MD  
Eric David Teitel, M.D., New York, NY  
Carlos Felipe Valle, M.D., Kingston, NY  
Christopher R. Van Horn, D.O., Leawood, KS  
Raquel F. Vasquez, M.D., London, KY  
Breda Velasquez, M.D., San Diego, CA  
Marie-Josophe Viard, M.D., New York, NY  
Minerva Villafane-Garcia, M.D., Middletown, PA  
Jutta Edith Vogt, M.D., Ardmore, PA  
Dykes Maxwell Young, M.D., San Francisco, CA  
Manuela Pascolina Zisu, M.D., New York, NY
