# Supplementary material for: 2013 Annual Report of the American Board of Psychiatry and Neurology, Inc.
Source: Atypon-hosted journal article supplement (doi:10.1176/appi.ajp.2014.1710902), 2014-09-01
Supplement: 1015_ds004.pdf [file 1015_ds004.pdf]

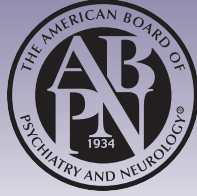

American  
Board of  
Psychiatry and  
Neurology, Inc.

A Member Board of the American Board of Medical Specialties (ABMS)

# ABPN Congratulations

Announcing diplomates of the ABPN for: **Certification in the specialty of Psychiatry awarded January 18, 2013**

## PSYCHIATRY (149 DIPLOMATES)

|                                                     |                                                     |
|-----------------------------------------------------|-----------------------------------------------------|
| Marthe Abraham, M.D., Baldwin, NY                   | Karen Rose Fox, M.D., Chattanooga, TN               |
| Roohi Abubaker, M.D., Atlanta, GA                   | Brandon Andrew Francis, M.D., Augusta, GA           |
| Adnan Masood Ahmad, M.D., Alexandria, VA            | Adam Christopher Frey, M.D., San Francisco, CA      |
| Syed Shoaib Ahmed, M.D., Clarence Center, NY        | Doreen Lanae Fukushima, M.D., Laconia, NH           |
| Ali Altahir, M.D., Woodbridge, VA                   | Manuel Antonio Garcia, M.D., Miami, FL              |
| Ricardo Alvarez, M.D., Astoria, NY                  | Douglas Mervyn Gartrell, M.D., Ellicott City, MD    |
| Guadalupe Aranguena Sharpe, M.D., McAllen, TX       | Benjamin Gersh, M.D., Greenville, NC                |
| Azima Ferdous Ashraf, M.D., Somerset, NJ            | Peter Christopher Gherardi, M.D., Brookline, MA     |
| Sudeshna Basu, M.D., Wethersfield, CT               | Teresa Carmen Gil, M.D., Wantagh, NY                |
| Juan Carlos Belalcazar Canal, M.D., Willmar, MN     | Rebecca Lynn Gladding, M.D., Carmichael, CA         |
| Charles Robert Benson, M.D., Falls Church, VA       | David Lee Goldbloom, M.D., Wayne, NJ                |
| Ajay Bhatia, M.D., Columbus, OH                     | Mario Roberto Gonzalez Torres, M.D., San Juan, PR   |
| Xenia Johnson Bhembe, M.D., Milton, MA              | Francisco Jose Gonzalez-Franco, M.D., New York, NY  |
| Noel Arsenio Cabrera, M.D., Boca Raton, FL          | Kimberly Gordon, M.D., New Orleans, LA              |
| Delane Casiano, M.D., Philadelphia, PA              | Nikki Gordon Skovby, M.D., Holte, n/a               |
| Kenia Castro, M.D., Miami, FL                       | Lisa Llanas Hagberg, M.D., Mattapoisett, MA         |
| Jesse Oscar Cavenar III, M.D., Chapel Hill, NC      | David Barlow Hammer, M.D., Alexandria, VA           |
| Julie Alappat Ceasar, M.D., Metairie, LA            | Brian Andrew Hammock, M.D., Biloxi, MS              |
| Lokaranjit Chalasani, M.D., Okemos, MI              | Elvin Gilberto Hernandez Crespo, M.D. MPH, Moca, PR |
| Jason Patrick Coles, M.D., Grand Rapids, MI         | Stacie Lenore Hitchcock, M.D., Barnstable, MA       |
| Kendra Alise Cornwall, D.O., Portland, ME           | April Dawn Hurt, D.O., Gainesville, FL              |
| Dan Nicolae Cotoman, M.D., Charlotte, NC            | Diana Isachievi, M.D., Wichita Falls, TX            |
| Daniel Joseph Culliford, M.D., Harrison, NY         | Asad Ismail, M.D., Louisville, KY                   |
| Jason Wade Curd, M.D., Ashford, CT                  | Kevin Scott Jones, M.D., Breckenridge, CO           |
| Kristin Aguilar Dalope, M.D., Pittsburgh, PA        | Amanullah Khan, M.D., Mechanicsburg, PA             |
| Barbara Karen Davis, M.D., Langhorne, PA            | Imran Ali Khan, M.D., East Meadow, NY               |
| Ashley Brooks Deaton, M.D., Austin, TX              | Razaullah Khan, M.D., Painted Post, NY              |
| Maria De Jesus Del Sol, M.D., Miami, FL             | Neha A. Khurana, MBBS, Alpharetta, GA               |
| Sameh Fathi Sudki Dwaikat, M.D., Ada, MI            | Yelena Ilinichna Komissarova, M.D., High Point, NC  |
| David Bernal Edgcomb, M.D., New York, NY            | Lauren Korrol, D.O., Sea Cliff, NY                  |
| Kara Victoria Emerson, M.D., Nashville, TN          | Bindu P Koshy, M.D., Hagerstown, MD                 |
| Daniel Marcelo Epelbaum, M.D., Waterbury, CT        | Idriz Kovacevic, M.D., Miami Shores, FL             |
| Jennifer Sarah Errunza, M.D., Westmount, QC         | Judie Marie Kwolek, M.D., Ashland, KY               |
| Kelvin Exum, M.D., Raleigh, NC                      | Kimberly Dawn Law, M.D., M.P.H., Shreveport, LA     |
| Daniel Fallon, M.D., Tampa, FL                      | Tina Le, M.D., Lakewood, CO                         |
| Roseann Darlissa Fana-Perez, M.D., Forest Hills, NY | Lesley Brook Lewis, D.O., Somerdale, NJ             |
| Rehan Ahmad Farooqui, M.D., Melbourne, FL           | Etel Leybovich, M.D., Ossining, NY                  |
| Miguel Flores, M.D., Miami, FL                      | Shih-Tzung Li, M.D., Orlando, FL                    |
| Paige Elizabeth Forrest, M.D., Pittsburgh, PA       | Amy Elizabeth Lister, M.D., Wayland, MA             |

(Psychiatry continued)

|                                                         |                                                     |
|---------------------------------------------------------|-----------------------------------------------------|
| Sangita Kumari Mallick, M.D., Lynnfield, MA             | Nusrat Shafiq, M.D., Rochester, NY                  |
| Aaron D McDaniel, M.D., Pleasantville, NY               | Ashok Praturi Sharma, M.D., Delray Beach, FL        |
| Terry Allen Meden, M.D., Marquette, MI                  | Jonathan Erik Shaywitz, M.D., Beverly Hills, CA     |
| Asad Mehdi, M.D., Duluth, GA                            | Haniel C. Shen, M.D., Templeton, CA                 |
| Lucille Bess Mehring, M.D., Barrington, RI              | Lubna Siddiki, M.D., Plano, TX                      |
| Bruce Michael Meltzer, M.D., Wellesley, MA              | Arshad Uddin Siddiqui, M.D., Jackson, NJ            |
| Saba Memon, M.D., Sugar Land, TX                        | Mark Lawrence Silverman, M.D., Birmingham, MI       |
| Chenel Michel, M.D., Charlotte, NC                      | Gregory Michael Singleton, M.D., Indianapolis, IN   |
| Arlene Nichols Miller, M.D., Whitsett, NC               | Donald A Smith, M.D., Florence, MA                  |
| Niaz Mohammad, M.D., Portage, MI                        | Carolyn Solzhenitsyn, M.D., Cavendish, VT           |
| Lauren Virginia Moran, M.D., Belmont, MA                | Loretta Ann Sonnier, M.D., Cincinnati, OH           |
| Adel Mostafavi, M.D., Los Angeles, CA                   | Justin Kuhns Spooner, M.D., Jacksonville, FL        |
| Syeda Shakeela Munir, M.D., Shreveport, LA              | John Fitzpatrick Sullivan, M.D., Needham, MA        |
| Tanzia Mustafa, M.D., East Elmhurst, NY                 | Eugene Yo-Jen Sun, M.D., Thomasville, GA            |
| Khin Maung Myo, M.D., Middletown, NY                    | Susan M Szulewski, M.D., Wellesley, MA              |
| Lora Lee Hart Pacaldo, M.D., Wilmington, NC             | Grace Ann Tallarico, M.D., New Ipswich, NH          |
| Scott Michael Palyo, M.D., New York, NY                 | Brian Steven Taylor, M.D., Thousand Oaks, CA        |
| Justin James Parrott, M.D., Abilene, TX                 | Damon A Tohtz, M.D., Skaneateles, NY                |
| Onelia Haydee Ramirez-Cook, M.D., Tampa, FL             | Jessica Torres Torres, M.D., Gainesville, FL        |
| Thulasi Ramu Reddy, M.D., New Hyde Park, NY             | Manzoor Mustafa Usman, M.D., Stamford, CT           |
| Aimee Lynn Reinglass, M.D., Brooklyn, NY                | Tamara Vanderwal, M.D., Branford, CT                |
| Carolyn Marie Rekerdres, M.D., Dallas, TX               | Alfredo Joel Velez, M.D., Eugene, OR                |
| Juan Francisco Rodriguez Rossel, M.D., Jonesborough, TN | Hop Van Vu, M.D., Providence, RI                    |
| Jason Michael Rosen, M.D., Washington, DC               | Alexander Robin Nicholas Westphal, M.D., Hamden, CT |
| Donovan Michael Ross, D.O., Hickory, NC                 | Jennifer Lynn Wildpret, D.O., Pittsburgh, PA        |
| Pierre-Yves Jean-Louis Rouzaud, M.D., Rio Rancho, NM    | Silvia Oviedo Williams, M.D., Baltimore, MD         |
| Pronoy Kumar Roy, M.D., Scarsdale, NY                   | Matthew Dean Willis, M.D., MPH, East Greenwich, RI  |
| Zinovi Rozenblat, M.D., Alhambra, CA                    | Katie Elizabeth Wilson, M.D., Cottleville, MO       |
| Cynthia Ann Rutherford, D.O., Stamford, CT              | Jennifer C. Wisdom-Schepers, M.D., Johnson City, TN |
| Reham Alber Adib Sadek, M.D., Palm Harbor, FL           | Padmaja Yalavarti, M.D., Morganville, NJ            |
| Saka Ademola Salami, M.D., Wilmington, NC               | Elizabeth Yoder, D.O., Jacksonville, NC             |
| Usha Rani Sannidhi Venkata, M.B.B.S., Irvine, CA        | Grant Leo Yoder, D.O., New Albany, OH               |
| Carlos Abel Satulovsky, M.D., Hallandale, FL            | Masood Muhammad Zafar, M.D., Sacramento, CA         |
| Catherine Gennings Saxbe, M.D., Williamstown, MA        | Maria Isabel Zapata Vega, M.D., Harker Heights, TX  |
| Shelley Joy Sellinger, M.D., West Hurley, NY            | Salim Zulfiqar, M.D., Mechanicsville, VA            |
| Vithyalakshmi Selvaraj, MBBS, Omaha, NE                 |                                                     |
