# Supplementary material for: 2013 Annual Report of the American Board of Psychiatry and Neurology, Inc.
Source: Atypon-hosted journal article supplement (doi:10.1176/appi.ajp.2014.1710902), 2014-09-01
Supplement: 1015_ds005.pdf [file 1015_ds005.pdf]

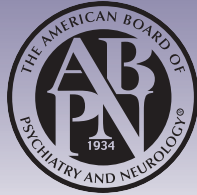

American  
Board of  
Psychiatry and  
Neurology, Inc.

A Member Board of the American Board of Medical Specialties (ABMS)

# ABPN Congratulations

Announcing diplomates of the ABPN for: **Certification in the specialty of Psychiatry awarded April 19, 2013**

## PSYCHIATRY (177 DIPLOMATES)

|                                                     |                                                       |
|-----------------------------------------------------|-------------------------------------------------------|
| Ali Mahmoud Abu Al Hummos, M.D., New York, NY       | Lisa Michelle Delaney Le, M.D., Fenton, MO            |
| Arwa Aburizik, M.D., Coralville, IA                 | Antoine Yvan Demosthene, M.D., Lima, OH               |
| Digisha Agarwal, M.D., Springfield, IL              | Priya Sarin Desai, M.D., Manhattan Beach, CA          |
| Abdulhafiz Aminmohamed Ahmed, M.D., Manlius, NY     | Sara Dhand, M.D., West Covina, CA                     |
| S. M. Anwar Ahmed, M.D., Elmira, NY                 | Audrey Prisca Dumas, M.D., Denver, CO                 |
| Jeffrey David Alden, M.D., Coralville, IA           | Kim Nancy S. Duque, M.D., Syracuse, NY                |
| Karuna Anand, M.D., Roseville, CA                   | Mahmoud Ahmed Elfatah, M.D., Macungie, PA             |
| Mariam H Asar, M.D., Potsdam, NY                    | Oscar Estrada, M.D., Costa Mesa, CA                   |
| Cheryl Bailey Salary, M.D., Centerville, OH         | Frederick Joseph Falvo Jr., M.D., Redlands, CA        |
| Steven Leo Balt, M.D., Lafayette, CA                | Scott Clark Fears, M.D., Los Angeles, CA              |
| Pauline Louise Bartle, M.D., Seattle, WA            | Mark Andrew Fischer, M.D., Sycamore, IL               |
| Seema Basnett, M.D., Pearland, TX                   | Nomi Judith Fredrick, M.D., Oxnard, CA                |
| Kristen Gentry Baus, M.D., New Philadelphia, OH     | Richard Dale Frishman, M.D., Napa, CA                 |
| Mary Ellen Beegle, D.O., Sedalia, MO                | Nicodemus Jimenez Garcia, M.D., San Diego, CA         |
| Mounir Belcadi, M.D., Ventura, CA                   | Jaime Avra Gardner, M.D., Reno, NV                    |
| Ritu Smita Bhatnagar, M.D. MPH, Madison, WI         | Donna Renee Gill, M.D., Westfield, IN                 |
| Sanjiwan S. Boparai, M.D., Elk Grove, CA            | Nadia K. Gill, M.D., Granville, OH                    |
| Djillali Boudjenah, M.D., Richardson, TX            | Philip William Girling, M.D., Jackson, WY             |
| Bronya Boykin-Sullivan, M.D., Columbus, OH          | Alexander Zaler Golbin, M.D., Northbrook, IL          |
| James P. Brady, M.D., Bryn Mawr, PA                 | Elia Raquel Gonzalez Rodriguez, M.D., Layton, UT      |
| Luke Samuel Brewton, M.D., Eugene, OR               | Monica Raposo Gocos, M.D., Wichita, KS                |
| Abdul Qadir Brula, M.D., Schenectady, NY            | Cynthia Gordon, M.D., Wilmette, IL                    |
| Richard Ebert Burton, M.D., Gilbert, AZ             | Marilyn Griffin, M.D., Chicago, IL                    |
| Katherine Kovalski Busby, M.D., Chagrin Falls, OH   | Emily Marie Grossell, M.D., Salt Lake City, UT        |
| Pedro Manuel Bustamante IV, M.D., Houston, TX       | Matthew Wainwright Grover, M.D., Long Island City, NY |
| Steven Richard Calleros, M.D., Yorba Linda, CA      | Jenifer Karine Gunther, M.D., Oceanside, CA           |
| Wynnelena Canlas Canio, M.D., Petaluma, CA          | Elizabeth Lynn Halvorsen, M.D., Guilford, CT          |
| Joseph Robert Carbone, M.D., Cortlandt Manor, NY    | Alysia Young Han, M.D., Oakland, CA                   |
| Nicole Leigh Carlberg, D.O., Coeur D Alene, ID      | Shadia Fahmy Hanna, M.D., Marcy, NY                   |
| Craig Carpenter, M.D., Galena, OH                   | Gregory M Hawley, M.D., La Grange, IL                 |
| Wei Chen, M.D., Horseheads, NY                      | Muneeza K. Hayee, M.D., Lucas, TX                     |
| Peilin Alice Cheng, M.D., Arcadia, CA               | Gretchen Anne Hein, D.O., Vancouver, WA               |
| Valeriy Chernov, M.D., Brooklyn, NY                 | Christa Louise Hines, M.D., Saint Louis, MO           |
| Heather Ann Colbert, M.D., Ph.D., Mountain View, CA | Avneet Singh Hira, M.D., Granville, OH                |
| Eugenio Contreras IV, M.D., Webster, NY             | Jonathan Julian Howard, M.D., Glen Ellyn, IL          |
| John Richard Cooke, M.D., Montclair, NJ             | Heather Chienyu Huang, M.D., Madison, WI              |
| Cristina Cusin, M.D., Winchester, MA                | Andrew Warren Hunt, M.D., Bay Village, OH             |
| Traciann Philomena Dalmeida, M.D., Pittsburgh, PA   | Junaid Akhtar Hussain, M.D., Mechanicsburg, PA        |
| Paulina K Degraft-Johnson, M.D., De Pere, WI        | Eugene Aineronmiton Ikhimiukor, M.D., Rancho          |

(Psychiatry continued)

|                                                       |                                                      |
|-------------------------------------------------------|------------------------------------------------------|
| Claudia Petruta Iordache, M.D., Rego Park, NY         | Vanajakshi Paturu, M.D., Austin, TX                  |
| Lena Lachelle Jefferson Wilson, M.D., Cincinnati, OH  | Eunice Ragland Peterson, M.D., Travelers Rest, SC    |
| Jada Jaria Johnson, M.D., Chicago, IL                 | Amy W. Poon, M.D., Stanford, CA                      |
| Nicole Corlenne Jones-Martinez, M.D., Berwyn, IL      | Vincent Allen Porter, M.D., Madison, IN              |
| Carlos Jordan Manzano, M.D., Palos Verdes Estates, CA | Vasilis K Pozios, M.D., Harrison Township, MI        |
| Nicholas Bryan Kammerer, M.D., Napa, CA               | William Maurice Redden, M.D., Saint Louis, MO        |
| Ajmal Muhammad Khan, M.D., Birmingham, AL             | Maria Teresa Rivas Torres, M.D., Sacramento, CA      |
| Aqeel Ahmed Khan, M.D., Bloomingdale, IL              | Babak Roshanaei-Moghaddam, M.D., Portland, OR        |
| Mohammad Amjadullah Khan, M.D., Round Rock, TX        | Bruce Michael Ruekberg, M.D., Prescott, AZ           |
| Shahin Khashayar, M.D., Marina Del Rey, CA            | Simardeep Kaur Sandhu, M.D., Murphy, TX              |
| Sehar A Khokher, M.D., Bangor, ME                     | Paola Adel Sansur, M.D., Lutherville, MD             |
| Thomas Je-Hyun Kim, M.D., M.P.H., Austin, TX          | David Michael Scarpino, M.D., Huntington Beach, CA   |
| Jonathan Austin Kistler, M.D., San Diego, CA          | James Ryan Shackelford, M.D., Oakland, CA            |
| Nathan Kolla, M.D., Toronto, ON                       | Elena Sharipova, M.D., Wahiawa, HI                   |
| Arthur Kopp, M.D., Playa Vista, CA                    | Mahvash Zahra Sheikh, M.D., Hummelstown, PA          |
| Nirmala Kurian, M.D., Columbia, MO                    | Aikiesha Nicole Shelby, M.D., Longwood, FL           |
| Shiva Kumar Lam, M.D., Austin, TX                     | Sandra Jean Shelmerdine, M.D., San Antonio, TX       |
| Eric Michael Layne, M.D., New Albany, OH              | Benjamin Isaac Shepherd, M.D., Walnut, IL            |
| Emily Liffick, M.D., Carmel, IN                       | Mohammad Shoiab, M.D., Omaha, NE                     |
| Christopher Kenneth Lind, M.D., Kapolei, HI           | Gilbert Manuel Simas, M.D., Portland, OR             |
| Kurtis Philip Lindeman, M.D., La Mesa, CA             | Alisha Renee Smith, M.D., Inglewood, CA              |
| Jasmine Maan, M.D., Strongsville, OH                  | Stanislav Spivak, M.D., Baltimore, MD                |
| Michael S Mamoun, M.D., Los Angeles, CA               | Bruce Robert Swarny, M.D., Glendive, MT              |
| Navreet Mann, M.D., Folsom, CA                        | Stanley Joseph Szwast, M.D., Fishers, IN             |
| Scott Frederick Martin, M.D., Cleveland, OH           | Felisa Padua Tacata, M.D., Sacramento, CA            |
| Chanda Lajai Mayers-Elder, M.D., Humble, TX           | Emelita Borja Talag, M.D., Culver City, CA           |
| Lorna Korinne Mayo, M.D., MPH, Wilder, VT             | Nickitas B. Thomarios, D.O., Bloomington, MN         |
| Julia Leshar McGhee, M.D. MPH, Los Angeles, CA        | Upton Haskin Thomas III, M.D., South Milwaukee, WI   |
| Maria Cristina Non Mendoza, M.D., Kensington, CA      | Rebecca Saben Timme, D.O., Ukiah, CA                 |
| Christine Michaud, M.D., Naperville, IL               | Brian Timothy Daniel Tobe, M.D. Ph.D., San Diego, CA |
| Rihab Mohamed, M.D., Brecksville, OH                  | Timothy Lee Todd, M.D., Alto, MI                     |
| Alexander Morrill, M.D., Park Ridge, IL               | Christine Ann Trueblood, M.D., Kansas City, MO       |
| Jonathan Morrow, M.D., Ann Arbor, MI                  | Valerie Jones Tutson, M.D., Los Angeles, CA          |
| Syed Rashid Mumtaz, M.D., Fort Wayne, IN              | Nancy Tyler, M.D., Glenview, IL                      |
| Syed Jamal Mustafa, M.D., Bothell, WA                 | Muhammad Zafar Uddin, M.D., Roseville, CA            |
| Almos Istvan Nagy, M.D., Chichester, NH               | Erin Rose Ulano, D.O., Havre, MT                     |
| Shamsun Nahar, M.D., Dublin, OH                       | Sajoy Purathumuriyil Varghese, M.D., Lincolnwood, IL |
| Parvathi Nanjundiah, M.D., Hudson, OH                 | Kevin Thurman Vicenti, M.D. MS, Albuquerque, NM      |
| Zafar Nafis Naqvi, M.D., Northborough, MA             | Eleanor Berger Vo, M.D., Roosevelt, NJ               |
| Rand Khouri Nemeh, M.D., Sioux Falls, SD              | Brian Eugene Waiblinger, M.D., Seattle, WA           |
| Sudhanshu Yeshwant Nene, M.D., Higley, AZ             | Arvinder Pal Singh Walia, M.D., Austin, TX           |
| Jarvis B. Ngati, M.D., Rancho Cucamonga, CA           | Gony Alexandra Weiss, M.D., New City, NY             |
| Joshua Esinwoke Nnanji, M.D., Caro, MI                | Ricardo J. Whyte Hall, M.D., Loma Linda, CA          |
| Rosemary Odoaru Odocha, M.D., Saint Petersburg, FL    | Qun Wu, M.D., Chicago, IL                            |
| Vincent Chuky-Naddy Okabekwa, M.D., Jersey City, NJ   | Guohua Xia, M.D., Ph.D., Davis, CA                   |
| Lindsay Rae Ormsby, M.D., Ottawa, OH                  | Todd Benjamin Young, M.D., San Diego, CA             |
| Nathan Forrest Osborn, M.D., Bend, OR                 | Azhar Mahmood Yunus, M.D., Brookfield, WI            |
| Pavan Pancholy, M.D., Tampa, FL                       | Syed Iftikhar Haider Zaidi, M.D., Alexandria, VA     |
| Shahida Parveen, M.D., San Diego, CA                  | Solomon G. Zaraa, D.O., Pepper Pike, OH              |
| Parool Babubhai Patel, M.D., Irvine, CA               |                                                      |
