# Supplementary material for: 2013 Annual Report of the American Board of Psychiatry and Neurology, Inc.
Source: Atypon-hosted journal article supplement (doi:10.1176/appi.ajp.2014.1710902), 2014-09-01
Supplement: 1015_ds006.pdf [file 1015_ds006.pdf]

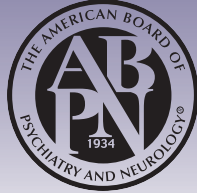

American  
Board of  
Psychiatry and  
Neurology, Inc.

A Member Board of the American Board of Medical Specialties (ABMS)

# ABPN Congratulations

Announcing diplomates of the ABPN for: **Certification in the specialty of Psychiatry awarded September 23, 2013**

## PSYCHIATRY (1,265 DIPLOMATES)

Omar Abbasi, M.D., Philadelphia, PA  
Deana G. Abdel-Reheim, M.D., Temple, TX  
Karen Abdool, M.D., PhD, Medford, MA  
Marilena Achim, M.D., Hudson, OH  
Otema Alice Adade, M.D., Arlington, VA  
Heather Rene Adams, D.O., Denver, CO  
Adewumi Tunde Adebomojo, M.D., Dothan, AL  
Nazia Sadaf Adil, M.D., Plymouth, MI  
Benjamin Andrew Adler, M.D., Corvallis, OR  
Amy Agrawal, M.D., Cambridge, MA  
Patricia Aguayo Rosas, M.D., Woodbridge, CT  
Jorge Aguilar-Zanatta, M.D., McAllen, TX  
Faizi Ahmed, M.D., Drescher, PA  
Samara Mansour Ahmed, M.B.B.S., Brooklyn, NY  
Reno Kumari Ahuja, M.D., Carbondale, IL  
Sadeq Al-Sarraf, M.D., Niles, IL  
Ashley Jade Albarado, M.D., Baton Rouge, LA  
Aaron Albert, M.D., Carolina Beach, NC  
Elizabeth Streicker Albertini, M.D., New York, NY  
Mitzi Montgomery Albright, M.D., Evans, GA  
Britany EV Moore Alexander, M.D., Garden Grove, CA  
Janna Elizabeth Alfery, M.D., La Jolla, CA  
Nevine D Ali, M.D., MPH, Brooklyn, NY  
Shahla Ali, M.D., Allen, TX  
Aliya Nargis Ali-Nazimuddin, M.D., Lombard, IL  
Manish Aligeti, M.D., Lubbock, TX  
Jennifer Elizabeth Alkema, M.D., Ann Arbor, MI  
Tina Marie Allee, M.D., Orange, CA  
Mark Robert Allen, M.D., New York, NY  
Santiago Alberto Almanzar Disla, M.D., Columbia, MO  
Tahani Abdu Alqassem, M.D., Arlington, VA  
Nadia Alvi, D.O., Justice, IL  
Huda Yahya Alyahyawi, M.D., Boston, MA  
Ashley Amar, M.D., Waco, TX  
Amina Amin, M.B.B.S., Columbia, MO  
Binyamin Amrami, M.D., Los Angeles, CA  
Chrisantha Anandappa, M.D., River Forest, IL  
Michael Ang-Rabanes, M.D., Morgantown, WV  
Ebere Andrew Anokwuru, M.D., Hollidaysburg, PA

Kristina Marie Antonson, M.D., Sacramento, CA  
Chukwuemeka Alexander Anyake, M.D., Plymouth, MN  
Okah Justin Anyokwu, M.D., Columbia, MO  
Aya Cristin Aoshima-Kilroy, M.D., Houston, TX  
Alexis Aplasca, M.D., Glen Allen, VA  
Frank Appah, M.D., Hamden, CT  
Jacob M. Appel, M.D., New York, NY  
Anjela K. Arbogast, M.D., Radford, VA  
Luke Archibald, M.D., New York, NY  
Julie Ann Uy Arellano, M.D., Troy, MI  
Michael Ogonnaya Arisa, M.D., Kearney, NE  
Peter Saulius Armanas, D.O., Woodstock, MD  
Alexis Diane Armenakis, M.D., San Francisco, CA  
Gurvinder Singh Arora, M.D., Oak Park, IL  
Nevin Arora, M.D., Mountain View, CA  
Thomas Louis Atkins, M.D., Ann Arbor, MI  
Rania Attia, M.D., West Long Branch, NJ  
Reji Attupurath, M.D., Medford, MA  
David Wade Atwood, M.D., Chula Vista, CA  
Francisco Rafael Audivert, M.D., Miami, FL  
Michael Auza, M.D., Daly City, CA  
Janki Modi Avari, M.D., White Plains, NY  
Jonathan David Avery, M.D., New York, NY  
Louisa Ayafor, M.D., Ahsoskie, NC  
Naila Azhar, M.D., Farmington, CT  
Joshua P Babu, M.D., Madison, WI  
Matthew Thomas Bader, M.D., Charleston, SC  
Florian Bahr, M.D., Bratenahl, OH  
Moni Baidya, M.D., Charlottesville, VA  
Muhammad Rais Baig, M.D., San Antonio, TX  
Sepideh Bajestan, M.D., Palo Alto, CA  
Siddharth Bajpai, M.D., Iowa City, IA  
Samuel W Baker, M.D., Wayne, PA  
Meera Balasubramaniam, M.B.B.S., Jersey City, NJ  
Gamze Balci Camsari, M.D., Jacksonville, FL  
Percy Ray Ballard, M.D., Boston, MA  
Arjun Bansal, M.D., Seattle, WA  
Nadia Barati, M.D., Los Angeles, CA  
Argelinda Baroni, M.D., New York, NY

(Psychiatry, continued)

|                                                       |                                                        |
|-------------------------------------------------------|--------------------------------------------------------|
| Emile Andrew Barrouk, M.D., Hodges, SC                | Hassan Ayaz Bokhari, M.D., Gaithersburg, MD            |
| Venkatesh Basappa Krishnamurthy, M.D., Detroit, MI    | John Michael Bonetti, D.O., Unionville, CT             |
| Omar Bashayan, M.D., New York, NY                     | Megan Borkon, M.D., Nashville, TN                      |
| Pravesh Basnet, MD, Springfield, IL                   | Kathryn Sue Borman, D.O., M.Ph., Yankton, SD           |
| Feyza Basoglu, M.D., Burlington, VT                   | Elizabeth Botts, M.D., Nashville, TN                   |
| Ashley Nicole Bassett, M.D., Chicago, IL              | Amy Boudreau, M.D., Richland, WA                       |
| Moanis Karam Hilmy Bastawrous, M.D., Delray Beach, FL | Jennifer Marie Bowden, M.D., Cincinnati, OH            |
| Abra Lee Bates, M.D., Cincinnati, OH                  | Adina Elise Bowe, M.D., New Haven, CT                  |
| Smitha Battula, MBBS, M.D., Albany, GA                | Katrina Bozada, M.D., Dexter, MI                       |
| Leah Kathryn Bauer, M.D., Brunswick, ME               | Brady Bradshaw, M.D., Miami, FL                        |
| Marvin M. Baula, M.D., Fairborn, OH                   | Jennifer Rebecca Breitbart, M.D., New York, NY         |
| Pedro Bauza, M.D., Philadelphia, PA                   | Jeffrey E Brichta, D.O., Tucson, AZ                    |
| Raman Baweja, M.D., Hummelstown, PA                   | Alexandra Bright, M.D., Seattle, WA                    |
| Ami S. Baxi, M.D., Middletown, NY                     | Matthew James Brockwell, M.D., Oakland, CA             |
| Lama R Bazzi, M.D., Cleveland, OH                     | Michael Alan Brooks, D.O., J.D., Columbus, OH          |
| Kathy Sue Becher, M.D., Westborough, MA               | Aaron A Brown, D.O., Sherman, TX                       |
| Billy Floyd Beck, M.D., Charleston, SC                | Charles Alfred Brown, M.D., Cleveland, OH              |
| Michael Arl Beck, M.D., West Babylon, NY              | Erick Michael Brown, D.O., Overland Park, KS           |
| Jonathan Essary Becker, D.O., Nashville, TN           | Leigh Andrina Brown, D.O., Austin, TX                  |
| Stephan Becker, M.D., Cleveland, TN                   | Kim C. Brownell, M.D., Glastonbury, CT                 |
| Brian Denney Becker Broncheau, M.D., Windsor, CT      | Sarah Brunelle, M.D., Saint-Leonard, QC                |
| Melissa Begolli, M.D., New York, NY                   | Jing Bu, M.D., Quincy, MA                              |
| Rebecca Ariel Begtrup, D.O. MPH, Baltimore, MD        | Jonathan Roy Buchholz, M.D., Seattle, WA               |
| Jacob Behrens, M.D., Madison, WI                      | Crystal Rose Bullard, M.D., Charlotte, NC              |
| Carla Bejjani, M.D., Houston, TX                      | Isis Irenne Burgos-Chapman, M.D., New Haven, CT        |
| Cecilia Belardinelli, M.D., Summit, NJ                | Davita Meara Burkhead-Weiner, M.D., Ann Arbor, MI      |
| Catalina Belean, M.D., Clayton, MO                    | Stephen Lamar Burkholder, M.D., Chambersburg, PA       |
| Colleen Elizabeth Bell, M.D., Fernandina Beach, FL    | Sari Jaclyn Burns, M.D., New York, NY                  |
| Patrice Bellanti, M.D., Maumee, OH                    | Rebecca Rose Burson, D.O., San Antonio, TX             |
| Karlo Beltran, M.D., Overland Park, KS                | Adam Sanford Burstein, D.O., Denver, CO                |
| Kyle Benner, M.D., Seattle, WA                        | Joao Busnello, M.D., Ph.D., Chicago, IL                |
| Jeremy W. Bennett, M.D., Williamsport, PA             | Sarah Elise Butler, M.D., Highlands Ranch, CO          |
| Rachel Anne Bennett, M.D., Merchantville, NJ          | Carissa Caban Aleman, M.D., Brooklyn, NY               |
| Cesar Ruben Berdeja, M.D., Campbell, CA               | Jennifer Cabrera, M.D., Oakland Gardens, NY            |
| Michael John Bergan, M.D., Sioux Falls, SD            | Sabrina Mabel Caceres, D.O., Jacksonville, FL          |
| Christopher Berger, M.D., Redlands, CA                | Elizabeth Anne Calvin, M.D., Aurora, CO                |
| Marianne Bergheim, M.D., La Jolla, CA                 | Paul Champion, M.D., New York, NY                      |
| Rebecca Dawn Berghorst, M.D., Chandler, AZ            | Holly Hollon Cannon, D.O., Crowley, TX                 |
| Meredith Bergman, M.D., New York, NY                  | Justin Capote, M.D., Montclair, NJ                     |
| Shivani Beri, D.O., Mountain View, CA                 | Patricia Caraballo Osorio, M.D., Overland Park, KS     |
| Elsie Yamile Bermudez Pouchard, M.D., El Paso, TX     | Luigi Cardella, M.D., Saint Louis, MO                  |
| Oliver Thomas Bernhardt, D.O., Austin, TX             | Kevin Joseph Carl, M.D., Pittsburgh, PA                |
| Terrence Carter Bethea, M.D., Burlington, NC          | Anthony Robert Carlino, M.D., Wallingford, PA          |
| Yubaraj Bhandari, M.D., Dubois, PA                    | Kristen Lynn Carlo-Francisco, D.O., East Brunswick, NJ |
| Nita S. Bhatia, D.O., Wappingers Falls, NY            | Claudia Carmona, M.D., Redlands, CA                    |
| Hetal Babulal Bhingradia, M.D., New York, NY          | Michael Thomas Carpenter, M.D., Providence, RI         |
| Shabnamzehra Pyarali Bhojani, M.D., Forest Hills, NY  | Vanessa Carroll, M.D., Cliffside Park, NJ              |
| Sarbjit S. Bhullar, M.D., Elk Grove, CA               | Sylvia Cartwright, M.D., San Diego, CA                 |
| Drew Bianchi, M.D., New York, NY                      | Rachel M. Cash, M.D., Middletown, OH                   |
| Naomi Grace Bikle, M.D., Anaheim, CA                  | Flavio Casoy, M.D., New York, NY                       |
| Ankur Bindal, M.B.B.S., Yuma, AZ                      | Shannon Caspersen, M.D., New York, NY                  |
| Deborah Anne Birnbaum, D.O., San Diego, CA            | Brian Joseph Cassmassi, M.D., West Hollywood, CA       |
| Stephen Major Bischoff, M.D., Edison, NJ              | Jack Castro, M.D., Bronx, NY                           |
| Namratha Boda, M.B.B.S., Portsmouth, NH               | Tracey Chantell Cawthorn, M.D., San Antonio, TX        |
| Mahdieh Bodaghi, M.D., San Antonio, TX                | Michael Centorino, M.D., Tampa, FL                     |
| Maria Bodic, M.D., Brooklyn, NY                       | Jacob Andrew Chacko, M.D., San Francisco, CA           |

(Psychiatry continued)

|                                                         |                                                    |
|---------------------------------------------------------|----------------------------------------------------|
| Bryan Jamar Chamberlain, M.D., Los Angeles, CA          | Alex Cutler, M.D., New York, NY                    |
| Sushma Chandramouli, M.D., Ann Arbor, MI                | Bradley Cutler, M.D., Wheaton, IL                  |
| Dennis Ta-Jen Chang, M.D., Las Vegas, NV                | Julie Cyriac, M.D., New Hyde Park, NY              |
| Shin Bey Chang, M.D., Baltimore, MD                     | Neisha D'Souza, M.D., Portland, OR                 |
| Jason Matthew Chapman, D.O., Arcadia, CA                | Stephanie Marie Daly, M.D., Longmeadow, MA         |
| Stephanie Rene Chapman, D.O., Columbia, SC              | Daniel Andrew Danczyk, M.D., Minneapolis, MN       |
| Amol Anil Chaugule, M.D., Hershey, PA                   | Jonathan Dargo, M.D., Grandville, MI               |
| Luis Guillermo Chaves Villamil, M.D., Miami, FL         | Veronica Dave, M.D., Brookfield, WI                |
| Jatinder Mohan Chawla, M.D., Kew Gardens, NY            | Raymond Davidson, M.D., Honolulu, HI               |
| Christopher Chee, D.O., Daly City, CA                   | Amelia Ann Davis, M.D., Gainesville, FL            |
| Jeffrey Chen, M.D., Seattle, WA                         | Joan Elizabeth Davis, M.D., Spokane, WA            |
| Justin Albert Chen, M.D., Boston, MA                    | Edwin Romel Soriano De Leon, M.D., Fullerton, CA   |
| Steve Soman Chennankara, M.D., Belton, TX               | Cesar Eduardo De Paz, M.D., San Antonio, TX        |
| Vitaly Chikrizov, M.D., Wilsonville, OR                 | Jacqueline S. Decker, D.O., Flushing, NY           |
| Damien Francis Chiodo, M.D., Wharton, NJ                | Anthony James Dedousis, M.D., Carrboro, NC         |
| Khaja Najibuddin Chisty, M.D., Northglenn, CO           | Diana Dawn Deister, M.D., Brookline, MA            |
| Elizabeth Chmelik, M.D., Seattle, WA                    | Felicia DeJesus, M.D., Lancaster, PA               |
| Hyong Jin Cho, M.D., Los Angeles, CA                    | Jean Michelle Del Valle, M.D., Tampa, FL           |
| Helen Choi, M.D., New York, NY                          | Shannon Lynne Delaney, M.D., New York, NY          |
| Tanishia DeSha Choice, M.D., Cambridge, MA              | Lawrence John Delay, M.D., Wauwatosha, WI          |
| Deepti Arun Chopra, MBBS, Hartford, CT                  | Jessica Cipoletti Derreberry, M.D., Huntington, WV |
| Noshin Chowdhury, M.D., Bardonia, NY                    | Todd Michael Derreberry, M.D., Huntington, WV      |
| Nicole Victoria Christian, M.D., Dedham, MA             | Ravi Bartholomew DeSilva, M.D., New York, NY       |
| Michael Matthew Christo, M.D., Charlotte, NC            | Jonathan Robert Dettmer, M.D., Camp Lejeune, NC    |
| Letitia Danielle Chukwumah, M.D., Panama City Beach, FL | Dana Blair DeVito, M.D., New York, NY              |
| JunMO Jon Chung, M.D., North Charleston, SC             | Dustin Zane DeYoung, M.D., Los Angeles, CA         |
| Jessica Marie Cici, M.D., Minneapolis, MN               | Madhusmita Dhakal, M.B.B.S., Shrewsbury, MA        |
| Alysia Ann Cirona-Singh, M.D., San Francisco, CA        | Deanna Lee Dial, D.O., Flower Mound, TX            |
| Edward Williams Clark, M.D., Dallas, TX                 | Nery Diaz, D.O., West Haven, CT                    |
| Gina Marie Clark, M.D., D.Phil., Oakland, CA            | Anna Lopatin Dickerman, M.D., New York, NY         |
| Jessica Clark, M.D., New Orleans, LA                    | Katharine E. Dickson, M.D., Chicago, IL            |
| Katherine Chamberlaine Clark, M.D., Chestnut Hill, MA   | Lashire Diegue, M.D., East Orange, NJ              |
| Laurel Clark, M.D., Chicago, IL                         | Erin Rose Dillon-Naftolin, M.D., Seattle, WA       |
| Peter Joseph Clark, D.O., North Brunswick, NJ           | Kelly Wyatt Dion, M.D., Columbia, SC               |
| Lisa Clement, M.D., Madison, WI                         | Nikita Noel Dixon, M.D., San Diego, CA             |
| Samuel Clinch, M.D., Westminster, CO                    | Karen Sue Dobias, D.O., Ypsilanti, MI              |
| John Coates, M.D., Charleston, SC                       | Trudy Dockins, D.O., Mesa, AZ                      |
| Sara Marie Coffey, D.O., Somerville, MA                 | Ingrid Leah Dombrower, M.D., Los Angeles, CA       |
| Mia Gintoft Cohen, M.D., White Plains, NY               | Jennifer Domingo, M.D., El Paso, TX                |
| Stacy A Cohen, M.D., Los Angeles, CA                    | Beili Dong, M.D., MPH, Chevy Chase, MD             |
| Sarah Karpel Coker, M.D., Charleston, SC                | Yu Dong, M.D., PhD., Boyds, MD                     |
| Jacquelyn Marie Collura, M.D., Pittsburgh, PA           | Julia Dorfman, M.D., Washington, DC                |
| Jairo David Colón Agront, M.D., Aguadilla, PR           | Meitra Leigh Doty, M.D., Dallas, TX                |
| Teresa Dean Cone, M.D., Decatur, GA                     | Sahar Douek, M.D., Sherman Oaks, CA                |
| Ellen Davis Conroy, D.O., Wallingford, PA               | John Christian Douglas, M.D., New York, NY         |
| Valeria Contreras, M.D., Houston, TX                    | Amy Lynn Dowell, M.D., Spokane, WA                 |
| Erin Elizabeth Cordero, M.D., Glastonbury, CT           | Noah Christopher Downie, M.D., Columbia, SC        |
| Jaclyn Nicole Crawford, M.D., West Chester, PA          | Ye Beverly Du, M.D., Houston, TX                   |
| Fredrick Crow, M.D., Medford, MA                        | Yuanli Duan, M.D., East Meadow, NY                 |
| Joseph Crozier, M.D., Durham, NC                        | Anish Ranjan Dube, M.D., Philadelphia, PA          |
| Calvin Cruz, M.D., Brooklyn, NY                         | John Wylder DuBose, M.D., Dallas, TX               |
| Laura Elizabeth Csere, D.O., Sacramento, CA             | Michelle Durham, M.D., New Haven, CT               |
| Brett Irish Cunningham, M.D., Ft. Sill, OK              | Abigail Joy Dwiggin, M.D., Virginia Beach, VA      |
| Leigh Cunningham, M.D., Houston, TX                     | Scott Alan Eader, D.O., West Point, KY             |
| Christine Curcio, D.O., Jamaica, NY                     | Andres A. Eboli, M.D., Quincy, MA                  |
| Brian T Cuthbertson, M.D., Mission, KS                  | Osamede Edokpolo, M.D., Springfield, MO            |

(Psychiatry continued)

|                                                    |                                                       |
|----------------------------------------------------|-------------------------------------------------------|
| Eric Martin Edwards, M.D., Chicago, IL             | Ryan M Fugate, M.D., Lawrenceville, NJ                |
| Claudine Jeanette Egol, M.D., Mamaroneck, NY       | Lawrence Kwok-kit Fung, M.D., Palo Alto, CA           |
| Jeffrey Curtis Eisen, M.D., Charlestown, MA        | Amy Beth Funkenstein, M.D., Providence, RI            |
| Hetty Beth Eisenberg, M.D., San Francisco, CA      | Meghan Elizabeth Gaare, M.D., Baltimore, MD           |
| Nezar Ali El-Ruwie, M.D., Ballwin, MO              | Michael C. Gadbaw, M.D., Redwood City, CA             |
| Ben Elitzur, M.D., San Francisco, CA               | Sumana Gadde, M.D., Parkersburg, WV                   |
| Amanda Courtney Elliott, D.O., Walford, IA         | Milind Satish Gadgil, M.D., Denver, CO                |
| Ahmed Z Elmaadawi, M.D., Granger, IN               | Ebony Delaiusm Gaffney, M.D., Pooler, GA              |
| Khalid Abdelsalam Elnagar, M.D., Albany, NY        | Bhavinkumar B Gajera, M.D., Paramus, NJ               |
| Nonso Ekene Enekwechi, M.D., MPH, New York, NY     | Anthony Patrick Gale, M.D., APO, AE                   |
| Marta Shala Erlich, M.D., Bellingham, WA           | Baiju Sudhir Gandhi, M.D., Washington, DC             |
| Matthew D. Erlich, M.D., New York, NY              | Melissa A. Gannage, M.D., Hazelhurst, WI              |
| Katherine Ervin, M.D., Katonah, NY                 | Alissa Renee Rescigno Garcia, M.D., Aiea, HI          |
| Saeed Eshraghi, M.D., Redondo Beach, CA            | Nidhi Garg, M.D., Hummelstown, PA                     |
| Neevon Carl Esmaili, M.D., Los Angeles, CA         | Katrina Garvey, M.D., Dallas, TX                      |
| Fernando Espi Forcen, M.D., Chicago, IL            | Timothy Garvey, M.D., Anaheim, CA                     |
| Kristi Rae Estabrook, M.D., Fox Point, WI          | Gabriel Rudolph Garza, M.D., Austin, TX               |
| Danae Ann Evans, M.D., Atlanta, GA                 | Gretchenjan Gavero, D.O., Honolulu, HI                |
| Elizabeth Anne Evans, M.D., New York, NY           | Paul Geha, M.D., New Haven, CT                        |
| Chudi Christian Eyiuche, M.D., Valley Stream, NY   | Bethany Maria Geib-Rosch, M.D., Durham, NC            |
| Tara Eyma, M.D., Valley Stream, NY                 | Adriel Gerard, M.D., Brooklyn, NY                     |
| Rodrigo Falcao, M.D., Northampton, MA              | Sherry Labib Gergis, M.D., Windermere, FL             |
| Brian Falls, M.D., Sacramento, CA                  | Ted Avi Gerstenblith, M.D., Boston, MA                |
| Jether Christian Farino, M.D., Ocean Springs, MS   | George Chengalathu Gettys, M.D., Lincolnwood, IL      |
| Sabeen Faris, M.D., Glen Oaks, NY                  | Sharmin Ghaznavi, M.D., Ph.D., Cambridge, MA          |
| Umer Farooq, M.B.B.S., Grand Rapids, MI            | Janak Harendra Ghelani, M.D., Gardendale, AL          |
| Abbey Lynn Faruzzo, D.O., Sea Cliff, NY            | Carmen A. Gheorghiu, M.D., Cranberry Township, PA     |
| Hassan Mohamed Fathy, M.B.Ch.B., Providence, RI    | Dina Ghoneim, M.D., New York, NY                      |
| Azim Fatima, M.B.B.S., Plano, TX                   | M Rameen Ghorieshi, MD, MPH, Palo Alto, CA            |
| Ujala Fawad, M.D., Sharon, MA                      | Biswarup Manojkumar Ghosh, M.B.B.S, Williamsville, NY |
| Sarah McMillen Fayad, M.D., Ocala, FL              | Nicole Marie Gibler, M.D., Cincinnati, OH             |
| Gabriela Feier, M.D., Brecksville, OH              | Reyna Gilmore, M.D., Fairfield, OH                    |
| Trace Isaiah Fender, M.D., Asheville, NC           | Soudabeh Givrad, M.D., Burlingame, CA                 |
| Serena Fernandes, M.D., Boston, MA                 | Robert Clifton Glenn, M.D., Johns Island, SC          |
| Julia Paige Fernandez, M.D., Gulf Breeze, FL       | Nicole Eid Gloff, M.D., Catonsville, MD               |
| Pedro Jose Fernandez, M.D., New Haven, CT          | LaDan Goble, M.D., Scottsdale, AZ                     |
| Stephen Douglas Field, D.O., Los Angeles, CA       | Neal Goldenberg, M.D., Shaker Heights, OH             |
| Zorica Filipovic-Jewell, M.D., New York, NY        | Jennifer Goldman, M.D., New York, NY                  |
| Daniel Garrett Finch, M.D., Hackensack, NJ         | Brian Patrick Gomoll, M.D., Elmwood Park, IL          |
| Karen Adams Finch, M.D., San Francisco, CA         | Benjamin Fermo Gonzalez, M.D., Richland, WA           |
| Jonathan Chase Findley, M.D., Houston, TX          | Ernesto Eleazar Gonzalez, M.D., New York, NY          |
| Carl Erik Fisher, M.D., Brooklyn, NY               | Tina L Goodson, M.D., Fayetteville, AR                |
| Joseph Scott Fisher, M.D., Miami, FL               | Katherine Goodwin, M.D., Boston, MA                   |
| Kimberly Fitzgerald, M.D., Chicago, IL             | Julie Gorman, D.O., Chicago, IL                       |
| Nicholas Fluitt, M.D., Mandeville, LA              | Olena T. Gorsky, M.D., Long Beach, CA                 |
| Jeisson Fontecha, M.D., Brooklyn, NY               | Simona Goschin, M.D., New York, NY                    |
| Anthony Jacob Forgey, D.O., Tuba City, AZ          | Michael John Gower, M.D., Gainesville, FL             |
| Kathryn Grace Cheney Fort, M.D., New York, NY      | Krystle L. Graham, D.O., North Augusta, SC            |
| Thomas Warren Foster, M.D., Providence, RI         | Jeffrey Scott Grantham, M.D., Tulsa, OK               |
| Kristin Cynthia Francis, M.D., Salt Lake City, UT  | Laurie Beth Gray, M.D., Watertown, MA                 |
| Michael M Francis, M.D., Fishers, IN               | Amanda S Green, M.D., Boston, MA                      |
| Amber Ailisa Frank, M.D., Minneapolis, MN          | Ernesto Manuel Grenier, M.D., Miami, FL               |
| Suzanne Franki, M.D., Louisville, KY               | Patrick Casey Gresham, M.D., Livonia, MI              |
| Jacob Freedman, M.D., Newton, MA                   | Ryan Greytak, M.D., San Diego, CA                     |
| Violina Frenkel, M.D., Basking Ridge, NJ           | Karine A Grigoryants, M.D., Nesconset, NY             |
| Christopher Fraser Fritzsche, M.D., Wilmington, NC | Rhianon Michele Groom, M.D., DUBUQUE, IA              |

(Psychiatry continued)

---

|                                                          |                                                        |
|----------------------------------------------------------|--------------------------------------------------------|
| Elizabeth Carlton Grueneberger, M.D., Mount Pleasant, SC | William Tobey Horn, M.D., Burlington, VT               |
| Sharon Deanna Grundland, M.D., Brooklyn, NY              | Russell Howard Horwitz, M.D., Ph.D., Potomac, MD       |
| Carissa Bauer Gunderson, M.D., Madison, WI               | Amy Hostetter, M.D., Atlanta, GA                       |
| Aarti Gupta, M.B.B.S., New Haven, CT                     | Jacob Augustus Howe, M.D., Medford, MA                 |
| Abha Gupta, D.O., New Haven, CT                          | Alan John Hsu, M.D., New York, NY                      |
| Ashish Kumar Gupta, M.B.B.S., Dedham, MA                 | David Hsu, M.D., Charlestown, MA                       |
| Neha Vashna Gupta, M.D., Royal Oak, MI                   | Victoria Huang, M.D., Encino, CA                       |
| Swapnil Gupta, M.B.B.S., New Haven, CT                   | Xianchun Huang, M.D., Bronx, NY                        |
| Deborah Lynn Guris, M.D., Homewood, IL                   | Charles Scott Huffman, M.D., Long Beach, CA            |
| Samson Gurmu, M.D., Marlton, NJ                          | Karen Hughes, D.O., Houston, TX                        |
| Alisa Rebekah Gutman, M.D., PhD, Philadelphia, PA        | Julie Ann Hugo, M.D., Pittsburgh, PA                   |
| Perihan Esra Guvenek Cokol, M.D., Brookline, MA          | Katherine Rose Hulbert, M.D., Palos Verdes Estates, CA |
| Paola Habib, M.D., Montreal, QC                          | Kirsten L. Hull, M.D., Providence, RI                  |
| Daniel Hackman, M.D., Cleveland Heights, OH              | Brian Hurley, M.D., New York, NY                       |
| Michael P Hackman, M.D., Huntington, WV                  | Ekaterina Theresa Hurst, M.D., Hopkinton, NH           |
| Danella Marie Hafeman, M.D., Pittsburgh, PA              | Saira Hussain, D.O., Glen Oaks, NY                     |
| Josiah D. Hagen, D.O., Los Angeles, CA                   | Jill Marie Husson Martinez, M.D., Scarsdale, NY        |
| Julia Ann Hajibrahim, M.D., Louisville, KY               | Steven Edward Hutchens, M.D., Crozet, VA               |
| Monica Halappanavar, M.B.B.S., Louisville, KY            | Michael Hwang, M.D., Orange, CA                        |
| Julie Hall, M.D., Los Angeles, CA                        | Nora Marie Hymowitz, M.D., New York, NY                |
| Mark Edward Haller, D.O., Hampstead, NC                  | Khadija Mani Ibeh, M.D., Edison, NJ                    |
| Amy R. Halt, M.D., Ph.D., Providence, RI                 | Ahmed Abdallah Ibrahim, M.B.Ch.B., Chattanooga, TN     |
| Kimberly Ann Hamilton, D.O., Sherwood, AR                | Blessing Obiageli Igboeli, M.D., Shaker Heights, OH    |
| Richard Spotswood Hamilton, D.O., Jacksonville, FL       | Wilson Igbrude, M.D., Eau Claire, WI                   |
| Asra Fatima Hamzavi, D.O., Bloomfield Hills, MI          | Evelia Iglesias, M.D., Miami Lakes, FL                 |
| Roxanna Handley-Namavar, M.D., New York, NY              | Roya Ijadi-Maghsoodi, M.D., Los Angeles, CA            |
| Rebecca Catherine Hanna, M.D., Dallas, TX                | Ijeoma Olachi Ijeaku, M.D., Beaumont, CA               |
| Meredith Hannan, M.D., PhD, Los Angeles, CA              | Dawn Flosnik Ionescu, M.D., Boston, MA                 |
| Aazaz Ul Haq, M.D., Los Angeles, CA                      | Elie Isenberg Grzeda, M.D., New York, NY               |
| Mark Harashevsky, D.O., Sunland, CA                      | Mihaela Ivan, M.D., Houston, TX                        |
| Jennifer Hardwick, M.D., Springfield, IL                 | Chika Uchechukwu Iwueke, M.D., Memphis, TN             |
| Sarah Hardy, D.O., Arlington, TX                         | Ifeanyi Izediuno, M.D., Rolla, MO                      |
| Alexander Harris, M.D., Ph.D., Flushing, NY              | Vincent Amaechi Izediuno, M.D., North Royalton, OH     |
| Kirk Andrew Harris Jr., M.D., Chicago, IL                | Philip Izzo, M.D., Philadelphia, PA                    |
| Thomas Eugene Hartwig, M.D., Ann Arbor, MI               | Reena Jacob, M.D., Lubbock, TX                         |
| Tracy Anne Haselow, M.D., Jacksonville, AR               | Rabia Jafri, M.D., Poquoson, VA                        |
| Tamara Zeudi Haynes, M.D., PhD, Atlanta, GA              | Gaurav Jain, M.D., Amherst, NY                         |
| Jessica Benesch Hazen, D.O., Orange, CA                  | Subodh Jain, M. D., Springfield, IL                    |
| Kevin Floyd Heacock, M.D., Fort Dix, NJ                  | Vrashali Jain, M.B.B.S., Bay Village, OH               |
| Sean Philip Heffernan, M.D., Boston, MA                  | Reena Jaiswal, M.D., Stony Brook, NY                   |
| Belal Hegazy, M.D., Portage, MI                          | Vijaya Lakshmi Jaleel, M.D., Antioch, TN               |
| Ryan Michael Helm, M.D., Little Rock, AR                 | JaHannah Harper Jamelarin, M.D., Grove City, OH        |
| Stacey Restrepo Helps, DO, Virginia Beach, VA            | Molly Bowen James-Myers, M.D., San Francisco, CA       |
| Meghann Hennelly, M.D., New York, NY                     | Jena Bowman Jamison, M.D., Washington, DC              |
| Benjamin Jay Herbstman, M.D., Belmont, MA                | Julie Overboe Jarvis, D.O., Minneapolis, MN            |
| Celeste Eileen Herleth, M.D., Saint Louis, MO            | Caaithiry Jayaraman, M.D., Norco, CA                   |
| Keith Anthony Hermanstyne, M.D., Los Angeles, CA         | Weerasinghege B.S. Jayasekara, M.B.B.S., Hewlett, NY   |
| Sara Blythe Heron, M.D., San Francisco, CA               | Shamala Jeevarakshagan, M.D., Saint Paul, MN           |
| William Hervey, M.D., Palm Harbor, FL                    | Hussam Aldeen Jefee Bahloul, M.D., New Haven, CT       |
| Stephanie Leigh Hill, M.D., Providence, RI               | Jessica Jeffrey, D.O., Salem, VA                       |
| Soniya Hirachan, M.D., Pittsburgh, PA                    | Jessica Jeffrey, M.D., Los Angeles, CA                 |
| Hwa Soo Hoang, M.D., Tenafly, NJ                         | Robert A Jenkins, M.D., Ardmore, PA                    |
| Daniel Michael Hochman, M.D., Austin, TX                 | Sofia Kaipaeaea Jensen, M.D., Philadelphia, PA         |
| Michael Everett Hoefler, M.D., New Haven, CT             | Anupam Jha, M.D., Sandusky, OH                         |
| Barry Joseph Hoffman, M.D., Berwyn, PA                   | Li Jin, D.O., Plano, TX                                |
| Rebecca Hopkinson, M.D., Seattle, WA                     | Kristina R Jiner, M.D., Blacklick, OH                  |

---

(Psychiatry continued)

|                                                      |                                                          |
|------------------------------------------------------|----------------------------------------------------------|
| Brian Humphrey Johns, M.D., Minneapolis, MN          | Jacquelyn Renae Kimball, M.D., Southwick, MA             |
| Abby Joy Johnson, D.O., Grosse Pointe Farms, MI      | Eitan Kimchi, M.D., Baltimore, MD                        |
| Rania Miriam Johnson, M.D., Chicago, IL              | Laura Kimeldorf, M.D., New York, NY                      |
| Sylvia Budd Johnson, M.D., Round Rock, TX            | Eugene Kimn, M.D., Los Angeles, CA                       |
| Olivia M. Joly, M.D., New York, NY                   | William Clint Kindrick, M.D., Fort Smith, AR             |
| Natalie Danielle Jordan, M.D., Eagan, MN             | Angela SY King, M.D., Honolulu, HI                       |
| Louis Theodore Joseph, M.D., Westland, MI            | Olga Kissel, M.D., Berwyn, PA                            |
| Merima-Misirca Jurici, M.D., New Bedford, MA         | Kavitha Kittu, M.D., Manchester, NH                      |
| Michelle Lynn Kachman, M.D., Battle Creek, MI        | David Lee Klein, M.D., Atlanta, GA                       |
| Sharon Marie Kahler, M.D., New York, NY              | Carli Pam Klinghoffer, M.D., New York, NY                |
| Ruby Kahlon, M.D., El Sobrante, CA                   | Matthew Knisley, M.D., Clearwater, FL                    |
| Arun N Reddy Kaithi, M.D., Louisville, KY            | Jennifer Lynn Koch, M.D., Lexington, MA                  |
| Vicki Kalira, M.D., New York, NY                     | Rebekah Wright Koch, M.D., Lufkin, TX                    |
| Robert P. Kallinicos, M.D., De Witt, NY              | Narayana Murty Koduri, M.B.B.S., North Platte, NE        |
| Inder Darshan Kaur Kalra, M.B.B.S., Phoenixville, PA | Stephanie Lynn Kohler-Neuwirth, M.D., Milwaukee, WI      |
| Surendra Kandel, M.D., Rockville, MD                 | Brandon Alan Kohrt, M.D., Ph.D., Washington, DC          |
| Neha Kansara, M.D., M.B.B.S., Metairie, LA           | Pradip Koirala, M.D., Clifton Forge, VA                  |
| Jyoti Kanwar, M.D., Ellicott City, MD                | Moya Kombrinck, M.D., Pittsboro, NC                      |
| Andrew Peter Kaplan, D.O., Scarborough, ME           | Cathy A Kondas, M.D., New York, NY                       |
| Daniel Karlin, M.D., Boston, MA                      | Melanie Elizabeth Kopp, M.D., Brooklyn, NY               |
| Martha Arwen Karlstad, M.D., Viroqua, WI             | Panagiota Korenis, M.D., Eastchester, NY                 |
| Sophia Kassem, D.O., New Albany, OH                  | Caleb Korngold, M.D., San Francisco, CA                  |
| Archana Kathpal, M.D., Liverpool, NY                 | Arkady Korotinsky, M.D., Baltimore, MD                   |
| Aaron J. Kauer, M.D., Iowa City, IA                  | John Michael Korpics, M.D., Chicago, IL                  |
| Jagdeep Kaur, M.D., Baltimore, MD                    | Donald J. Kosatka, M.D., Tripler Army Medical Center, HI |
| Matthew Stern Kayser, M.D., PhD, Philadelphia, PA    | Sussann Grace Kotara, M.D., Austin, TX                   |
| Christopher John Keary, M.D., Boston, MA             | Nina Vanessa Kraguljac, M.D., Birmingham, AL             |
| Sarah Jane Keiser, M.D., Wisconsin Rapids, WI        | Stuart Herr Krein, M.D., Maryville, MO                   |
| Anne Christine Kelly, M.D., Durham, NC               | Sylvia Krinsky, M.D., Cambridge, MA                      |
| Belinda Lee Kelly, M.D., Shaker Heights, OH          | David Kroll, M.D., Cambridge, MA                         |
| Jusleen Kendhari, M.D., Louisville, KY               | Jennifer Kruse, M.D., Rochester, MN                      |
| Ernest Jeremy Kendrick, M.D., Sandy, UT              | Stephanie Kua, M.D., Buena Park, CA                      |
| Laura Elizabeth Kenkel, M.D., Sacramento, CA         | Nikolaus Sebastian Kubista, D.O., San Antonio, TX        |
| Nancy Allison Kerner, M.D., Briarwood, NY            | Sanaz Kumar, M.D., Rockville, MD                         |
| Suzanne Kerns, M.B.B.S., Folly Beach, SC             | Tarun Kumar, M.D., Liverpool, NY                         |
| Marianna Isabel Kessimian, M.D., Cranston, RI        | Kevin Anthony Kunzer, M.D., Portage, MI                  |
| Katherine Ann Kessler, M.D., Boston, MA              | Sophia Kuo, M.D., Portland, OR                           |
| Andrew Robert Keyes, M.D., Pasadena, CA              | Preetha Sharone Kuppuswamy, M.B.B.S., Ann Arbor, MI      |
| Mohamad Hadi Khafaja, M.D., Albuquerque, NM          | Mari Kurahashi, M.D., Brooklyn, NY                       |
| Rushaniya Khairova, M.D., Saint Louis, MO            | Danielle Kushner, M.D., New York, NY                     |
| Humaira Khalid, M.D., Monmouth Junction, NJ          | Lisa Joy Kutner, M.D., San Diego, CA                     |
| Ovais Khalid, M.D., Salisbury, MD                    | Woo-Jin Kwak, D.O., Birmingham, AL                       |
| Sahib Khalsa, M.D., Los Angeles, CA                  | Alexander Kihyuk Kwon, M.D., Cherry Hill, NJ             |
| Christina Tara Khan, M.D., Palo Alto, CA             | Beth Ann LaBardi, M.D., Chicago, IL                      |
| Ilea Khan, M.D., New Haven, CT                       | Rushiraj Chaitanya Laiwala, M.D., Johnson City, TN       |
| Mashiur Rahman Khan, M.D., Prospect, KY              | Sherrell Tong Lam, M.D., Rockville, MD                   |
| Sameer Khan, M.B.B.S., Jackson Hts, NY               | Kristy Ann Lamb, M.D., San Diego, CA                     |
| Tahir Khan, M.D., Jersey City, NJ                    | Whitney E. Landa, M.D., Austin, TX                       |
| Zishan Khan, M.D., Tampa, FL                         | Kyle Alexander Lapidus, M.D., PhD, New York, NY          |
| Gunjan Khandpur, M.D., Elm Grove, WI                 | Rachel Leah Lapidus, M.D., Campbell, CA                  |
| Manpreet Khemka, M.D., Hattiesburg, MS               | Justin James Lapollo, D.O., Ludowici, GA                 |
| Manav Khullar, M.D., Holland, MI                     | Brian Larrow, D.O., Holyoke, MA                          |
| Vininder Singh Khunkhun, M.D., Pittsburgh, PA        | Hannah Larsen, M.D., Cambridge, MA                       |
| Devin Kim, M.D., Tucson, AZ                          | Vanessa Leigh Lauzon, M.D., San Diego, CA                |
| Esther Kim, M.D., New York, NY                       | O'Nisha Shanette Lawrence, M.D., Cary, NC                |
| Tae Soon Kim, M.D., Torrance, CA                     | Sonya Lazarevic, M.D., MS, New York, NY                  |

(Psychiatry continued)

|                                                       |                                                         |
|-------------------------------------------------------|---------------------------------------------------------|
| Vandai Xuan Le, M.D., Los Angeles, CA                 | Kathryn Marie Manning, M.D., Lino Lakes, MN             |
| Clara Lee, M.D., Tucson, AZ                           | Tessa Leigh Manning, M.D., Ardmore, OK                  |
| Elliot Lee, M.D., Cincinnati, OH                      | Marc W Manseau, M.D., Brooklyn, NY                      |
| Samuel Byungsung Lee, M.D., Marina Del Rey, CA        | Kathryn M. Mansuri, M.D., Omaha, NE                     |
| Clara Joyce Lee Zimmerman, M.D., Rochester, MN        | Maksim Marchenko, M.D., Redwood City, CA                |
| Joshua Leo, M.D., Boston, MA                          | Maria Theresa Mariano, M.D., Northridge, CA             |
| Louis Michael Leone, M.D., Virginia Beach, VA         | Jesse David Markman, M.D., Seattle, WA                  |
| Dayna Jenay LePlatte-Ogini, M.D., Ann Arbor, MI       | Paola Marrero-Gonzalez, M.D., Phoenix, AZ               |
| Simon G Leul, M.D., Philadelphia, PA                  | Akeem Nassor Marsh, M.D., New York, NY                  |
| Kristina Maria Levang, M.D., Ann Arbor, MI            | Kathleen Ann Marshall, M.D., Sacramento, CA             |
| Elizabeth Jane Levey, M.D., Boston, MA                | Andrew Christopher Martin, D.O., New York, NY           |
| Katherine Mariann Groh Levine, M.D., Philadelphia, PA | Christopher R Martin, M.D., Philadelphia, PA            |
| Kiera Surelle Levine, M.D., San Francisco, CA         | Elliott Burton Martin Jr., M.D., West Roxbury, MA       |
| Chandani Lewis, M.D., Toledo, OH                      | Kara Dawn Martinez, M.D., Albuquerque, NM               |
| Diane Lynnette Lewis, M.D., Austin, TX                | Angel E. Martinez Irizarry, M.D., Ponce, PR             |
| Heather Ann Lewis, D.O., Uniontown, OH                | Constanza Beatriz Martinez Pinanez, M.D., Cleveland, OH |
| Li Li, M.D., Mountain Brook, AL                       | Sandra Ivette Martinez Rivera, M.D., Aguadilla, PR      |
| Xiaofan Li, M.D., Houston, TX                         | Carmen Sofia Martinez Villar, M.D., Atlanta, GA         |
| Ted San Liao, M.D., Fort Lee, NJ                      | Louis Senese Martone, M.D., Pittsburgh, PA              |
| Elizabeth Marie Licalzi, M.D., Nashville, TN          | Elizabeth Jo Mason, M.D., Columbia, SC                  |
| Andrew Hyun Liew, M.D., Chicago, IL                   | Sasha Massachi, M.D., Rochester, NY                     |
| Teresa Lim, M.D., Toronto, ON                         | Kenneth Harold Masters, M.D., Houston, TX               |
| Dannica Lin, M.D., Seattle, WA                        | Nickie Mathew, M.D., Maple Ridge, BC                    |
| Lino Alexander Linares, D.O., Tampa, FL               | Nivedita Mathur, M.D., Chesterbrook, PA                 |
| Omer Liran, M.D., Northridge, CA                      | Jon Richard Maust, M.D., Seymour Johnson AFB, NC        |
| Christine Maria Liszewski, M.D., East Lansing, MI     | Robert Juliusz Maydell, M.D., Chicago, IL               |
| Robin Koester Livingston, M.D., Houston, TX           | Kristin Desiree McArthur, M.D., Ann Arbor, MI           |
| Kristen Livingstone, M.D., Seattle, WA                | Anne McBride, M.D., Sacramento, CA                      |
| Simon Livingstone, M.D., Seattle, WA                  | Charles McCormick, MD, MPH, Durham, NC                  |
| Nubia Geysell Lluberres-Rincon, M.D., Morgantown, WV  | Lynn Marie McCormick, M.D., Norwich, VT                 |
| Liudmila Lobach, M.D., Philadelphia, PA               | Samar Zeidan McCutcheon, M.D., Dublin, OH               |
| Matthew Lobosco, M.D., Farmingville, NY               | Anna Kari McDowell, M.D., Seattle, WA                   |
| Muruga Anand Loganathan, M.D., Pittsburgh, PA         | Betsy Kay McGee, M.D., MPh., North Liberty, IA          |
| Royal Arthur Lomblot, D.O., FPO AE, AE                | Mark McGee, M.D., Guilford, VT                          |
| Leonardo Lopez, M.D., Glen Oaks, NY                   | Elizabeth Clare McGuire, M.D., Los Angeles, CA          |
| Liliana Lopez, M.D., Houston, TX                      | Alastair J McKean, M.D., Rochester, MN                  |
| Uzelia Josheba Louis-Jacques, M.D., Wallingford, CT   | Dylan McKenney, M.D., Portland, ME                      |
| Amy Christine Lowe, M.D., Baltimore, MD               | Curtis Alan McKnight, M.D., Phoenix, AZ                 |
| Gabriel E Lugo Rodriguez, M.D., San German, PR        | John Oliver McLain Jr., M.D., Alachua, FL               |
| Anthony Mark Lujack, M.D., New York, NY               | Bryon McQuirt, M.D., Decatur, GA                        |
| Khin Mar Lwin, M.D., Franklin Square, NY              | Amy Meadows, M.D., Lexington, KY                        |
| Matthew David Lynx, M.D., Ph.D., Dallas, TX           | Jessica Mees-Campbell, M.D., Poquoson, VA               |
| Pamela Joy Lyss-Lerman, M.D., San Francisco, CA       | Ajay Mehta, M.D., North Attleboro, MA                   |
| Sarah M. Lytle, M.D., Shaker Heights, OH              | Peter Michael Meis, M.D., Seattle, WA                   |
| Anna Mackender, M.D., Addison, IL                     | Adeel Meraj, MD, Kansas City, KS                        |
| Carlene Marie MacMillan, M.D., Waltham, MA            | Elena Metcalf, M.D., Minneapolis, MN                    |
| Jayakrishna Madabushi, M.B.B.S., Omaha, NE            | Rachel Lee Metheny, M.D., Bonita Springs, FL            |
| Zeba Madni, M.D., Carmel, IN                          | Megha Miglani, M.D., Danville, CA                       |
| John Robert Magera, M.D., Rockville, MD               | Eeva Mikkola, M.D., New York, NY                        |
| Satinder Mahal, D.O., Los Angeles, CA                 | Dale Katherine Miller, M.D., Charleston, SC             |
| Santosh Maharjan, M.D., Fort Wayne, IN                | Sobia Naz Mirza, M.D., Johnson City, NY                 |
| Huma Mahmood, D.O., Philadelphia, PA                  | Adrienne D. Mishkin, M.D., MPH, New York, NY            |
| Tina Mai, M.D., Vallejo, CA                           | Gaurav Mishra, M.D., Takoma Park, MD                    |
| Lawrence Taymour Malak, M.D., San Diego, CA           | Marcos Modiano Esquenazi, M.D., Chicago, IL             |
| Rehan Ahmad Malik, M.D., Edison, NJ                   | Brian Scott Mohlenhoff, M.D., San Francisco, CA         |
| Andrew James Manett, M.D., Mount Pleasant, SC         | Patrick Molitor, M.D., Dearing, GA                      |

(Psychiatry continued)

|                                                         |                                                    |
|---------------------------------------------------------|----------------------------------------------------|
| Anna Victoria Rotberg Molofsky, M.D., San Francisco, CA | Sorin Nica, M.D., Washington, PA                   |
| Michelle Anne Monro, D.O., Palmdale, CA                 | Scott David Nichols, M.D., Chico, CA               |
| Kathy Monroy Penuela, M.D., Miramar, FL                 | Takeshia Niday, M.D., San Diego, CA                |
| Sophia Monsour, D.O., Saratoga Springs, NY              | Rose Nikraves, D.O., Los Angeles, CA               |
| Christopher Montes, M.D., Moonachie, NJ                 | Mohammad Asim Nisar, M.D., Okeechobee, FL          |
| Andrea Moore, M.D., Portland, OR                        | Bobby Ray Nix, M.D., Houston, TX                   |
| Rubin Moore, M.D., Olathe, KS                           | Courtney Diane Nixon, M.D., Oklahoma City, OK      |
| Timothy Rogers Moore, M.D., Wakefield, MA               | Abigail Babin Nodler, M.D., Boston, MA             |
| Mahshid Moradiseresht, M.D., Franklin, TN               | Rachel Noone, M.D., Brooklyn, NY                   |
| Ana Paula Morais, M.D., West Hartford, CT               | Charles Noplis, M.D., Louisville, KY               |
| Jonathan Raymond Moran, M.D., Boston, MA                | Jeniece Marie Nott, M.D., Coralville, IA           |
| Rachel Rose Morano, M.D., Columbia, MD                  | Daniel Patrick Notzon, M.D., New York, NY          |
| Alisha Moreland, M.D., Portland, OR                     | Kimberly Nowak, D.O., Palatine, IL                 |
| Michael A. Moreno, M.D., Park Ridge, IL                 | Christhine Nuez, M.D., Sedona, AZ                  |
| Andrei G. Moroz, M.D., New York, NY                     | Jennifer Grace O'Donohoe, M.D., Salt Lake City, UT |
| Jessica Herrera Morris, M.D., Silver Spring, MD         | Siobhan Elizabeth O'Herron, M.D., Newburgh, NY     |
| Carrie Moseley, M.D., Fayetteville, AR                  | Ikenna Obasi, M.D., Plover, WI                     |
| Andrea Mow, D.O., Helena, MT                            | Demian Forest Obregon, M.D., Tampa, FL             |
| Megan Marie Mroczkowski, M.D., New York, NY             | Tyler S Oesterle, M.D., Rochester, MN              |
| Asma Mudassir, M.D., Norman, OK                         | Kelin Mezzomo Ogburn, M.D., San Antonio, TX        |
| Heath Mueller, M.D., Tulsa, OK                          | Esther Eunae Oh, M.D., Cerritos, CA                |
| Berjees Mukhtar, M.D., Middletown, DE                   | Sadiat Kristina Olatunbosun, M.D., Dickinson, TX   |
| Venkata Marthanda Sastry Mukkavilli, M.D., Ashburn, VA  | Mark Alan Oldham, M.D., New Haven, CT              |
| Dhipthi Mulligan, M.D., Durham, NC                      | Nekesha Oliphant, M.D., Big Spring, TX             |
| Richard Mullin, M.D., Morgantown, WV                    | Kristine Urban Olivier Dr., M.D., Lafayette, LA    |
| Melissa Muniz, M.D., Pittsburgh, PA                     | Jacob OMeilia, M.D., Fort Worth, TX                |
| Emily Murphy, M.D., Pawtucket, RI                       | Sandra Onyeagoro, M.D., Winston Salem, NC          |
| Erin Elizabeth Murphy, M.D., Los Angeles, CA            | Lauren Melanie Osborne, M.D., Baltimore, MD        |
| Shruti Pradeep Mutalik, MBBS, Woodside, NY              | Kenan Osmanovic, M.D., Somerset, NJ                |
| Jyotsna Muttineni, M.D., League City, TX                | Christine Osterhout, M.D., Roseville, CA           |
| Myo Thwin Myint, M.D., Mandeville, LA                   | Yasmin Nadia Owusu, M.D., Redwood City, CA         |
| Ruchi Nadella, M.D., Edgewater, NJ                      | Kristine Marie Packo, M.D., Akron, OH              |
| Nivedita Nadkarni, M.D., Charlottesville, VA            | Cayce Schnare Paddock, M.D., Homewood, AL          |
| Iquo Olubukola Nafiu, M.D., Saline, MI                  | Angel G. Pag n Torres, M.D., San Juan, PR          |
| Herman Aronov Naftel, M.D., Chapel Hill, NC             | Jessica Ann Pagano, M.D., Irvine, CA               |
| Alana E. Nagle, M.D., Somerville, MA                    | Eun Sun Paik, M.D., Waukesha, WI                   |
| Andrei Yevgenyevich Nagorny, M.D., Valhalla, NY         | Bahram Panbehi, M.D., Alexandria, VA               |
| Ravi Nahata, M.D., Little Rock, AR                      | Hillary Pane, M.D., Tulsa, OK                      |
| Meredith Zoe Naidorf, M.D., New York, NY                | Stephen Philip Panyko, M.D., Durham, NC            |
| Elizabeth Nakamura, M.D., Encino, CA                    | John Panzone, D.O., Flushing, NY                   |
| Ki Won Nam, M.D., Iowa City, IA                         | Andrea Papa-Molter, D.O., Cherry Hill, NJ          |
| Praveen Narahari, M.D., Daphne, AL                      | Anushree Parashar, M.D., Philadelphia, PA          |
| Louis Joseph Nardelli, M.D., Stephenson, VA             | Yung Ah Park, M.D., New Haven, CT                  |
| Indrani Naskar, M.D., Hilliard, OH                      | Amol Patel, M.D., Scottsdale, AZ                   |
| Armin K. Nassiri, M.D., Ann Arbor, MI                   | Gaurav Hiren Patel, M.D., New York, NY             |
| Robert Nastasi, M.D., Fayetteville, NY                  | Nimisha Patel, M.D., Burr Ridge, IL                |
| Ksenia Nawrocki, M.D., San Diego, CA                    | Sanjay Hiroo Patel, M.D., Brooklyn, NY             |
| Michelle Odette Nazario-Malave, M.D., Houston, TX       | Prem Nath Pathak, M.D., Bismarck, ND               |
| Hani Nazha, M.D., Charleston, WV                        | Viranga Pathiraja, M.D., Charlotte, NC             |
| Tara Irene Neeley, M.D., San Antonio, TX                | Aaron Ronald Patterson, M.D., New York, NY         |
| Andrea Nelsen, M.D., Brainerd, MN                       | David Balis Patton, M.D., Durham, NC               |
| Amit Neog, MD, Wilkes Barre, PA                         | Cynthia Paul, M.D., Omaha, NE                      |
| Jennifer Mariko Neuwalder, M.D., Somerville, MA         | Joshua R Paul, M.D., Joshua Paul, CA               |
| Brianna Arrington Newhouse, M.D., Farmington, MI        | Panchajanya Paul, M.D., Atlanta, GA                |
| Mark Wilson Newman, M.D., Chicago, IL                   | Thomas John Pavey, M.D., Saint Paul, MN            |
| Albert Q Nguyen, D.O., Chicago, IL                      | Juan D Pedraza, M.D., New York, NY                 |



(Psychiatry continued)

|                                                       |                                                     |
|-------------------------------------------------------|-----------------------------------------------------|
| Scott Robert Pekrul, M.D., Ypsilanti, MI              | Diana Ratki, D.O., White Plains, NY                 |
| Ashley Penn, M.D., San Diego, CA                      | Simha Esther Ravven, M.D., Putney, VT               |
| Nissa Marie Perez, M.D., Tarzana, CA                  | Blake Jonathan Rawdin, M.D., San Francisco, CA      |
| Tara Renee Perkins, D.O., Delaware, OH                | Nathaniel Leon Ray, M.D., Milwaukee, WI             |
| Angeliki Pesiridou, M.D., Philadelphia, PA            | Abner Oliver Rayapati, M.D., Lexington, KY          |
| Brian Ngoc Bao Pham, M.D., Orange, CA                 | Venkata R. A. Rebbapragada, M.D., Houston, TX       |
| Douglas Hung Phan, M.D., Anaheim, CA                  | Anne E Redburn, D.O., San Diego, CA                 |
| Mark Christian Phelps, M.D., Shorewood, WI            | Ashwin Mamidi Reddy, M.D., Boston, MA               |
| Maggie Rose Eisenhower Pierson, M.D., Charleston, SC  | Geetha Reddy, M.D., San Francisco, CA               |
| James Henry Piktel, M.D., Seattle, WA                 | Sparsha Shivram Reddy, M.D., Cambridge, MA          |
| Nathan Pilgrim, D.O., M.P.H., Alexandria, VA          | Karin Anne Reed, M.D., Hartford, VT                 |
| Santosh Kumar Pillai, D.O., Orlando, FL               | Christina Vaniersel Reeder, M.D., Oklahoma City, OK |
| Sofia Pineda Ochoa, M.D., Sugar Land, TX              | Ahmed M. Refat Abdelaziz, M.D., Oklahoma City, OK   |
| Wade Harley Pinson III, M.D., Texas City, TX          | Karen Reimers, MD, Eau Claire, WI                   |
| Peter Thomas Pinto, M.D., Las Vegas, NV               | Wendy Lee Reiser, M.D., Cambridge, MA               |
| Zachary Aaron Plaut, M.D., San Francisco, CA          | Jeffrey Alfred Reynante, M.D., Cohoes, NY           |
| Gayle Pletsch, M.D., New Orleans, LA                  | Annette Reynolds, M.D., Lexington, KY               |
| Rachel Plum, M.D., Traverse City, MI                  | Mary M. Rhodes, M.D., Norfolk, VA                   |
| Marina Polur, M.D., Orlando, FL                       | Jose Ribas Roca, M.D., Boston, MA                   |
| Rachel Lauren Pope, M.D., Owens Cross Roads, AL       | Luciana Ribeiro, M.D., Ph.D., Chicago, IL           |
| Gregory Jonathan Postal, M.D., Bay Harbor Islands, FL | Karen Marie Rice, M.D., Bronx, NY                   |
| Julie Poulin, M.D., South Chittenden, VT              | Sarah Beth Riehl, M.D., Royal Oak, MI               |
| Tiona Guess Praylow, M.D., Columbia, SC               | Briana Marie Riemer, M.D., Baltimore, MD            |
| Matthew Michael Preston, M.D., Peoria, IL             | Sandra Esther Rivera Gonzalez, M.D., San Juan, PR   |
| Taylor Crawford Preston, M.D., Birmingham, AL         | Hector Luis Rivera Reyes, M.D., San Juan, PR        |
| Brie Anne Pulas, M.D., Tampa, FL                      | Aiyana Rivera-Rodriguez, M.D., Bayside, NY          |
| Sapna Purawat, M.D., Grand Island, NE                 | Gwendolyn E Roberson, M.D., West Valley City, UT    |
| Kristina Marina Purganan, D.O., Cincinnati, OH        | Lee Adam Robinson, M.D., Somerville, MA             |
| Neil Vishal Puri, M.D., Vienna, VA                    | Christopher Rodgman, M.D., New Orleans, LA          |
| Sharath Puttichanda, M.B.B.S., Providence, RI         | Darice Melisse Rodriguez, M.D., Houston, TX         |
| Ivan Kiryluk Putziger, M.D., Rancho Cucamonga, CA     | Jason William Rodriguez, M.D., Denver, CO           |
| Nicole Marie Quiterio, M.D., Menlo Park, CA           | Rudy Rodriguez, M.D., San Diego, CA                 |
| Raymond Raad, M.D., New York, NY                      | Karla Michelle Rodriguez Perez, M.D., Worcester, MA |
| Christopher W Racine, M.D., Brooklyn, NY              | Maria Pia Rogines Velo, M.D., West Newton, MA       |
| Albena Radoslavova, M.D., Southaven, MS               | Luzangela Rojas- Mogollon, M.D., Exeter, NH         |
| Olga Alexandrovna Rafaelian, M.D., Baltimore, MD      | Elizabeth Sewell Rollins, M.D., Asheville, NC       |
| Cesar-Michael Rafano, M.D., Loma Linda, CA            | Jan Carlos Roman Ithier, M.D., San Juan, PR         |
| Md.Mushfiqur Rahman, M.D., Wilkes Barre, PA           | Paul Edward Romo, M.D., Albuquerque, NM             |
| Mariam Rahmani, M.D., Gainesville, FL                 | Melissa H Rooney, M.D., New York, NY                |
| Pushpa Raja, M.D., Los Angeles, CA                    | Dana Ioana Rosca, M.D., San Francisco, CA           |
| Deepak Rajpoot, M.D., Lenexa, KS                      | Rachel Helene Rose, M.D., Hilo, HI                  |
| Maryam Rakhmatullina, M.D., West Nyack, NY            | Anna Halperin Rosen, M.D., New York, NY             |
| Laurel Ralston, D.O., Cleveland, OH                   | Amanda Thompson Roten, M.D., Charleston, SC         |
| Seethalakshmi Ramanathan, M.B.B.S., Jamesville, NY    | James E Roth, M.D., Rochester, MN                   |
| Christie Rambow, M.D., Weeki Wachee, FL               | Michelanne Rothrock, M.D., New Haven, CT            |
| Melissa Anne Ramirez, M.D., Scottsdale, AZ            | Faith Renee Rowland, M.D., Upper Marlboro, MD       |
| Rachel Ramirez, M.D., New Haven, CT                   | Matthew Lucas Ruggieri, M.D., Snyder, NY            |
| Ricardo Ramirez, M.D., Monterey Park, CA              | Clara Ruiz, M.D., Portland, OR                      |
| Lysette E. Ramos, M.D., Reading, PA                   | Steven J Runyan, D.O., Burlington, VT               |
| Pamela Ramos, M.D., Baltimore, MD                     | Stephen James Rush, M.D., Fort Wayne, IN            |
| Andres A. Ramos Henriquez, M.D., West Hartford, CT    | Elsa Russom, M.D., Staten Island, NY                |
| Maria de los Angeles Ramos-Garcia, M.D., Parlin, NJ   | Iustinian Rusu, M.D., Rochester, NY                 |
| Sonal Hamendra Rana, M.D., Diamond Bar, CA            | Molly Ryan, D.O., Davie, FL                         |
| Frank Randall, M.D., Colton, CA                       | Abdolreza Saadabadi, M.D., Bakersfield, CA          |
| Sukumar Tenneti Rao, M.D., Brooklyn, NY               | Diana Patricia Sabagh Sabagh, M.D., Waterbury, CT   |
| James C Rapley III, M.D., Norfolk, VA                 | Adharsh Pravid Sahadevan, M.D., Scranton, PA        |

(Psychiatry continued)

Ryan A Salahi, M.D., Palm City, FL  
Muskinni Salau, M.D., Columbia, MO  
Carlos Salgado, M.D., New Haven, CT  
Zeina Saliba, M.D., McLean, VA  
Clint Harold Salo, D.O., Placentia, CA  
Emma Carin Samelson-Jones, M.D., San Francisco, CA  
Chase Baldwin Samsel, M.D., Pawtucket, RI  
Diana Samuel, M.D., New York, NY  
Erin Kea Samuels, M.D., New York, NY  
Andre Sanchez, M.D., Miami, FL  
Sohag Natvarlal Sanghani, M.B.B.S., Glen Oaks, NY  
Javier Santos Cubix, M.D., Bronx, NY  
Lorenzo Miguel Santos Gutierrez, M.D., New York, NY  
Jason Haines Sapp, D.O., Denver, CO  
Vidushi Savant, M.D., Palo Alto, CA  
Victor Sawhney, M.D., New City, NY  
Alexandra Helling Sawicki, M.D., Atlanta, GA  
Nadia Helling Sawicki, M.D., Atlanta, GA  
Jonathan Scarff, M.D., Spartanburg, SC  
Kelly Scheinberg, M.D., Atlanta, GA  
Marissa Ann Schiel, M.D., Highlands Ranch, CO  
Craig A Schiltz, M.D., San Francisco, CA  
Kelly Schofield, M.D., Chapel Hill, NC  
Sarah Morgan Schrauben, M.D., Portland, OR  
Miriam Louise Schroeder, M.D., Saint Louis, MO  
Shannon Christine Schuerger, M.D., Rockville, MD  
Joseph Daniel Schuermeyer, M.D., Denver, CO  
Lauren Heather Schwartz, M.D., Oklahoma City, OK  
Monifa Shamis Seawell, M.D., Atlanta, GA  
Erin Beth Seery, M.D., Charleston, SC  
Jennifer Smith Segura, M.D., Durham, NC  
Gundeep Sekhon, M.D., Elk Grove, CA  
Amanda Marie Sells, D.O., Mission Hills, KS  
Torang Shatzmiller Sepah, M.D., Pasadena, CA  
Joe Anthony Sepulveda, M.D., San Diego, CA  
Arash Shadfar, M.D., Hamilton, NJ  
Amee K Shah, M.D., New York, NY  
Manan Shah, M.D., Charlottesville, VA  
Nisha Narayan Shah, M.D., Atlanta, GA  
Shaneel Shailesh Shah, M.B.B.S., Lyndhurst, NJ  
Vaishali Piyush Shah, M.D., Rolla, MO  
Lokesh Ramesh Shahani, M.D., MPH, Houston, TX  
Tarik Shaheen, M.D., Charlottesville, VA  
Marina Shainsky, M.D., Philadelphia, PA  
Wael Shamseddeen, M.D., Farmington Hills, MI  
Samuel Shapiro, M.D., Bronx, NY  
Pooja Sharma, M.D., Ballwin, MO  
Taralkumar Ravjibhai Sharma, M.D., Anderson, SC  
Valerie Crane Sharpe, M.D., Springfield, MA  
Bryan Ingram Shaw, M.D., Las Vegas, NV  
Sara Kathleen Sheriff, M.D., Oakland, CA  
Chelsea Shih, M.D., Seattle, WA  
Daniel N Shippy, M.D., Virginia Beach, VA  
Jennifer C Shippy, M.D., Portsmouth, VA  
Margaret Lenora Shirley, M.D., San Francisco, CA  
Madhuri Kasat Shors, M.D., Minneapolis, MN

Elizabeth Shultz, D.O., Franklin, TN  
Mardoche Sidor, M.D., Camillus, NY  
Jessica Mae Silberlicht, M.D., New York, NY  
Jeannine Silberman, M.D., Tallahassee, FL  
Iouri Simonenko, M.D., Kansas City, MO  
Eugene Foris Simopoulos, M.D., Staunton, VA  
Pedro Benjamin Simpson, M.D., Albuquerque, NM  
Scott Alan Simpson, M.D., Denver, CO  
Jeffrey Russell Sindt, M.D., Salt Lake City, UT  
Kavya Singareddy, M.D., Salem, MA  
Anoopinder Singh, M.B.B.S., Astoria, NY  
Deepan Singh, M.D., Glen Oaks, NY  
Deepraj Singh, M.D., Philadelphia, PA  
Harmit Singh, M.B.B.S., Omaha, NE  
Narendra Pratap Singh, M.D., Portage, MI  
Suraj Pal Singh, M.D., Elm Grove, WI  
Tejpal Singh, M.D., Centreville, VA  
Bibhas Singla, M.B.B.S., Kentwood, MI  
Remy Alexandra Sirken, M.D., Hartford, CT  
Philip Edward Skoretz, M.D., Loma Linda, CA  
Channing Scott Slate, M.D., University Place, WA  
Bridget Mechele Smith, M.D., Brookhaven, MS  
Monique Dase Smith, M.D., North Pole, AK  
Rebecca Marie Smith, M.D., Brighton, MI  
Shaun E Smith, M.D., West Grove, PA  
Tim Smith, M.D., North Branch, MN  
Christopher Edward Snowdy, M.D., Burbank, CA  
Carlyn Snyder, M.D., New York, NY  
Shahe Viken Soghomonian, MD, Los Angeles, CA  
Jennifer Beth Sokol, D.O., Blue Bell, PA  
Laili Soleimani, M.D., New York, NY  
Julio K Soler-Villanueva, M.D., Aguadilla, PR  
Arya Soman, M.D., Brookline, MA  
Margarita Ivanovna Somova, M.D., Redwood City, CA  
Kristina S. Sogar, M.D., Albuquerque, NM  
Amanda Square, M.D., New Haven, CT  
Kishore Kumar Sriram, M.D., Fort Wayne, IN  
Jessica Stack, M.D., New York, NY  
Michael Sean Stanley, M.D., Portland, OR  
Victoria Anne Stanton, M.D., Mountain View, CA  
Steven Starks, M.D., Cypress, TX  
Milos Starovic, M.D., New York, NY  
Christopher Starr, M.D., Portland, OR  
Ian Richard Starr, M.D., Portland, OR  
Kathryn Starr, M.D., Portland, OR  
Marnie Mireya Stefan Acta, M.D., Gainesville, FL  
Kimberly Bentley Steiner, M.D., Whitefish Bay, WI  
Meghan Magley Steinour, M.D., woodland, CA  
Evelyn Stephens, M.D., New York, NY  
Christopher Allen Stetler, M.D., Port Orchard, WA  
Sarah Diamond Steuerman, M.D., Chicago, IL  
Rene Jovanie Stokes, M.D., MPH, Baltimore, MD  
Laura Allison Stone, M.D., Irving, TX  
Caitlin Elizabeth Stork, M.D., New York, NY  
Griffin Alexander Stout, M.D., Columbus, OH  
Tyler E Stratton, M.D., Fort Belvoir, VA

(Psychiatry continued)

|                                                        |                                                       |
|--------------------------------------------------------|-------------------------------------------------------|
| Teo-Carlo Straun, M.D., New Haven, CT                  | Yakir Konstantin Vaks, M.D., Bel Air, MD              |
| Joan Striebel, M.D., Los Angeles, CA                   | Erica Valdez, M.D., Pinehurst, NC                     |
| Kasey Jean Strosahl, D.O., Ames, IA                    | Lisa Valentine, M.D., Houston, TX                     |
| Roohi Bano Sualeh, M.B.B.S., Granger, IN               | Adrian Valle, M.D., Tucson, AZ                        |
| Bishnu Prasad Subedi, M.D., Farmington, MO             | Jennifer Lee Vande Voort, M.D., Rochester, MN         |
| Vinod Pachagiri Suresh, M.D., Tenafly, NJ              | Michelle K. Vanden Noven, M.D., Shorewood, WI         |
| Aita Kai Susi, M.D., Havertown, PA                     | Erik Rudolph Vanderlip, M.D., Tulsa, OK               |
| Joan Suszko, M.D., Houston, TX                         | Liju Varghese, M.B.B.S., High Point, NC               |
| Cynthia Anne Swartz, M.D., Wilder, VT                  | Gregory Mark Varhely, M.D., Georgetown, TX            |
| April Louise Sweeney, M.D., Portland, OR               | Kavara S Vaughn, M.D., Morgantown, WV                 |
| Alison Swigart, M.D., Pawtucket, RI                    | Marco Antonio Vega, M.D., Harlingen, TX               |
| Chad Michael Sylvester, M.D., Saint Louis, MO          | Milka Vega P,rez, M.D., Yauco, PR                     |
| Steven Szabo, M.D., Ph.D., Silver Springs, FL          | Melanie M. Venable, M.D., Chicago, IL                 |
| Michael Huan Tang, M.D., Boston, MA                    | Amandeep Verma, M.D., Valparaiso, IN                  |
| Yekaterina Leonidovna Tatarchuk, M.D., Wallingford, PA | Shikha Verma, M.D., Gurnee, IL                        |
| Marianne W Tateosian, D.O., Mineola, NY                | Oriana Paola Vesga Lopez, M.D., Boston, MA            |
| Nelson Prakash Tauro, M.D., Crestview Hills, KY        | Bakari Vickerson, M.D., Atlanta, GA                   |
| AnDrea Danielle Taylor, M.D., Hillsborough, NC         | John Edward Vickman, M.D., Apo, AP                    |
| John B. Taylor, M.D., Boston, MA                       | Gina Smith Victor, M.D., Washington, DC               |
| Emily Tejani, M.D., New Haven, CT                      | Sami Victor, M.D., Scottsdale, AZ                     |
| Nabyl Tejani, M.D., New Haven, CT                      | Carolina Vidal, M.D., Baltimore, MD                   |
| Jonathan B. Terry, D.O., Parlier, CA                   | Karla Aitme Viera-Negron, M.D., Juncos, PR            |
| Polina Teslyar, M.D., Newton, MA                       | Marina Ghayathrie Vijayakanthan, M.D., Winchester, MA |
| Devendra Singh Thakur, M.D., Lebanon, NH               | Michael Anthony Villania, M.D., Richmond, VA          |
| Grace Thammasuvimol, M.D., Elkridge, MD                | Lyndon Villasenor, D.O., Shorewood, IL                |
| Michael Thao, M.D., Fresno, CA                         | Donna Vishnevetsky, M.D., Denver, CO                  |
| Patrick Thomas, M.D., Los Angeles, CA                  | Julie Lynn Voelker, M.D., Sherrard, IL                |
| Reena Thomas, M.D., Clarendon Hills, IL                | John Michael Vraciu, DO, North Canton, OH             |
| Shannon Thomas, D.O., Oklahoma City, OK                | Paula Marie Wadell, M.D., Sacramento, CA              |
| Crystal Gaynelle Thomas-Rozea, M.D., Twinsburg, OH     | Ryan Colt Wagoner, M.D., Sacramento, CA               |
| Alexander Mueller Timchak, M.D., Oak Park, IL          | Laura Ann Wakil, M.D., Calabasas, CA                  |
| Mandana Torabi, M.D., New York, NY                     | Katherine Walia, M.D., Manlius, NY                    |
| Jose Maria Torrijos, M.D., Brooklyn, NY                | Ashley Walker, M.D., Tulsa, OK                        |
| Nitin Toteja, M.D., Brooklyn, NY                       | Baowu Wang, M.D., Montgomery, AL                      |
| Viktoria Toth, M.D., Roslyn Heights, NY                | Jianpeng Wang, M.D., Diamond Bar, CA                  |
| Lorriann Tran, M.D., Baltimore, MD                     | Min Wang, M.D., Chicago, IL                           |
| Christian Joseph Trentacosta, M.D., Staten Island, NY  | Martha Craig Ward, M.D., Atlanta, GA                  |
| Jacob Treskovich, M.D., Charlottesville, VA            | Sasha Danchig Waring, M.D., Oakland, CA               |
| Lesia Malko Trickett, M.D., Baltimore, MD              | Tamer Wassef, M.B.B.S., South River, NJ               |
| Aveekshit Tripathi, M.B.B.S., Andover, KS              | Elizabeth Sarah Wassenaar, M.D., Cincinnati, OH       |
| TeeJay Grant Tripp, D.O., Gilbert, AZ                  | Garth Stephen Watkins, M.D., Sacramento, CA           |
| Celia Valentina Trotta, M.D., Edgewater, NJ            | Brendon Omar Watson, M.D., PhD, New York, NY          |
| Erica Tsai, M.D., Providence, RI                       | Charles William Watts, M.D., Salt Lake City, UT       |
| Gary Tsai, M.D., La Mesa, CA                           | Khandie Youlande Waugh, M.D., Fort Walton Beach, FL   |
| Iryna Anatolevna Tsvirko, M.D., Manchester, NH         | William Coleman Weatherby, D.O., Austin, TX           |
| John Waseem Tumeh, M.D., Uniontown, PA                 | Jadon Ray Webb, M.D., New Haven, CT                   |
| Elena V. Tuskenis, M.D., Shawano, WI                   | Jason Webb, M.D., Durham, NC                          |
| Dona Amos Tversky, M.D., Palo Alto, CA                 | Cheryl Wehler, M.D., Wichita, KS                      |
| Michael Paul Twist, D.O., Virginia Beach, VA           | Brooke Ellyce Weingarden, D.O., Orchard Lake, MI      |
| Terra Natae Tyler, M.D., Louisville, KY                | Susan Weinstein, M.D., Ardsley, NY                    |
| Nagaraj Uddhandi, M.D., Arnold, MO                     | Meredith Weiss, M.D., New York, NY                    |
| Daniel Jay Uderitz, M.D., Johns Island, SC             | John Hay Wells II, M.D., New Orleans, LA              |
| Ubong Jackson Udoyen, M.D., Bronx, NY                  | Kimberly Pirrone Wells, M.D., Portland, ME            |
| Aniqa Usmani, M.D., Moorestown, NJ                     | Nicole Cherie Welsh, M.D., Bellevue, NE               |
| Hyacinth Nwakamma Uzoma, M.D., Bowie, MD               | Allison Werner, M.D., Williamstown, MA                |
| Khatija Mohammad Vaid, M.D., Rockford, IL              | Joel Ira Wertheimer, M.D., Golden Beach, FL           |

(Psychiatry continued)

Richard Thomas Weyler, M.D., Ivyland, PA  
Luke White, M.D., Brooklyn, NY  
William Lee Whiting, D.O., Pensacola, FL  
Alik Sunil Widge, M.D., Ph.D., Charlestown, MA  
Donald Eugene Wiger II, M.D., Hermantown, MN  
Donnell Wigfall, D.O., Rancho Cucamonga, CA  
Christopher M. Wilk, M.D., Baltimore, MD  
Kerry Elise Wilkins, M.D., Northborough, MA  
Annie Noelle Williams, D.O., Lansing, MI  
Emily Van Leeuwen Williams, M.D., Marco Island, FL  
Eric Brannon Williams, M.D., Dallas, TX  
Kerry-Ann Lorraine Williams, M.D., Cambridge, MA  
Kyle Allen Williams, M.D., Boston, MA  
Michael E Williams, M.D., Biloxi, MS  
Philip Williams, M.D., San Diego, CA  
Amanda Moberg Wilson, M.D., New York, NY  
Deloran Wilson, M.D., Baltimore, MD  
Thandar Aung Win, M.D., Bellerose, NY  
Katherine McHugh Winner, M.D., Dayton, OH  
Jonathan Wirjo, D.O., Las Vegas, NV  
Benjamin Wiseman, M.D., Charlottesville, VA  
Justyna Sylwia Wojas, M.D., St. Petersburg, FL  
Hiwot Woldu, M.D., New York, NY  
Sujatha Kareti Wolff, M.D., Hinsdale, IL  
Joanna Yijiang Wong, M.D., Augusta, GA  
Lok Ho Wong, M.D., Augusta, GA  
Julie Ann Wood, M.D., Newburgh, IN  
Kimberly Ann Woodyard, M.D., Richmond, VA  
Amanda Mabray Wright, M.D., Mandeville, LA  
Matthew Arnot Wright, M.D. Ph.D., New York, NY  
Michael Boyd Wright, M.D., West Monroe, LA  
Ryan James Wright, M.D., Orange, CA  
Chai Hui Wu, M.D., Fpo, AP  
Serena Wu, M.D., Emeryville, CA

Timothy Peter Wuerz, D.O., Cleveland Heights, OH  
Brent Ernest Wurfel, M.D., Tulsa, OK  
Amy Wysocki, M.D., Dubois, PA  
Yan Xuan, M.D., Philadelphia, PA  
Calvin Tseng Yang, M.D., Arcadia, CA  
Katie Que Yang, M.D., Rancho Cucamonga, CA  
Kimberly Jean Yang, M.D., Ann Arbor, MI  
Lao Por Yang, M.D., Salisbury, NC  
Renata Yang, M.D., Portland, OR  
Tou Cher Yang, M.D., Plymouth, MN  
Naveen Yarasi, M.D., Columbia, MO  
Rodney Elden Yarnal, M.D., Sacramento, CA  
Lauren Holleman Yarrow, M.D., Charleston, SC  
James Robert Yon, M.D., Jefferson, MA  
David Nathan Young, M.D., Atlanta, GA  
Lisa Young, M.D., Lemoore, CA  
Michael Alan Young, M.D., Towson, MD  
Yolana Allyson Young, M.D., Glen Oaks, NY  
Jenny Auch Yung, M.D., Jackson Heights, NY  
Kashmeer Zablan, M.D., Rochester, NY  
Adeel Zafar, M.D., Phoenix, AZ  
Erin Zahradnik, M.D., New York, NY  
Connie Lynn Zajicek, M.D., Pearland, TX  
Lazaro Victor Zayas Jr., M.D., Boston, MA  
Hanna Dominika Zembrzuska, M.D., Pooler, GA  
Maria Carolina Zerrate Parra, M.D., New York, NY  
Angelo Salvatore Zieno, D.O., Bellevue, NE  
Marina Zilpert, M.D., Staten Island, NY  
Susan Heghinian Zink, M.D., San Diego, CA  
Rachel Zinns, M.D., Monroe, NJ  
Janet L Zoch, M.D., Houston, TX  
Ashley Zucker, M.D., Upland, CA  
Faye Mohamad Zuhairy, M.D., Troy, MI
