# Supplementary material for: 2013 Annual Report of the American Board of Psychiatry and Neurology, Inc.
Source: Atypon-hosted journal article supplement (doi:10.1176/appi.ajp.2014.1710902), 2014-09-01
Supplement: 1015_ds007.pdf [file 1015_ds007.pdf]

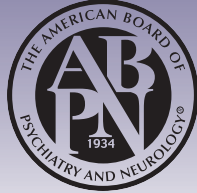

American  
Board of  
Psychiatry and  
Neurology, Inc.

A Member Board of the American Board of Medical Specialties (ABMS)

# ABPN Congratulations

Announcing diplomates of the ABPN for: **Maintenance of Certification in the specialty of Psychiatry awarded in 2013**

## MOC PSYCHIATRY (889 DIPLOMATES)

Asli Saba Abaci, M.D., Webster, NY  
Maha Mohamed Abdelkader, M.D., Ashburn, VA  
Aurif Akhtar Abedi, M.D., Ann Arbor, MI  
Michael Vincent Abene, M.D., Houston, TX  
Rachel Beth Abramson, M.D., Portland, OR  
Rebecca Joan Ackerman Raphael, M.D., Kingston, NY  
Deborah Antonia Acosta-Ramirez, M.D., Guaynabo, PR  
Lawrence Ogagaoghene Adu, M.D., Alachua, FL  
Maria Lourdes Agbing-Mamangun, M.D., Fullerton, CA  
Saghir Ahmad, M.D., Murrysville, PA  
Mohamed Safwat Ahmed, M.D., Webster, TX  
Naheed Akhtar, M.D., Madison, WI  
Sadiq H. Al-Samarrai, M.D., Columbia, MD  
Mohammed Al-Taher, M.D., Memphis, TN  
Delia Aldridge, M.D., Palatine, IL  
Jude Rajind Alexander, M.D., Rockville, MD  
Belina Rowena Alfonso, M.D., Suffolk, VA  
Diab Mfrej Almhana, M.D., Avon Lake, OH  
Denisse Marion-Landais Ambler, M.D., Pittsboro, NC  
Jonathan Christian Anderson, M.D., Staunton, VA  
Michael Alan Anderson, M.D., Wichita Falls, TX  
Norma Jean Anderson, D.O., Pipe Creek, TX  
Teodora Andrei, M.D., Mansfield Center, CT  
Reena Andrews, M.D., Easton, PA  
Jason Michael Andrus, M.D., Brooklyn, NY  
Matthew Scott Angelelli, M.D., Suffolk, VA  
Edgardo Castro Angeles, M.D., North Easton, MA  
Srilata Anne, M.D., Tuscaloosa, AL  
Mohammad Amjad Ansari, M.D., Ashburn, VA  
Tina Christina Antoine, M.D., Irvington, NY  
Alice Woodley Asby, M.D., Cambridge, MA  
Ashraf Mohamed Attalla, M.D., Atlanta, GA  
Pratap Kumar Attaluri, M.D., Peoria, IL  
Kumudini Kumari Attanagoda, M.D., Vienna, VA  
Khleber Chapman Attwell, M.D., New York, NY  
Marina Auerbach, M.D., New York, NY  
Haluk Kaya Aydin, M.D., Auckland, n/a  
William Ekow Awotwi Ayetey, M.D., Madison, WI  
Maurice Maurice Bachawati, M.D., Towson, MD

Lakshmi Prasuna Baddela, M.D., Abingdon, MD  
Margaret Ann Bahder, M.D., Gilford, NH  
Natalie Jeanne Baker-Heser, M.D., Omaha, NE  
Rajbir Singh Bakshi, M.D., Plano, TX  
Rama Balaji, M.D., Mesa, AZ  
Christos A. Ballas, M.D., Gladwyne, PA  
Duane Robert Banks, M.D., Kaysville, UT  
Michael James Barber, M.D., Houston, TX  
Inna Barg, M.D., Woodland Hills, CA  
John Carter Barker, M.D., San Francisco, CA  
Claben Rey Maypa Barraca, M.D., Panama City, FL  
Eric Jay Bartky, M.D., Livingston, NJ  
Alycia Jennifer Bartley-Heinsen, M.D., Washington, DC  
Michelle Marie Barwell, M.D., Pittsburgh, PA  
Elizabeth Ann Baxter, M.D., Nashville, TN  
Laura Baker Beard, M.D., Dallas, TX  
Gabrielle Frances Beaubrun, M.D., Lomita, CA  
Thomas Stanley Beck, M.D., Mead, WA  
Rachel Neuman Becker, M.D., New York, NY  
Sultana Begum, M.D., State College, PA  
John Thomas Beld, M.D., Appleton, WI  
Tatyana Belinsky, M.D., Cherry Hill, NJ  
Elisa Perette Bell, M.D., Chicago, IL  
Julia Ann Bell, M.D., M.P.H., Missoula, MT  
Jason Horst Bennett, M.D., La Jolla, CA  
Cynthia Lynn Benton, M.D., Austin, TX  
Nicole Joel Bergerson, M.D., Omaha, NE  
Theresa Ann Bergherr, M.D., New Haven, CT  
Stacie Berlowitz, M.D., Tampa, FL  
Lisa Robyn Berman, M.D., New York, NY  
Richard Arden Bermudes II, M.D., El Dorado Hills, CA  
Jonathan A. Bernfeld, M.D., Cincinnati, OH  
Ralph Bharati, M.D., Wichita, KS  
Renee Marie Bibeault, M.D., Kirkland, WA  
Andrew Clarke Blaine, M.D., Claremont, CA  
David John Blank, M.D., North Royalton, OH  
Brett Lee Blatter, M.D., New York, NY  
Sara Marie Bodner, M.D., South Miami, FL  
Henry Alexander Boilini, M.D., Crestview, FL

(MOC Psychiatry continued)

Isiaka Abayomi Bolarinwa, M.D., Moorestown, NJ  
Sivaji Babu Bondalapati, M.D., Ooltewah, TN  
Lisa Marie Bonvino, D.O., Smithtown, NY  
Vicky Kay Borck, D.O., Solana Beach, CA  
Jenny Lee Boyer, M.D., Muskogee, OK  
Nichole Lee Brandts, M.D., Cincinnati, OH  
Robin Christine Brannigan, M.D., Washington, DC  
Brad Alan Brazeal, M.D., Palestine, TX  
Lydia Andrea Breen, M.D., Burlingame, CA  
William A. Brennan Jr., M.D., Ph.D., Cumberland, ME  
Karen Cruz Brenneman, M.D., San Mateo, CA  
Kent Gregory Brockmann, M.D., New Richmond, WI  
Mark Christopher Brown, M.D., M.P.H., El Paso, TX  
Richard William Brown, M.D., West Chester, OH  
Sharon Daily Brown, M.D., Lauderdale Lakes, FL  
Dragana Bugarski-Kirola, M.D., Atlanta, GA  
Thu Anh Bui, M.D., Berkeley, CA  
James Thomas Bukuts, M.D., Cleveland, OH  
Can Bulucu, M.D., Lexington, MA  
James Blair Bunting Jr., M.D., Richmond, VA  
Judy Ann Burk, M.D., Bangor, ME  
Christopher Burke, M.D., Northport, NY  
Kimberly Ann Busi, M.D., New York, NY  
Shiraz Mahmud Butt, M.D., Oak Brook, IL  
Lori Viscogliosi Calabrese, M.D., South Windsor, CT  
Jun Cao, M.D., Ann Arbor, MI  
Paul Jasper Capriotti, M.D., Lisle, IL  
Gretchen Woodworth Carlson, M.D., Bellevue, WA  
Kathleen Marie Carroll, M.D., Brandon, FL  
Maria Teresa Cartagena, M.D., Amherst, NY  
Edward Francis Caruso, M.D., Stewartsville, NJ  
Jennifer Lian Casarella, M.D., Atlanta, GA  
Nicola G. Cascella, M.D., Lutherville Timonium, MD  
Jennifer Martha Casey, M.D., Dover, NH  
Mathew Valerian Castelino, M.D., Alsip, IL  
Sergio Humberto Castillo, M.D., El Paso, TX  
Vania Castillo, M.D., New York, NY  
Elizabeth McDonald Caudill, M.D., Louisville, KY  
Amal Chakraborty, M.D., Oklahoma City, OK  
Katherine Ann Chamberlain, M.D., Owosso, MI  
Valery Kaplan Chamberlin, M.D., Woodland Hills, CA  
Margaret E. Kern Champion, M.D., Chapel Hill, NC  
Marie Daniella Charles, M.D., Rockville Centre, NY  
Soumitra Chatterjee, M.D., Holtsville, NY  
Lalit Shanker Chaube, M.D., Port St Lucie, FL  
Jamil Sadiq Chaudhry, M.D., Cranston, RI  
Alexander Chen, M.D., San Francisco, CA  
Daniel Chin Chen, M.D., New Hyde Park, NY  
Frank Yi Chen, M.D., Houston, TX  
Xu Zhang Chen, M.D., Milltown, NJ  
Austina Bongnai Cho, M.D., Cerritos, CA  
Archana Chopra, M.D., Champaign, IL  
Richard Cull Christensen, M.D., Jacksonville Beach, FL  
Henry Chung, M.D., New York, NY  
John Wells Clemens, Dr, Jefferson City, MO  
Martha Ann Clevenger, M.D., Severna Park, MD

Charles Albert Cloutier, M.D., Durham, NC  
Chrissie Lackey Clure, M.D., Savannah, GA  
Steven Dee Cochran, M.D., Sioux Falls, SD  
Rebecca Safran Cohen, M.D., Sarasota, FL  
Craig Marshall Coldwell, M.D., M.P.H., Bedford, MA  
Dwight Dwayne Coleman, M.D., Shaker Heights, OH  
Diana Maria Collins, M.D., Sugar Land, TX  
Lajuana Marnita Collins, M.D., Hampton, VA  
Juan Raul Condemarin, M.D., Brighton, MA  
Alan Cook, M.D., Chapel Hill, NC  
Marc Allen Cooper, M.D., Columbia, SC  
Paula Lucile Corkey, M.D., Raleigh, NC  
Jocelyn Smith Cox, M.D., Atlanta, GA  
Gia Maria Crecelius, M.D., Los Angeles, CA  
Betsy Cregger, M.D., Menlo Park, CA  
Carolyn Elizabeth Criss, M.D., Waterville, ME  
Paul Eugene Croarkin, D.O., Rochester, MN  
David Neil Crockford, M.D., Calgary, AB  
Irene Patricia Dadson, M.D., Romulus, NY  
Salim A. Dahlvani, M.D., Glen Allen, VA  
Marc Eric Dalton, M.D., M.P.H., Washington, DC  
Nicole Danforth, M.D., Chestnut Hill, MA  
John Preston Daniels, M.D., Roseville, MN  
Barbara Elaine DaVanzo, M.D., St Simons Is, GA  
Ludmila Davidov, M.D., Rego Park, NY  
Denise Elizabeth Davis, M.D., Mequon, WI  
Gloria Thamara Davis, M.D., Providence, RI  
Jeffrey Alan Davis, M.D., Claremont, CA  
Ronda Diane Davis, M.D., Salt Lake City, UT  
Sandra Echegoyen Davis, M.D., Fort Worth, TX  
M. Zenilde A.M. de Lima, M.D., San Diego, CA  
Margaret Dwight Dean, M.D., Tacoma, WA  
Maryann Dean, M.D., San Diego, CA  
Daralynn Deardorff, D.O., Fort Worth, TX  
Richard Anthony DeBlasi, M.D., Little Silver, NJ  
Diana Del Carlo, M.D., San Marino, CA  
Oliva E. Del Pilar, M.D., Wasco, CA  
Paula Andrea Del Regno, M.D., Lancaster, NY  
Susan Eileen DeLap, M.D., Bismarck, ND  
Ivan Delgado-Ramos, M.D., Atlantic, IA  
Vladimir Demidov, M.D., Rockville, MD  
Ruchira Desai Densert, M.D., Kailua, HI  
Venugopal Depala, M.D., Temecula, CA  
Frank Robert DePietro, M.D., Pittsburgh, PA  
Michael Wayne DePriest, M.D., Las Vegas, NV  
David Conway Des Jarlais, M.D., Honolulu, HI  
Mark Wayne Diamond, D.O., Colorado Springs, CO  
Ukuku Kalu Dike, M.D., Hempstead, NY  
Gregory C. Dillon, M.D., New York, NY  
Stacey Ann DiMartino, M.D., Rochester, NY  
Dimitre Hristov Dimitrov, M.D., San Antonio, TX  
Krishna Manoj Divadeenam, M.D., Prairie Village, KS  
Ahmed M. Dokmak, M.D., Edina, MN  
Andrew William Donohue, D.O., Wilmington, DE  
Christina M. Dording, M.D., Boston, MA  
Jay Djelloul Draoua, M.D., Yorktown Heights, NY

(MOC Psychiatry continued)

|                                                             |                                                         |
|-------------------------------------------------------------|---------------------------------------------------------|
| Carolyn Marina Drazinic, M.D., Ph.D., Farmington, CT        | Leigh Anne Gaines, M.D., Cincinnati, OH                 |
| Jeffrey Alan Drexler, M.D., Knightdale, NC                  | Prashant Gajwani, M.D., Sugar Land, TX                  |
| Anthony Jack Drobnick, M.D., Saint Michaels, MD             | Redentor Lapuz Galang, M.D., Milwaukee, WI              |
| Benoit Dub,, M.D., Philadelphia, PA                         | Amelia Lucie Gallitano-Mendel, M.D., Ph.D., Phoenix, AZ |
| Yves Georges Dubois, M.D., Burlington, NJ                   | Jose Caguia Gamboa, M.D., Cerritos, CA                  |
| Bertrand Jean-Marie Duval-Arnould, M.D., Groton, CT         | Lauren Nyree Garapedian, M.D., Austin, TX               |
| Carl George Edelen, M.D., New Haven, CT                     | Robert John Gardella, M.D., Palmyra, VA                 |
| Martha Jo Edelman, M.D., Manhasset, NY                      | Sara Kathryn Gardiner, M.D., Portland, OR               |
| Judith Gallen Edersheim, M.D., Chestnut Hill, MA            | Jagdeep Singh Garewal, M.D., Bakersfield, CA            |
| Mark James Edlund, M.D., Ph.D., Twin Falls, ID              | Deborah Lynne Garrelts, M.D., Cedar Falls, IA           |
| Mary Louise Canning Edmondson, M.D., Raleigh, NC            | Medeia Emelyanovna Gartel, M.D., Chicago, IL            |
| Uzma Ehtesham, M.D., Wise, VA                               | Daniel R. Garza, M.D., Houston, TX                      |
| Michael Eis, M.D., Menomonee Falls, WI                      | Gregory Lloyd Gass, M.D., New York, NY                  |
| Tahmina R. Elahi, M.D., Copley, OH                          | Karl Adolf Gathof, M.D., Green Valley, AZ               |
| Sahar Elsayed Elezabi, M.D., MPH, Webster, NY               | Jaya Lakshmi Gavini, M.D., Edison, NJ                   |
| Bruce Allen Eliashof, M.D., Half Moon Bay, CA               | Robert Lynn Geistwhite, M.D., Portland, OR              |
| Kent Charles Eller, M.D., Phoenix, AZ                       | Jose A. Genua, M.D., Brooklyn, NY                       |
| Maxlyn Lavie Ellison, M.D., Fuquay Varina, NC               | Joseph Lucien Georges, M.D., Baldwin, NY                |
| William Paul Elsass, M.D., Breckenridge, CO                 | Evelyn Susan Gerretson, M.D., Rutland, VT               |
| Elissa Ely, M.D., Belmont, MA                               | Yakov Gertsberg, M.D., Chicago, IL                      |
| A. Willard Emch Jr., M.D., Spokane, WA                      | Junaid Muhammad Ghadai, M.D., Lincoln Park, MI          |
| Eric Edward Erickson, D.O., Spring Lake, MI                 | Muhammad Rehan Ghani, M.D., Paramus, NJ                 |
| Heidi Charlene Erickson, M.D., Boca Raton, FL               | Shareh Osman Ghani, M.D., Scottsdale, AZ                |
| David Larry Estep Jr., M.D., Auburn, AL                     | Lynn Bich-Lien Giang, M.D., San Jose, CA                |
| Booker Theodore Evans, M.D., Minot, ND                      | Sukhmani K. Gill, M.D., Gilroy, CA                      |
| Gerald Davis Evans, M.D., Mililani, HI                      | William Milton Gillespie, M.D., Ph.D., Glendora, CA     |
| Cleve Winfield Ewell III, M.D., Hampton, VA                 | Jay Adam Gingrich, M.D., Ph.D., New York, NY            |
| Ellen Fan, M.D., Plano, TX                                  | Harold Michael Ginsberg, M.D., Westport, CT             |
| Rebecca Fantauzzi, M.D., Rio Piedras, PR                    | David Thomas Golden, M.D., Auburndale, MA               |
| Kristin O. Fargher, M.D., Tampa, FL                         | Maureen R. Goldman, M.D., New York, NY                  |
| Matthew Duane Faubion, M.D., San Antonio, TX                | John-Paul Gomez, M.D., Bethlehem, PA                    |
| Larry R. Faulkner, M.D., Buffalo Grove, IL                  | Luis Alberto Gonzales, M.D., White Plains, NY           |
| Mendel Jonathan Feldsher, M.D., Patton, CA                  | Angeles Rodriquez Gonzalez, M.D., Park Ridge, IL        |
| Erinn Lynne Fellner, M.D., Sugar Hill, NH                   | Esteban Alejandro Gonzalez, M.D., McAllen, TX           |
| Laura Cristine Ferguson, M.D., Portland, OR                 | John Winston Donato Gonzalez, M.D., Terre Haute, IN     |
| Anne Carroll Fernandez, M.D., Niskayuna, NY                 | Daniel Wintner Goodman, M.D., Riverside, CT             |
| Patrizia Gabriella Ferrara Guthrie, M.D., Pacific Plsds, CA | Jesse Adam Goodman, M.D., Lenox, MA                     |
| Marina Julia Feygin, M.D., Brooklyn, NY                     | Deborah S. Garrett Gordon, M.D., Hartselle, AL          |
| Joanna Lisa Fine, M.D., M.A., New York, NY                  | Dena J. Gost, M.D., Columbus, OH                        |
| Meredith Ann Fine, M.D., Seattle, WA                        | Michael H. Gotlib, M.D., Scottsdale, AZ                 |
| Marina Fishman, M.D., Chestnut Hill, MA                     | Ashwin Gowda, M.D., Austin, TX                          |
| Adriana Marie Fitzsimmons, M.D., Howell, NJ                 | Eric Martin Grabstein, M.D., Ossining, NY               |
| Anne Maureen Fleming, M.D., Portland, OR                    | David Arthur Graeber, M.D., Albuquerque, NM             |
| Steven Mark Fogelman, M.D., Rome, NY                        | Vonda Kay Gravely, M.D., Moore, SC                      |
| David Parker Folsom, M.D., San Diego, CA                    | David Clark Gray, M.D., Jasper, IN                      |
| Candace Merita Fortune, M.D., Folsom, CA                    | Lauri Theresa Green, M.D., North Prairie, WI            |
| Bellelizabeth Foster, M.D., Albuquerque, NM                 | Larry Frederic Greenberg, M.D., Laguna Beach, CA        |
| William Rhodes Fox, M.D., King, NC                          | John Michael Greene, M.D., Los Gatos, CA                |
| Iosif Fradlis, M.D., Valley Stream, NY                      | Joseph Granville Gregory, M.D., Birmingham, AL          |
| Frederick Michael Frank, D.O., Coralville, IA               | Nichole D. Grier, M.D., Carrboro, NC                    |
| Anthony Adolph Frasca, M.D., Morganton, NC                  | Bryan Griffin, D.O., Cincinnati, OH                     |
| David Howard Friedman, M.D., Phoenix, AZ                    | Suzanne Beth Grimm, M.D., Sheboygan, WI                 |
| Mark James Friedman, M.D., Glenview, IL                     | Marilee Chantal Griswold, M.D., Blythewood, SC          |
| Julie Lynne Fudge, M.D., Rochester, NY                      | Jerzy Grzebieluch, M.D., Destin, FL                     |
| Michael Alan Fuller, M.D., Galveston, TX                    | Bret Allen Guidry, M.D., Fayetteville, NC               |
| Quentin Martin Gabor, M.D., Saint Paul, MN                  | Gemma Ganzon Guillermo, M.D., Redwood City, CA          |

(MOC Psychiatry continued)

|                                                    |                                                        |
|----------------------------------------------------|--------------------------------------------------------|
| Handan Gunduz-Bruce, M.D., Woodbridge, CT          | Julia Katherine Hyland, M.D., Carmel, IN               |
| Anurag Gupta, M.D., Las Vegas, NV                  | Caterina A. Iapaolo, M.D., West Palm Beach, FL         |
| Lalit Gupta, M.D., Decorah, IA                     | Olga Ignatowicz, M.D., Roseville, CA                   |
| Elmer Gurmai, M.D., Elk Grove, CA                  | Glenn Kikuya Ikawa, M.D., Fresno, CA                   |
| Jeffrey Todd Gursky, M.D., Rochester, MN           | Segundo A. Imbert, M.D., Orlando, FL                   |
| Michael Haberecht, M.D., Menlo Park, CA            | Shahid Saifuddin Insaf, M.D., Branson, MO              |
| Arif Habib, M.D., Granite City, IL                 | Bogdan Ionescu, M.D., Newport News, VA                 |
| Asif Habib, M.D., Granite City, IL                 | Julia J. Garcia Irwin, M.D., Norman, OK                |
| Arlene Debora Hagen, M.D., Portland, OR            | Ihab Monir Istafanous, M.D., San Antonio, TX           |
| Moataz Yousef Haggag, M.D., Dix Hills, NY          | Pius Jacob, M.D., Dade City, FL                        |
| H. Steven Hahn, M.D., Saint Cloud, MN              | Vernetta H. Jacobs, M.D., Elgin, SC                    |
| Jennie Happy Hahn, M.D., Cincinnati, OH            | Fredesvinda Jacobs-Alvarez, M.D., Orlando, FL          |
| Cheryl Green Hajek, M.D., Mill Creek, WA           | Jill Ann Jacobson, M.D., New York, NY                  |
| Tara Broyard Hammond, M.D., Lawrenceville, GA      | Danuta Jagla-Schudel, M.D., APO, AE                    |
| Mary Jo Hanigan, M.D., Omaha, NE                   | Valentina Jalynytchev, M.D., Waltham, MA               |
| Paul Francis Hanley, M.D., Dayton, OH              | Deborah Sheryl James, M.D., Sun Valley, Cape Town      |
| Ayman George Hanna, M.D., Wesley Chapel, FL        | Thulasiram Janardhanan, M.D., New York, NY             |
| Seema Yasmeen Haque, M.D., Plano, TX               | Irene Jernazian-Kanaian, M.D., Glendale, CA            |
| Susan Jennifer Harper, M.D., Topeka, KS            | Amita Deepak Jha, M.D., Rockville, MD                  |
| Theresa L. Harpold, M.D., Kingston, MA             | Elizabeth John, M.D., Lakewood Ranch, FL               |
| Calvin Jerome Harris, M.D., Decatur, AL            | Shirley John, M.D., Delmont, PA                        |
| Emily Stella Harris, M.D., Davis, CA               | Bankole A. Johnson, M.D., Ph.D., Ellicott City, MD     |
| J. Allen Harris, M.D., Hattiesburg, MS             | Christopher Robert Johnson, M.D., Houston, TX          |
| Bonnie Hartman, M.D., Seattle, WA                  | David Sidney Johnson, M.D., Ph.D., San Mateo, CA       |
| Mehrul Hasnain, M.D., Mount Pearl, NL              | Kimberly Ann Johnson, M.D., Pikeville, NC              |
| Rusti Thea Hauge, M.D., Houston, TX                | Shannon Renee Jones, M.D., Evansville, IN              |
| Andrew Witt Hedgepath, M.D., Columbia, SC          | Michael Emerson Judd, M.D., Lynchburg, VA              |
| Tanya Karina Heinrich, M.D., New Berlin, WI        | David George Kaiser, M.D., Conroe, TX                  |
| Thomas William Heinrich, M.D., New Berlin, WI      | Shehzad Kamran, M.D., Norwalk, IA                      |
| Naveena Hemanth, M.D., Brookeville, MD             | Kevin Dev Kapila, M.D., Jamaica Plain, MA              |
| Denise Wynnet Henderson, M.D., Carmichael, CA      | Wajiha Parveen Karatela, M.D., Ballwin, MO             |
| Charles Michael Hendricks, M.D., Clarksville, OH   | Tatyana Karchov, M.D., Portland, ME                    |
| Jason Edward Hershberger, M.D., Brooklyn, NY       | Jordan Friedman Karp, M.D., Pittsburgh, PA             |
| James Michael Hetznecker, M.D., Havertown, PA      | Robert A. Karp, M.D., Summit, NJ                       |
| Edith E. Hidalgo, M.D., Tallahassee, FL            | Arda Kasaci, M.D., Fairfax, VA                         |
| Michael John Higgins, M.D., San Antonio, TX        | Anthony Marwan Kassir, M.D., Aliso Viejo, CA           |
| Napoleon B. Higgins Jr., M.D., Friendswood, TX     | Karyn Katsenes, M.D., Denver, CO                       |
| Jeffrey Von Hill, M.D., Ft Lewis, WA               | Olga Katz, M.D., Staten Island, NY                     |
| Mary Wynn Hill, M.D., Beaufort, SC                 | Christopher Ira Kauffman, M.D., Bay Harbor Islands, FL |
| Devon Emerson Hinton, M.D., Ph.D., Brookline, MA   | Brian Michael Keefe, M.D., Port Washington, NY         |
| Ron Hirsh, M.D., Fair Lawn, NJ                     | Keith Eldon Kesler, D.O., Austin, TX                   |
| Elizabeth Hogan, M.D., Aiken, SC                   | Nizamuddin Khaja, M.D., Cedartown, GA                  |
| Daphne Jane Holt, M.D., Ph.D., Cambridge, MA       | Arif Masood Khan, M.D., Arlington, TX                  |
| Cordula T. Holzer, M.D., Philadelphia, PA          | Faiza Khan, M.D., Glen Head, NY                        |
| L. Elliot Hong, M.D., Ellicott City, MD            | Shakil Khan, M.D., Hoover, AL                          |
| Leslie Ann Horton, M.D., Ph.D., Los Angeles, CA    | Sikandar Khan, M.D., Fort Walton Beach, FL             |
| Ewald Horwath, M.D., Cleveland, OH                 | Rashida Khanam, M.D., Williamsville, NY                |
| Elizabeth Schroth Howard, M.D., Goshen, KY         | Rohit Mohan Khanna, M.D., Marietta, GA                 |
| Qi Hu, M.D., Hicksville, NY                        | Ravdeep S. Khanuja, M.D., Kirkwood, MO                 |
| Yuange Hu, M.D., Monroe Township, NJ               | Leena Vivek Khanzode, M.D., Cupertino, CA              |
| Debora E. Huberman-Barchilon, M.D., Great Neck, NY | Shella Asif Khatri, M.D., Port Matilda, PA             |
| Elizabeth Ruth Hudler, M.D., San Diego, CA         | Imran Shuja Khawaja, M.D., Eagan, MN                   |
| Diana Maria Hughes, M.D., New Rochelle, NY         | Henry Htwe Lay Khin, M.D., Arcadia, CA                 |
| Najeeb Ullah Hussain, M.D., Bordentown, NJ         | Ni Aye Khin, M.D., Rockville, MD                       |
| Shahid Hussain, M.D., Milford, MI                  | Khursheed Khanum Khine, M.D., Falls Church, VA         |
| Charlotte N. P. Hutton, M.D., Kenner, LA           | Imad Moh'd Khreim, M.D., Shrewsbury, MA                |

(MOC Psychiatry continued)

|                                                              |                                                     |
|--------------------------------------------------------------|-----------------------------------------------------|
| Jocelyn Ang Kilgore, M.D., Alexandria, VA                    | Xiangyang Li, M.D. PhD, Wellesley, MA               |
| Deborah Rubin Kim, M.D., Bala Cynwyd, PA                     | Margaret Ting Lin, M.D., Rowland Heights, CA        |
| Haesue Florence Seung Kim, M.D., Charlotte, NC               | Leigh Ann Lindsey, M.D., Claremont, CA              |
| James Norman Kimball, M.D., Advance, NC                      | Gerard Paul Lippert, M.D., Ithaca, NY               |
| Lunsford Richardson King, M.D., Pembroke, NC                 | Enrique Mendiola Lirag, M.D., Nazareth, PA          |
| Patricia Orozco Kirby, M.D., Glendale, AZ                    | Qinyue Liu, M.D., Warren, NJ                        |
| Mary Veronica Kirkwood, M.D., Fond Du Lac, WI                | Jonathan Clay Lockhart, M.D., Longview, TX          |
| Andrew Michael Kleiman, M.D., Winter Park, FL                | Veronika Logovinsky, M.D., Ph.D., Fort Lee, NJ      |
| Diane Alix Klein, M.D., New York, NY                         | Maria C. Longuemare, M.D., Ph.D., San Francisco, CA |
| Bradley Jay Kleinsasser, M.D., Sioux Falls, SD               | Marideli Lopez, M.D., Manlius, NY                   |
| Kimberly Gottlieb Klipstein, M.D., New York, NY              | Julie Ann Lord, M.D., Seattle, WA                   |
| Erik David Knudson, M.D., Madison, WI                        | Pearl Maria Louie, M.D., Westfield, NJ              |
| Paul Mark Kocsis, M.D., Cary, NC                             | Rajendra Lowtan, M.D., Ellicott City, MD            |
| Padmaja Kodali, M.D., Tomah, WI                              | Hua Luo, M.D., Camel, IN                            |
| Himabindu Koneru, M.D., Plymouth Meeting, PA                 | Anne Bodmer Lutz, M.D., Shrewsbury, MA              |
| Maya Leba Kopell, M.D., Palo Alto, CA                        | Ann Louise Lyles, M.D., Sequim, WA                  |
| Simon Theodorus Koppes, M.D., White Plains, NY               | C. David Lynam, M.D., Portland, OR                  |
| Elizabeth Jane Kostrey, M.D., Glendale, CA                   | Scot Robert MacLean, M.D., Portland, OR             |
| Viktor Kotlyar, M.D., Newington, CT                          | William Scott MacMorran, M.D., Berkeley, CA         |
| Lois Elaine Krahn, M.D., Scottsdale, AZ                      | Julie Berry Maggiolo, M.D., Evanston, WY            |
| Nora M. Kramer, M.D., Bala Cynwyd, PA                        | Deepak Shridhar Mahajan, M.D., Aston, PA            |
| John Edward Kraus Jr., M.D., Ph.D., Apex, NC                 | Ron David Mahlab, M.D., Philadelphia, PA            |
| Amy Cortright Krohn, M.D., Madison, WI                       | Khalid Mahmood, M.D., Mountain Top, PA              |
| George Charles Kruse, M.D., Clifton, NJ                      | Kanchan Malavade Mahon, M.D., Endwell, NY           |
| Veena Kulkarni, M.D., Lake Grove, NY                         | Shishuka Malhotra, M.D., Massillon, OH              |
| Sara Ingri Kulleseid, M.D., Bryn Mawr, PA                    | Perry Anthony Z. Maliuanag, M.D., Santa Clara, CA   |
| Kimberly Dawn Kumer, M.D., Canton, OH                        | Weldon John Mallgren, D.O., Claremore, OK           |
| Laura Jean Kunkel, M.D., Stony Brook, NY                     | Bradford H. Mallory, M.D., Colorado Springs, CO     |
| Gina Rosalind Kuperberg, M.D., Ph.D., Cambridge, MA          | Darren Louis Mancuso, D.O., Pittsford, NY           |
| Mary Kurien, M.D., Jenkintown, PA                            | Konoy Kishore Mandal, M.D., Louisville, CO          |
| Sujana Reddy Kurri, M.D., Phoenixville, PA                   | Michael James Marceau, M.D., Williamsport, PA       |
| Gianluca La Monaca, M.D., Shepherdstown, WV                  | Mirela Delia Marcu, M.D., Creve Coeur, MO           |
| Pilar Lachhwani, M.D., Beachwood, OH                         | Michael James Mardis, M.D., Tucson, AZ              |
| William Curt Phillip LaFrance Jr., M.D., M.P.H., Bristol, RI | Stephanie Elizabeth Markman, M.D., Phoenix, AZ      |
| Catherine Ann Lager, M.D., Cambridge, MA                     | Megan Takeko Marumoto, M.D., Alexandria, VA         |
| Laura T. Lai, M.D., Pasadena, CA                             | Susan Lynn Marusak, M.D., Santa Monica, CA          |
| Julie Anne Lamb, M.D., Homewood, AL                          | Gurjot Kaur Marwah, M.D., Tempe, AZ                 |
| Leandrea Sue Lambertson, M.D., Port Washington, WI           | Michael Farell Massa, M.D., Apo, AE                 |
| James Christian Lamousin, M.D., Hattiesburg, MS              | Sajida Mathew, M.D., Lake Orion, MI                 |
| Nancy Graham Lance, M.D., Cotuit, MA                         | Paula Marie Mathewson, M.D., Brownsburg, IN         |
| Mary G. Langdon, M.D., Anchorage, AK                         | Barbara Gavin Mattox, M.D., Raleigh, NC             |
| Jaakko Arto Lappalainen, M.D., Wilmington, DE                | Mathew Sean McCarthy, M.D., Kenosha, WI             |
| Michael Edward Lara, M.D., Belmont, CA                       | Eben Lee McClenahan, M.D., M.S., Kenner, LA         |
| Kimberly Wells Larsen, M.D., Elk Grove, CA                   | Benjamin H. McCommon, M.D., New York, NY            |
| Nathan Ernest Lavid, M.D., Long Beach, CA                    | Rachel Anne McCracken, M.B.B.Ch., Sioux Falls, SD   |
| Eugene Young Lee, M.D., Daly City, CA                        | Adrienne Yvette McCray, D.O., West Chester, OH      |
| Sonya Lee Kelly, M.D., Hopkinton, NH                         | Robert Erne McCullumsmith, M.D., Ph.D., Wyoming, OH |
| Suzi Leidig, M.D., Hershey, PA                               | Seth McGowan, M.D., Tenafly, NJ                     |
| Manoj Suresh Lekhwani, M.D., Cheswick, PA                    | Debbi M. McInteer, M.D., East Greenwich, RI         |
| Anna Lembke, M.D., Stanford, CA                              | James Michael McKinnon, M.D., Prescott, AZ          |
| Craig Allen Lemmen, M.D., Ann Arbor, MI                      | Kirk Patrick McNagny, M.D., Long Beach, CA          |
| William D. Leusink, M.D., Colorado Springs, CO               | Danny James Meadows, M.D., Logansport, IN           |
| Dale Howard Levandowski, M.D., El Paso, TX                   | Laurie Meckler, M.D., New York, NY                  |
| Regina Yvonne Leverrier, M.D., Grand Junction, CO            | Juan Manuel Medina, M.D., Chatham, IL               |
| Heather Maureen Lewerenz, M.D., New York, NY                 | Sharon Beth Meglathery, M.D., Tucson, AZ            |
| Ellen Jennifer Li, M.D., Seattle, WA                         | Diana Frances Melazzo, D.O., Destin, FL             |

(MOC Psychiatry continued)

|                                                            |                                                       |
|------------------------------------------------------------|-------------------------------------------------------|
| Eviline Meleka, M.D., South Easton, MA                     | Jon Scott Novick, M.D., Toronto, ON                   |
| Sherri Ann Mello, M.D., Waltham, MA                        | Richard Julian Nunes, M.D., Livermore, CA             |
| Mohammed Amin Memon, M.D., Inman, SC                       | Ngozi Grace Nwanna, M.D., Sykesville, MD              |
| Scott Douglas Mendelson, M.D., Ph.D., Roseburg, OR         | Enrique Luis Maria Ochoa, M.D., Ph.D., Davis, CA      |
| Delquis Rafael Mendoza, M.D., Alpharetta, GA               | Natalya Ogievetsky, M.D., Woodmere, NY                |
| Michael Anthony Mennella, M.D., Smithtown, NY              | Olivia Ifeoma Okereke, M.D., M.S., Belmont, MA        |
| Andrea Jean Mernan, M.D., Warwick, RI                      | Carolina Oldham, M.D., Miami, FL                      |
| Jeffrey Anthony Metzner, M.D., Kansas City, MO             | Jeanette Helen Oleskovicz, M.D., North Liberty, IA    |
| Matthew Elliot Meyer, M.D., Tulsa, OK                      | Bahram Omidian, M.D., Utica, NY                       |
| Clara T. Michael, M.D., Salt Lake City, UT                 | Jeremy Eugene Orgel, M.D., San Francisco, CA          |
| Mark Alan Midthun, M.D., Onalaska, WI                      | Alex B. Orlikov, M.D., Ph.D., Newton, MA              |
| Jasdeep Bobby Singh Miglani, M.D., Manassas, VA            | Cleopatra Ortiz, M.D., West Palm Beach, FL            |
| Vivian Gina Giovanna Mihailescu, M.D., New York, NY        | Jan Chandler Osborne, M.D., Sheffield, AL             |
| Anita Mikita, M.D., Milledgeville, GA                      | Robyn Alyse Osrow, M.D., Mount Sinai, NY              |
| Mate Istvan Milak, M.D., Yonkers, NY                       | Luis Felix Oxholm, D.O., Traverse City, MI            |
| Brian Patrick Miller, M.D., San Diego, CA                  | Catherine Oyenike Oyejide, M.D., Summit, NJ           |
| Karin Drake Miller, M.D., Orangeburg, NY                   | Kangeyan Pachaiyappan, M.D., Fort Irwin, CA           |
| Lori Colleen Miller, D.O., Tulsa, OK                       | Christine Packard, D.O., Williamsport, PA             |
| Sherley Millet, M.D., Jamaica, NY                          | Mangalore Narayana Pai, M.D., Edmond, OK              |
| Darian Vincent Minkunas, M.D., Portland, OR                | Tamon Berber Paige, M.D., Webb City, MO               |
| Ruben Alberto Miozzo, M.D., Shrewsbury, MA                 | Mary Paizis, M.D., New York, NY                       |
| Nadeem Mohammad Mirza, M.B.B.S., Portage, MI               | Claude Lynn Parker, M.D., Waco, TX                    |
| John Charles Mitchell, D.O., Fort Gratiot, MI              | Marthel Elena Parsons, M.D., Independence, MO         |
| Darlene Mary Mitera, M.D., New York, NY                    | Bolivar Pascual, M.D., Bogota, NJ                     |
| Akikur Reza Mohammad, M.D., West Hills, CA                 | Marilou Patalinjug Tyner, M.D., Bridgeport, WV        |
| Mohammad Mohmand, M.D., MPH, Owings Mills, MD              | Thomas A.J. Patamia, M.D., Normandy Park, WA          |
| Cherry Ann Monroy-Miller, M.D., Morris Plains, NJ          | Trupti V. Patel, M.D., Columbus, OH                   |
| Stephen Terrence Moore, D.O., Cookeville, TN               | Mahendra Laxmanrao Patil, M.D., Pittsburgh, PA        |
| Lanna Mercedes Moore-Duncan, M.D., Kent, WA                | James Thomas Pawlowski, M.D., Wilmington, NC          |
| Caroline Morin, M.D., FRCPC, Calgary, AB                   | Roger Peele, M.D., Rockville, MD                      |
| Paul Matthew Morrissey, M.D., Watertown, NY                | Lisa Cristine Pellegrini, M.D., Elmhurst, IL          |
| Ronald Vincent Moruzzi, D.O., Alexandria, VA               | Jenny Lynn Peloquen, D.O., Austin, TX                 |
| Ladan Mostaghimi-Tehrani, M.D., Madison, WI                | Francis Robert Peluso, D.O., Daphne, AL               |
| Manuel Ramon Mota-Castillo, M.D., Heathrow, FL             | Selene Pena, M.D., Guaynabo, PR                       |
| Hemalatha Mukhara, M.D., Ashburn, VA                       | Dahlia Saad Pendergrass, M.D., Hartford, CT           |
| Chole G. Mullen, M.D., Cincinnati, OH                      | Lina Marie Perez, M.D., Horsham, PA                   |
| Linda Susan Mullen, M.D., Flagstaff, AZ                    | Melissa Perez-Maceda, M.D., Greenwood, SC             |
| Richard Garver Munson, M.D., Williston, VT                 | Paul Franklin Perkins, M.D., Bath, ME                 |
| Kevin LaBran Murphy, M.D., Fort Wayne, IN                  | Roy Howard Perlis, M.D., Boston, MA                   |
| Suzanne Buek Murray, M.D., Kenmore, WA                     | Raja Kumari Perni, M.D., West Bloomfield, MI          |
| Shaheen Fatema Mustafa, M.D., North Chesterfield, VA       | Elizabeth Henderson Perry, M.D., Madison, MS          |
| Syed Kamal Mustafa, M.D., Bothell, WA                      | Eric D. Peselow, M.D., Brooklyn, NY                   |
| David Kent Nace, M.D., Bryn Mawr, PA                       | Anton Pesok, M.D., Boston, MA                         |
| Steven Alexander Naprawa, M.D., Baldwinsville, NY          | Julie Elizabeth Peters, M.D., New Haven, CT           |
| Gonchigari Narayana, M.D., Moline, IL                      | Pamela Jean Petersen-Crair, M.D., Guilford, CT        |
| Rajesh Narendran, MD, Pittsburgh, PA                       | Donna Kay Philippi, D.O., Salt Lake City, UT          |
| Ahsan A. Naseem, M.D., Lincoln, NE                         | Kerry Lee Pierce, M.D., Midland, MI                   |
| Jay Anthony Nathanson, M.D., Toronto, ON                   | James Clark Pilkinton, M.D., Boligee, AL              |
| Alejandro V. Natividad, M.D., Amarillo, TX                 | Patricia Diane Pilkinton, M.D., Boligee, AL           |
| Judith T. Navarro, M.D., Wynnewood, PA                     | Vesna Pirec, M.D., Ph.D., Chicago, IL                 |
| Sasi Kiran Nayudu, M.D., Albany, GA                        | Lori Alma Pittinger, M.D., Fairlawn, OH               |
| Claudia Jane Nelson, M.D., M.P.H., Brooklyn, NY            | John Gregory Pogue, M.D., Tyler, TX                   |
| Phillip W. Neuberger, M.D., Anchorage, AK                  | Laurie Jo Polubinsky, M.D., Cumberland, WI            |
| Juliet Aurelia Nichols-Nicolescu, M.D., Port Jefferson, NY | Joanna Ewa Poluha-O'Neil, M.D., Ph.D., Shrewsbury, MA |
| Patrick Michael Nolan, M.D., Benicia, CA                   | Joanna Poniatowicz, M.D., Des Plaines, IL             |
| Robin Marie Norman, M.D., Jamestown, OH                    | Ronald Dale Poole, M.D., Scott Afb, IL                |

(MOC Psychiatry continued)

|                                                         |                                                   |
|---------------------------------------------------------|---------------------------------------------------|
| Alexandra Newlin Powell, M.D., Durham, NC               | Theresa M. Voissem Ruano, D.O., Riverview, FL     |
| James Harrison Powers, M.D., Portland, OR               | Steven Rudin, M.D., New York, NY                  |
| Kara Powers, M.D., Portland, OR                         | Tabassum Saba, M.D., Joplin, MO                   |
| Kalpana Raj Prasad, M.D., Bryn Mawr, PA                 | Noha H. Sadek, M.D., Riverside, RI                |
| Manish Prasad, M.D., Ann Arbor, MI                      | Waheed Ahmad Saeed, M.D., Patton, CA              |
| Sridhar Prathikanti, M.D., Hillsborough, CA             | Pamela Sue Sunday Saha, M.D., Brooklyn, NY        |
| Yohanan Preschel, M.D., New York, NY                    | Muhammad Wasim Sajid, M.D., Louisville, KY        |
| Olgierd Antoni Pucilowski, M.D., Ph.D., Chapel Hill, NC | Joseph Thomas Sakai, M.D., Denver, CO             |
| Teresa Purdy, M.D., Durham, NC                          | Samir A. Salama, M.D., Broussard, LA              |
| Parimal Bhagvatprasad Purohit, M.D., Lenexa, KS         | Maher M. Saleeb, M.D., Alta Loma, CA              |
| Fariha Qadir, M.D., Bloomfield Hills, MI                | Fabian M. Saleh, M.D., Boston, MA                 |
| Michael David Rabinoff, D.O., Ph.D., San Jose, CA       | Mark S. Samson, M.D., Olympia, WA                 |
| Jyothi Racha, M.D., North Potomac, MD                   | Racquel San Juan, D.O., Green Brook, NJ           |
| Rumiana Radic, M.D., Toms River, NJ                     | Raimundo Andres C. San Martin, M.D., Ossining, NY |
| Jagdish R. Ragade, M.D., Portland, OR                   | Manuel Ignacio Sanchez, M.D., Elizabeth, NJ       |
| Roxana Gabriela Raicu, M.D., Santa Fe, NM               | Mario Juan Sanchez-Martinez, M.D., Miami, FL      |
| Manzar Yousuf Rajput, M.D., Jackson, MI                 | Elda Patricia Sancho Mora, M.D., Maplewood, NJ    |
| Zulfiqar-Ali Rajput, M.D., Howell, NJ                   | Gurdial S. Sandhu, M.D., Pearl, MS                |
| Elangovan Ramadas, M.D., Katy, TX                       | Victoria Lynn Sanelli, M.D., Highland Hgts, OH    |
| Jamie Michelle Rambeau, M.D., Lewiston, ID              | L. Paul - Antoine Sanon, M.D., Holliswood, NY     |
| Narayanan Ramesh, M.D., Gaithersburg, MD                | John Richard Sarcar, M.D., Casco, MI              |
| Rachelle Halagao Ramos, M.D., New York, NY              | Adnan Sarcevic, M.D., Dix Hills, NY               |
| Melissa Green Ramsden, M.D., Oakhurst, QLD              | Nabila Lamey Sargious, M.D., Canfield, OH         |
| Anusha Ranganathan, M.D., Ann Arbor, MI                 | Syed Pirzada Sattar, M.D., Omaha, NE              |
| Sabita J. Rathi, M.D., Cheshire, CT                     | John Andrew Saunders, M.D., San Diego, CA         |
| Narayana A. Reddy, M.D., Peoria, IL                     | Bella Schanzer, M.D., Southfield, MI              |
| Pavan Kumar P. Reddy, M.D., Salem, VA                   | Nancy Marie Schiess, D.O., Albuquerque, NM        |
| Svathi Mannapuram Reddy, M.D., Marietta, GA             | Esther Miriam Schlesinger, M.D., Edison, NJ       |
| Viswanatha Juvvala Reddy, M.D., Claremont, CA           | Ben Joseph Schoenbachler, M.D., Louisville, KY    |
| Ghazala Amjad Rehan, M.D., Carlsbad, CA                 | Robert James Schuman, M.D., Tinton Falls, NJ      |
| Shahida Rehmani, M.D., Pittsford, NY                    | Jeffrey I. Schwartz, M.D., Tarzana, CA            |
| Robert Reich, M.D., Great Neck, NY                      | Roxane W. Scott, M.D., North Charleston, SC       |
| Bryn Joi Haase Reina, M.D., Coronado, CA                | Mary J. Searcy, M.D., Little Rock, AR             |
| Marco Antonio Renazco, M.D., Katy, TX                   | David Steven Sehr, M.D., Fort Collins, CO         |
| Andrew Gabriel Resnik, M.D., Hartsburg, MO              | Tamar Marietta Seiver, M.D., Mill Valley, CA      |
| Patrizia Riccardi, M.D., New York, NY                   | Maria Iza Seliverstov, M.D., Sherman Oaks, CA     |
| Silvana Riggio, M.D., New York, NY                      | Thomas Frederick Semper, M.D., Seattle, WA        |
| Brenda Leigh Ringel, M.D., Carlsbad, CA                 | Camilo Francisco Serrano, M.D., Franklinville, NJ |
| Syed Tahir Abbas Rizvi, M.D., Valencia, CA              | Meera Sethi, M.D., McLean, VA                     |
| Paul Irvin Robbins, M.D., Moncks Corner, SC             | Dipika Jayesh Shah, M.D., Cincinnati, OH          |
| Laura Weiss Roberts, M.D., Stanford, CA                 | Kavita Shah, M.D., Naperville, IL                 |
| Robert Obie Robinson, M.D., Beaumont, TX                | Scott Stephen Shapiro, M.D., Jersey City, NJ      |
| Jael Noemi Robles, M.D., La Grange Park, IL             | Vance Eugene Sherman, M.D., Port Townsend, WA     |
| Donna Therese Rocha, M.D., Houston, TX                  | Prakash Shivaram Shet, M.D., Mexia, TX            |
| Gregory V. Roeben, M.D., Bellevue, WA                   | Ioana M. Naumescu Shirley, M.D., Mountain Brk, AL |
| Harriet Walker Roeder, M.D., Stanford, CA               | Ramesh Kumar Shivani, M.D., Milford, OH           |
| Craig Steven Rogers, M.D., Katonah, NY                  | Basem Kaleem Shlewiet, M.D., Furlong, PA          |
| Charles Jeffrey Romero, M.D., Oil City, PA              | Stephen Louis Shopbell, M.D., Neenah, WI          |
| Daniel Alain Rosenthal, M.D., Northbrook, IL            | Devin Michael Shoquist, M.D., Gig Harbor, WA      |
| Susan Fink Rosenthal, M.D., Northbrook, IL              | Zhanna Shpitalnik, M.D., Scottsdale, AZ           |
| Jean Marie Ross, M.D., Troy, MI                         | Pamela Lynn Shuman, M.D., Danielson, CT           |
| Anna Michele Rossi, D.O., West Orange, NJ               | Rubina Sial, M.D., Bogart, GA                     |
| Mindy Rothbard, M.D., Sacramento, CA                    | Ather Saeed Ahmed Siddiqui, M.D., Oshkosh, WI     |
| Darren Martin Rothschild, M.D., Palm Harbor, FL         | Savira Virk Sidhu, M.D., Southaven, MS            |
| Patrick John Rowan, M.D., Westfield, NJ                 | Myrta Nancy Sifonte, M.D., San Juan, PR           |
| Cheryl Valerie Rozanov, M.D., High Point, NC            | Lorri Sills, M.D., Webster, MN                    |

(MOC Psychiatry continued)

|                                                      |                                                       |
|------------------------------------------------------|-------------------------------------------------------|
| Ira Marc Silverman, M.D., Riviera Beach, FL          | Yuan-Hua Nimish Thakore, M.D., Pepper Pike, OH        |
| Rose Marie Sime, M.D., Ossining, NY                  | Pradeep Thapar, M.D., Flossmoor, IL                   |
| Janine May Simmons, M.D., Ph.D., Silver Spring, MD   | Brian Hunt Thomas, M.D., Newnan, GA                   |
| Robert Craig Sincoff, M.D., Ph.D., Bakersfield, CA   | Diane Sims Thompson, M.D., Colorado Springs, CO       |
| Amar Singh, M.D., Red Deer, AB                       | Matthew Martin Thompson, M.D., Houston, TX            |
| Rajesh Singh, M.D., Sioux Falls, SD                  | Donna Lorraine Ticknor, M.D., Bowie, MD               |
| Rajkumar R. Singh, M.D., Freehold, NJ                | Julie Ann Tinklenberg, M.D., Stanford, CA             |
| Brenda Sinsheimer, M.D., New York, NY                | Anthony Michael Tobia, M.D., Monmouth Junction, NJ    |
| David Victor Skripka, M.D., Brooklyn, WI             | Gerardo Rivera Tolentino, M.D., Great River, NY       |
| Rumen Slavkov, M.D., Newcastle, WA                   | Olga Maria Tolscik, M.D., M.P.H., Amarillo, TX        |
| Lisa M. Sloat, M.D., Ellicott City, MD               | June Topacio, M.D., Philadelphia, PA                  |
| Brian Daniel Smith, M.D., East Lansing, MI           | Brian Christo Toshcoff, D.O., Homewood, AL            |
| Jennifer Boswell Snowden, M.D., Atlanta, GA          | Mehmet Cevdet Tosyali, M.D., Mamaroneck, NY           |
| Ivy Ellen Sohn, M.D., Sudbury, MA                    | Alexander Trakhtman, M.D., Brooklyn, NY               |
| Veronika Maria Solt, M.D., Millburn, NJ              | Hung Dinh Tran, M.D., Salem, OR                       |
| Matthew Dale Sommons, M.D., Summerside, PE           | Ida Muriel Trilnick, M.D., Wyndmoor, PA               |
| Peter Ching-Pei Soo, M.D., Spicewood, TX             | Imran Trimzi, M.D., Wilmington, DE                    |
| Deepika Sood, M.D., West Hempstead, NY               | Lizica Cristina Troneci, M.D., Floral Park, NY        |
| Navdeep Sood, M.D., Grand Island, NE                 | Alicia Louise Tschirhart, M.D., Apo, AE               |
| Heidi Lynn Sorenson, M.D., Baxter, MN                | Alice Chiu Li Tso, M.D., San Francisco, CA            |
| Renee Marie Sorrentino, M.D., Quincy, MA             | Nicholas Tsopelas, M.D., New York, NY                 |
| Lourdes Soto-Moreno, M.D., Yarmouth, NS              | Mason Spain Turner, M.D., San Francisco, CA           |
| Lori Briana Epps Spells, M.D., Cary, NC              | Howard Norman Tushman, M.D., Wilmette, IL             |
| Kevin Holmes Spicer, M.D., Charleston, SC            | Adele A. Tutter, M.D., Ph.D., Dobbs Ferry, NY         |
| John Clive Spiegel, M.D., Manhasset, NY              | Jonathan Charles Uecker, M.D., Anoka, MN              |
| David Lee Spiggle, M.D., San Francisco, CA           | Maria Amparo Umbert, M.D., Weston, FL                 |
| Beatrice Ann Spinelli, M.D., Brooklyn, NY            | Jody Ann Underwood, M.D., Riverside, RI               |
| Alla Iosifovna Spivak, M.D., San Francisco, CA       | Michael Thomas Unger, M.D., Acworth, GA               |
| Susan Londergan Springer, M.D., Westwood, MA         | Lois Alana Urick, M.D., Midlothian, VA                |
| Amy Lee Sproch, M.D., Haddonfield, NJ                | Sherri Lynn Klis Urso, M.D., Plainfield, IL           |
| Diana Stancov, M.D., Yorktown Heights, NY            | Razvan Theodor Vaida, M.D., Red Lion, PA              |
| Kira Danielle Burt Stein, M.D., Los Angeles, CA      | Maria J. Vega, M.D., Coral Gables, FL                 |
| Hans Stelmach, M.D., Wilmington, NC                  | Rodney Anthony Villanueva, M.D., Midland, NC          |
| Maureen Erin Stephenson, D.O., Missoula, MT          | Rachel Burdick Vinkey, M.D., Oakland, CA              |
| Angeline Stergiou, M.D., Lancaster, OH               | Susan Marie Voglmaier, M.D., Ph.D., San Francisco, CA |
| Bradley Strong, M.D., Seattle, WA                    | Stacy LaBar Volkert, M.D., Spring Valley, CA          |
| Feiteng Su, M.D., Champaign, IL                      | Serena Yuan Volpp, M.D., New York, NY                 |
| M. Elizabeth Sublette, M.D., Ph.D., New York, NY     | Svetlana Volskaya, M.D., Summit, NJ                   |
| Brent Anthony Sunderland, M.D., Indian Trail, NC     | Byron Richard Wadley, M.D., Longview, TX              |
| Stephen P. Sullivan, M.D., Tarrytown, NY             | Peggy Cherie Wadman, M.D., M.P.H., Newberry, SC       |
| Alejandra Ruth Suzuki, M.D., Irvine, CA              | Wendi Michelle Waits, M.D., Alexandria, VA            |
| Dragan Svrakic, M.D., Ph.D., Saint Louis, MO         | Richard Abraham Waldman, M.D., Atlanta, GA            |
| Jay Synn, M.D., Conover, NC                          | Dale James Wallington, M.D., West Hartford, CT        |
| Hema Nalini Talasila, M.D., Bay City, MI             | Calvert Glendon Warren, M.D., Buffalo, NY             |
| Rajesh Rajagopalan Tampi, MBBS, Cheshire, CT         | Carl F. Washburn Jr., M.D., Chaplin, CT               |
| Alan Minoru Taniguchi, M.D., Honolulu, HI            | Marta Karolina Wasiak, M.D., Alachua, FL              |
| Cheryl Rae Tapp, M.D., Fond Du Lac, WI               | Samy Yousef Wassef, M.D., Ann Arbor, MI               |
| Ahmed Abdelfattah Taranissi, M.D., Columbia, MO      | Thomas Henry Wassink, M.D., Iowa City, IA             |
| Monica Taylor-Desir, M.D., Glendale, AZ              | Tamara Beth Weisman, D.O., Livingston, NJ             |
| Stefan Petkov Tchepichev, M.D., Eagan, MN            | Susan Mary Welsby, M.D., Washington, DC               |
| Andrew Wayne Teaford, M.D., Wheat Ridge, CO          | Brian Charles Welsh, M.D., Aurora, OH                 |
| Cenk Tek, M.D., New Haven, CT                        | David K. Welsh, M.D., Ph.D., La Jolla, CA             |
| Russell Gregory Temme, M.D., Wauwatosa, WI           | Kim Wennhold, M.D., Oregon City, OR                   |
| Lily Ann Marie Tencza, M.D., Grosse Pointe Woods, MI | Janel Fletcher Whidbee, M.D., Boerne, TX              |
| Christina Louise Terrell, M.D., Louisville, KY       | William Preston Wilkes, M.D., Palo Alto, CA           |
| Trung Minh Thai, M.D., Huntington Beach, CA          | Amanda Elizabeth Williams, M.D., Atlanta,             |



(MOC Psychiatry continued)

Linda Lee Williams, M.D., Woodinville, WA  
John Keddy Wilson, M.D., Falls Church, VA  
Pamela R. Wine, M.D., Cambridge, MA  
William Clay Wolters, M.D., Germantown, TN  
Tsun-ung Wilson Woo, M.D., Ph.D., Belmont, MA  
Suzanne Hall Woodard, M.D., Baton Rouge, LA  
Michael Scott Woods, M.D., Plano, TX  
Tracy Rachel Woodward, M.D., Newburgh, IN  
Adam Frederick Wooten, D.O., Lexington, KY  
Edward Alva Workman, M.D., Knoxville, TN  
James Nicholas Worledge, M.D., Madison, WI  
Alejandra Wortman, M.D., Stamford, CT  
Ellen Chia Wu, M.D., Alpharetta, GA  
Minjing Wu, M.D., Seattle, WA

Jin Xu, M.D., Jericho, NY  
Jing Xu, M.D., Scarsdale, NY  
Igor M. Yampolsky, M.D., Tannersville, PA  
Chunlin Yang, M.D., Roseville, CA  
Suzanne Yang, M.D., Pittsburgh, PA  
Anatoliy M. Yanovskiy, M.D., Freehold, NJ  
Ki-Sook Yoo, M.D., Paramus, NJ  
Dykes Maxwell Young, M.D., San Francisco, CA  
Sonia Petkova Yovtcheva, M.D., Eagan, MN  
Mario Guillermo Zapata, M.D., Statesville, NC  
Dora Zaretsky, M.D., Forest Hills, NY  
Jian-Min Zhang, M.D., Ph.D., Woodstock, MD  
Joseph Dominic Zollo, M.D., Yarmouth Port, MA
